# Supplementary material for: A Comprehensive Evolutionary Study of Chloroplast RNA Editing in Gymnosperms: A Novel Type of G-to-A RNA Editing Is Common in Gymnosperms
Source: MDPI journal article supplement (doi:10.3390/ijms231810844), 2022-09-16
Supplement: s1 [file s1]

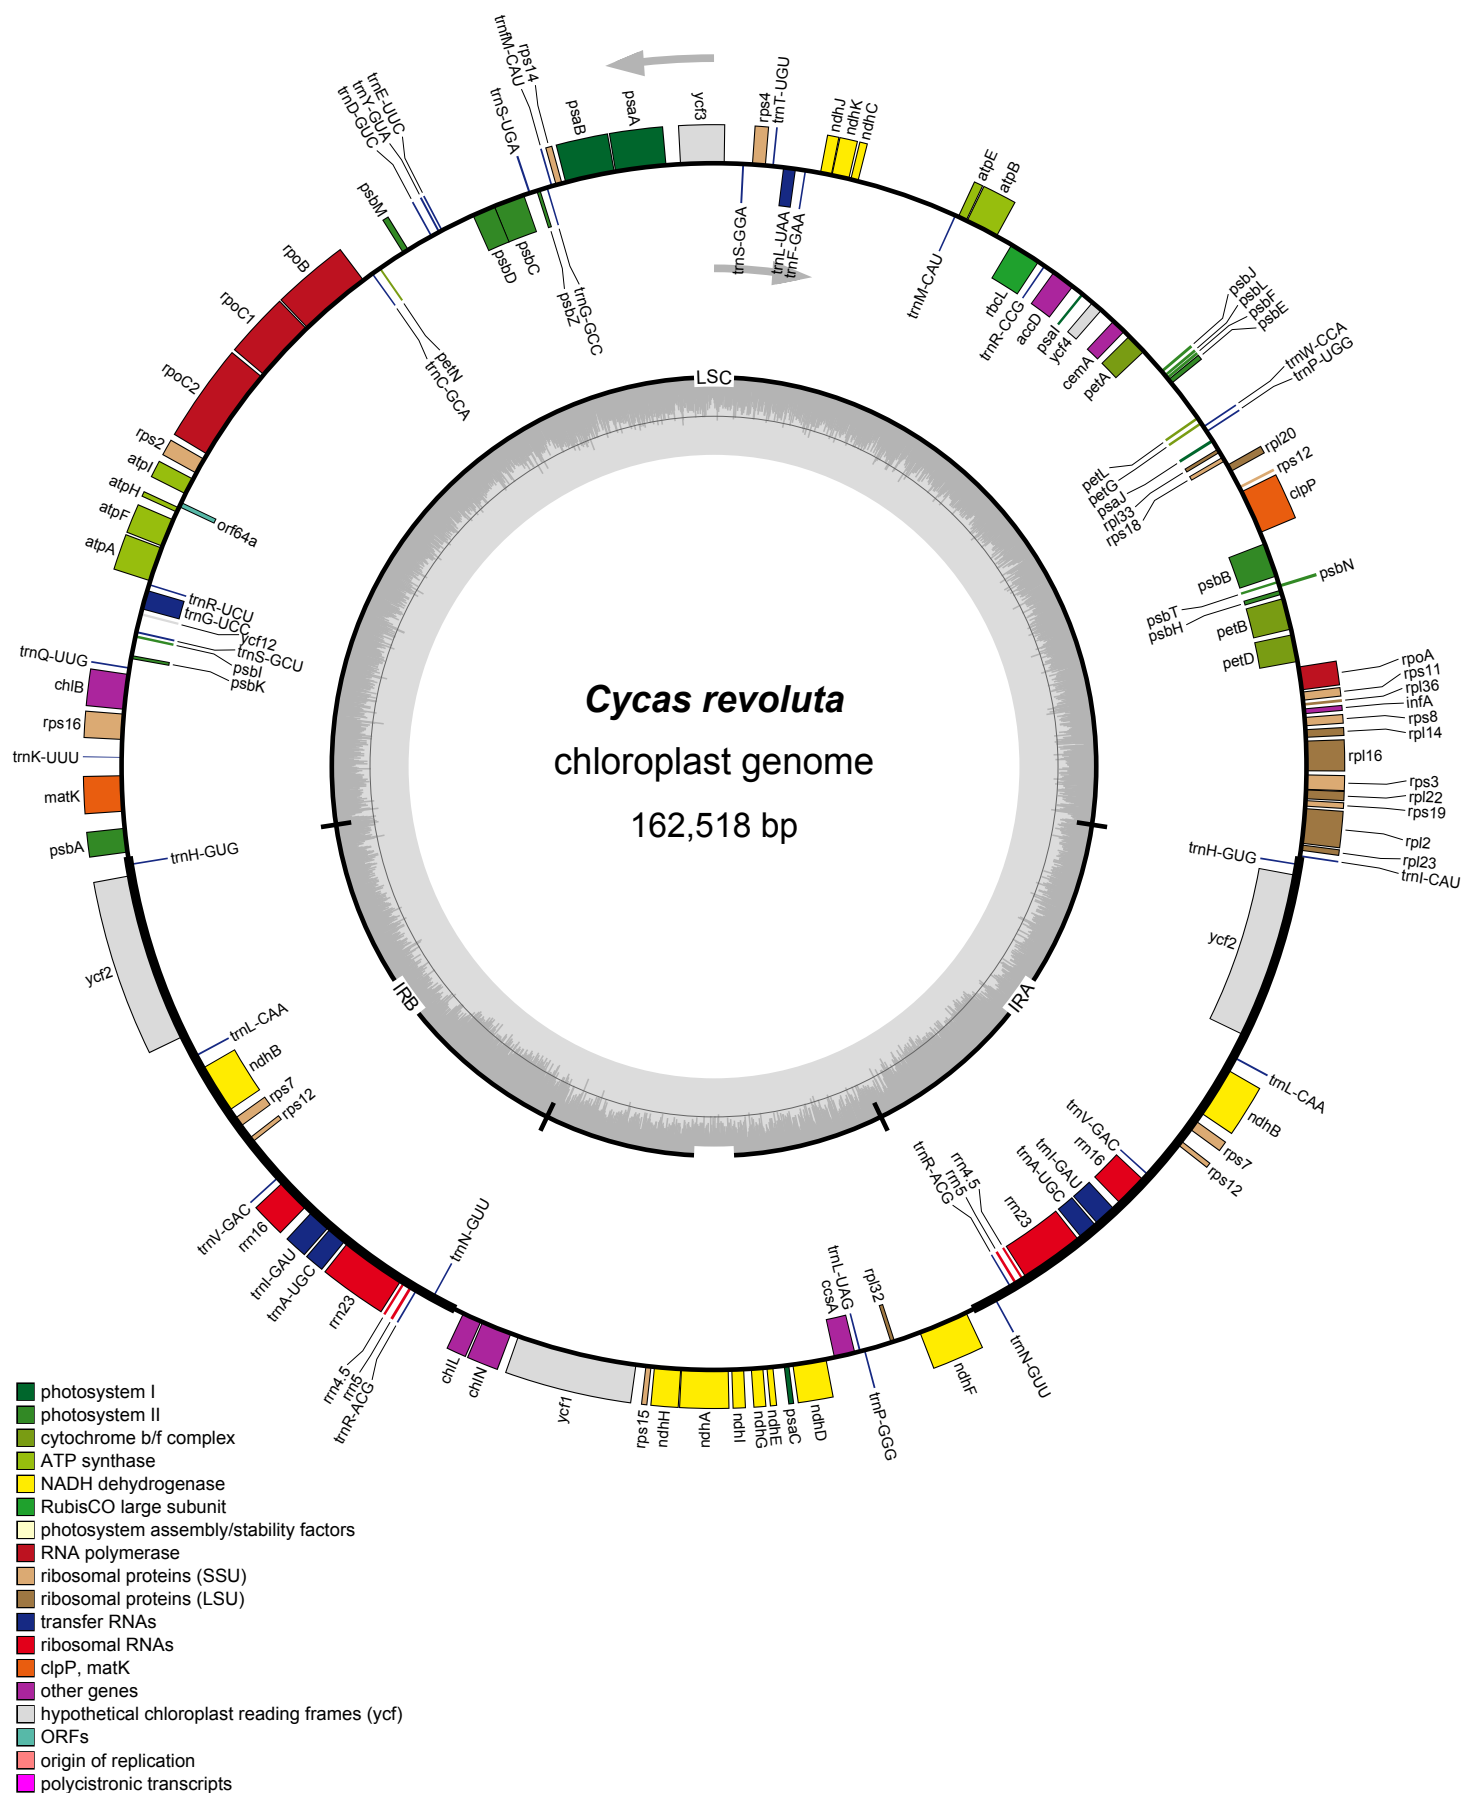

**Figure S5.** Map of the 19 gymnosperm plastomes drawn with the OGDRAW tool. Genes inside and outside the outer circle are transcribed clockwise and counter-clockwise, respectively. The darker grey in the inner circle represents the GC content and the lighter grey indicates the AT content. Genes belonging to different functional groups are color-coded.

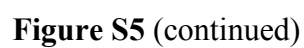





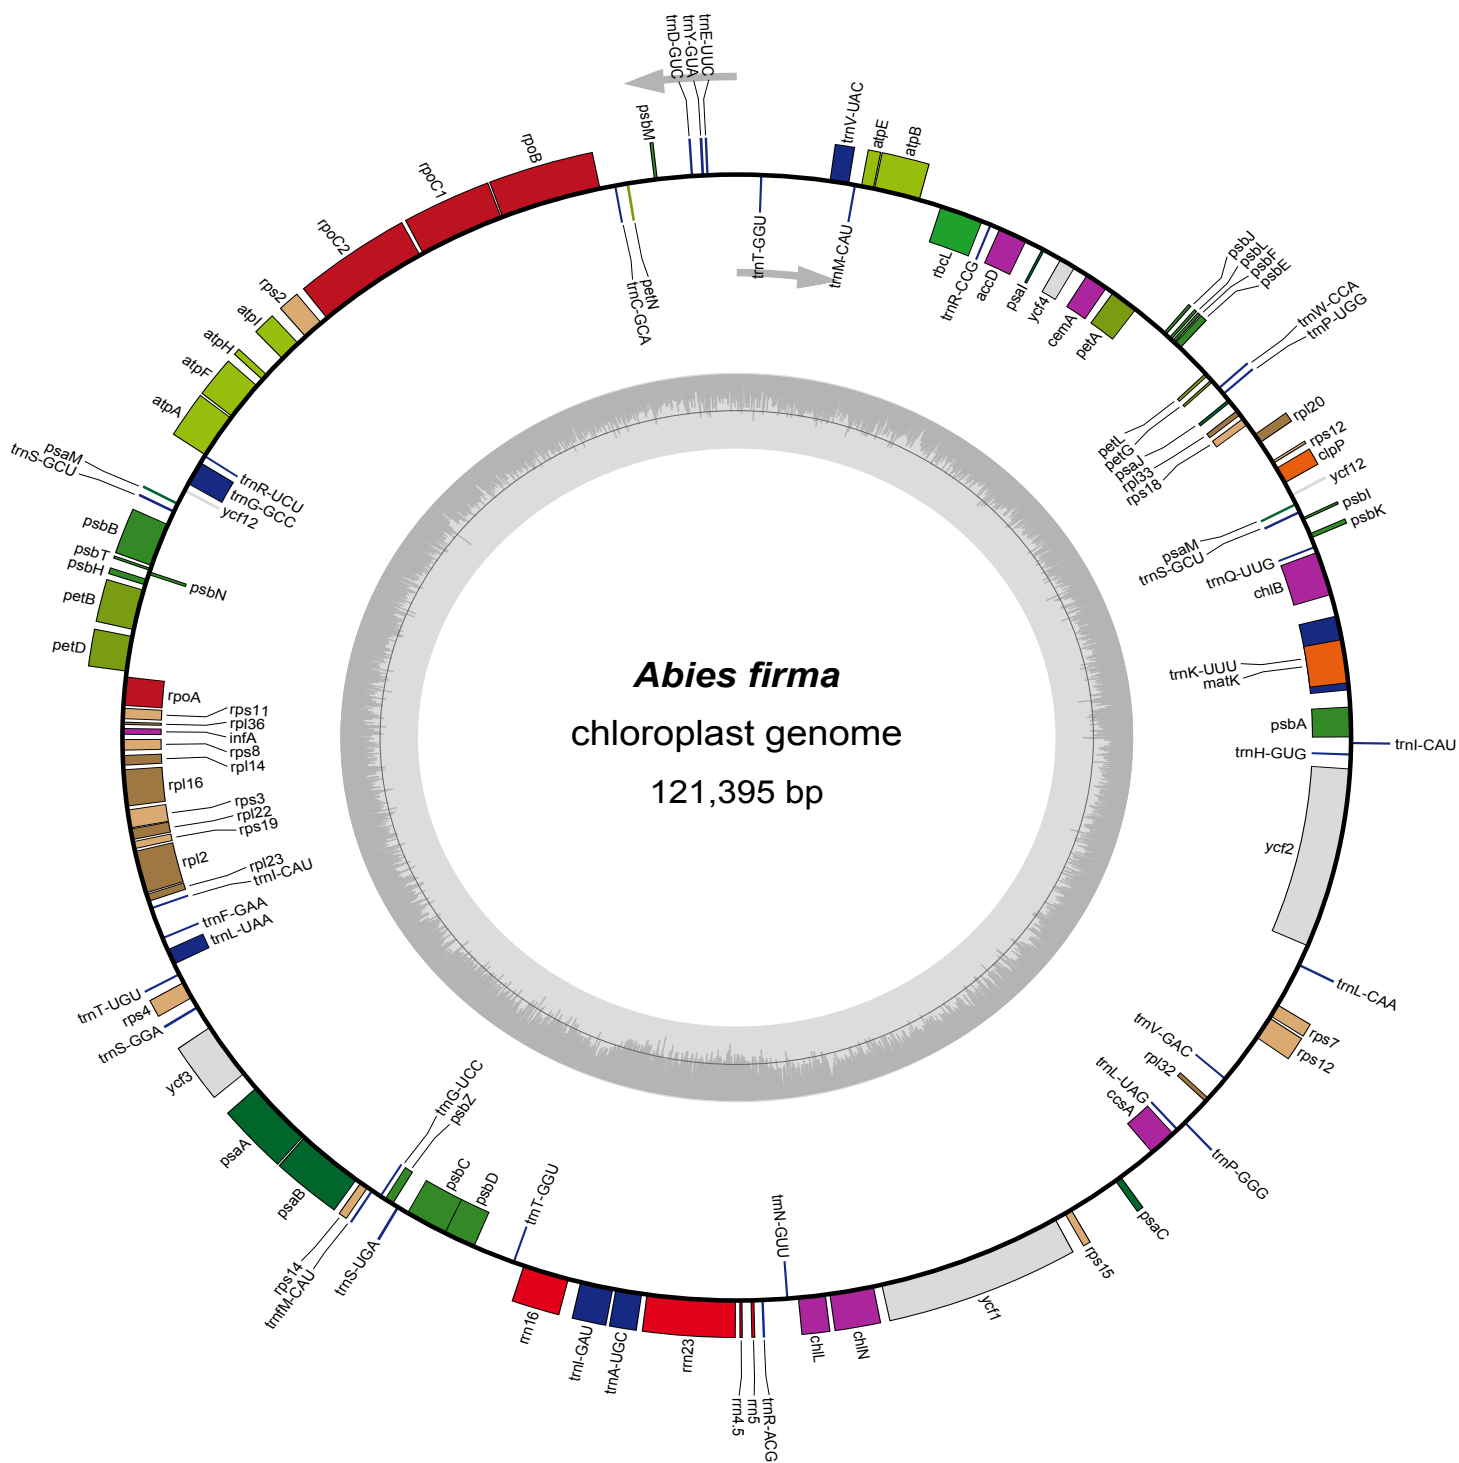

**Figure S5 (continued)**









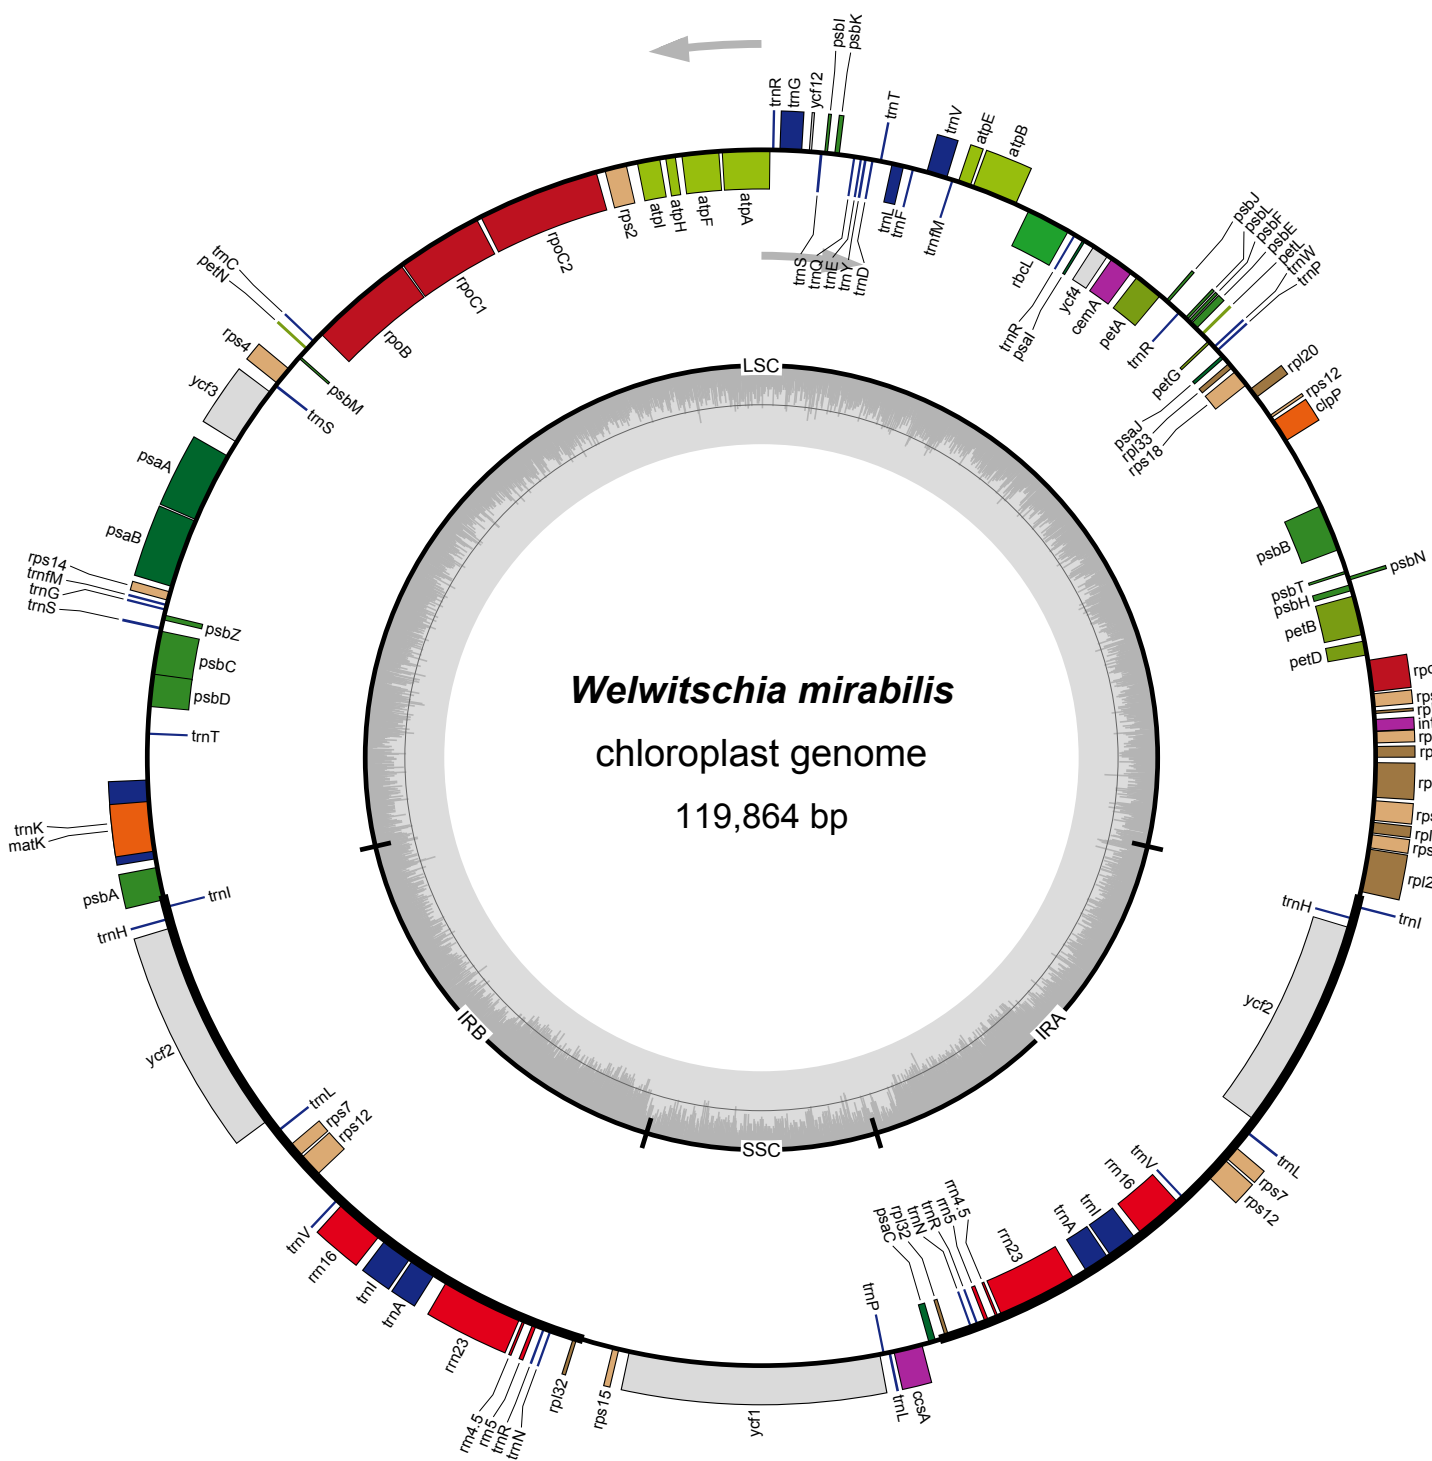

Figure S5 (continued)



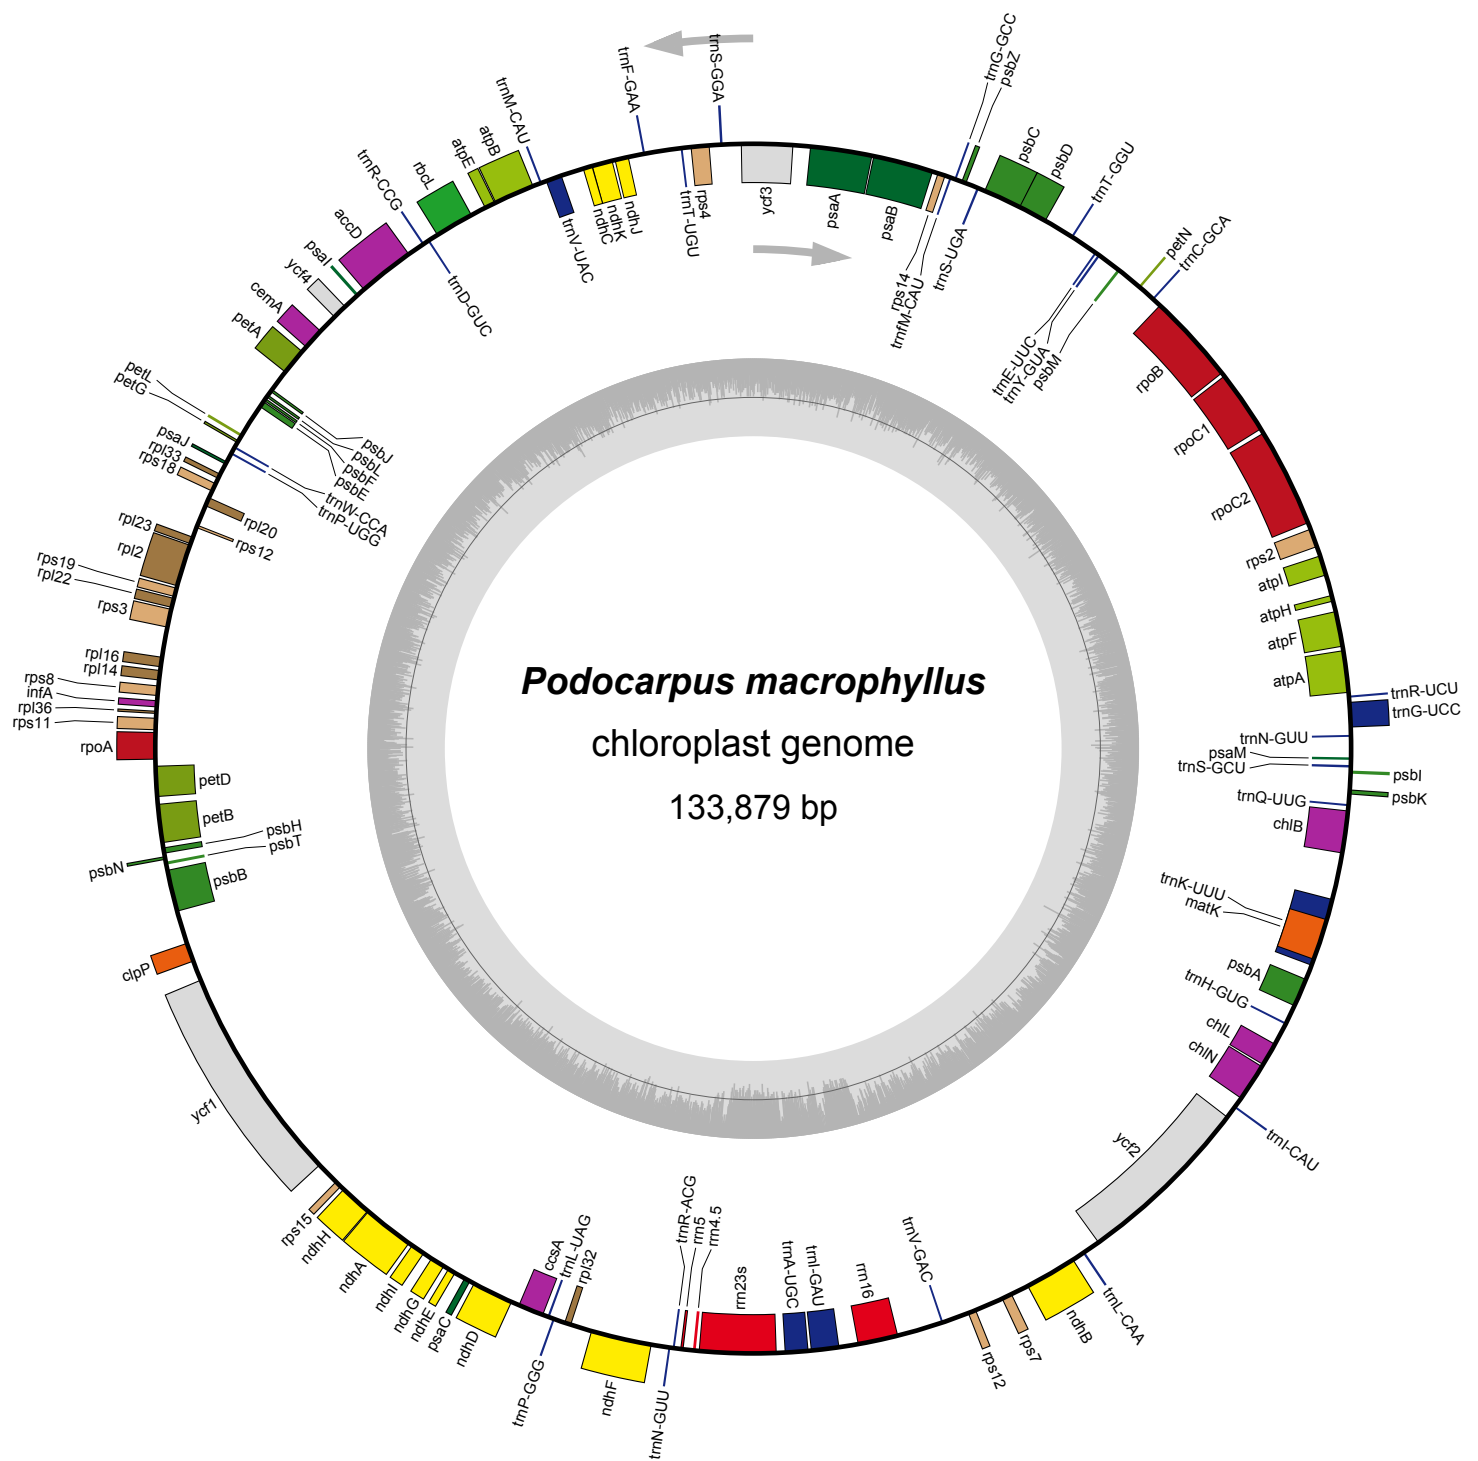

**Figure S5 (continued)**





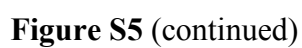

**Figure S5 (continued)**

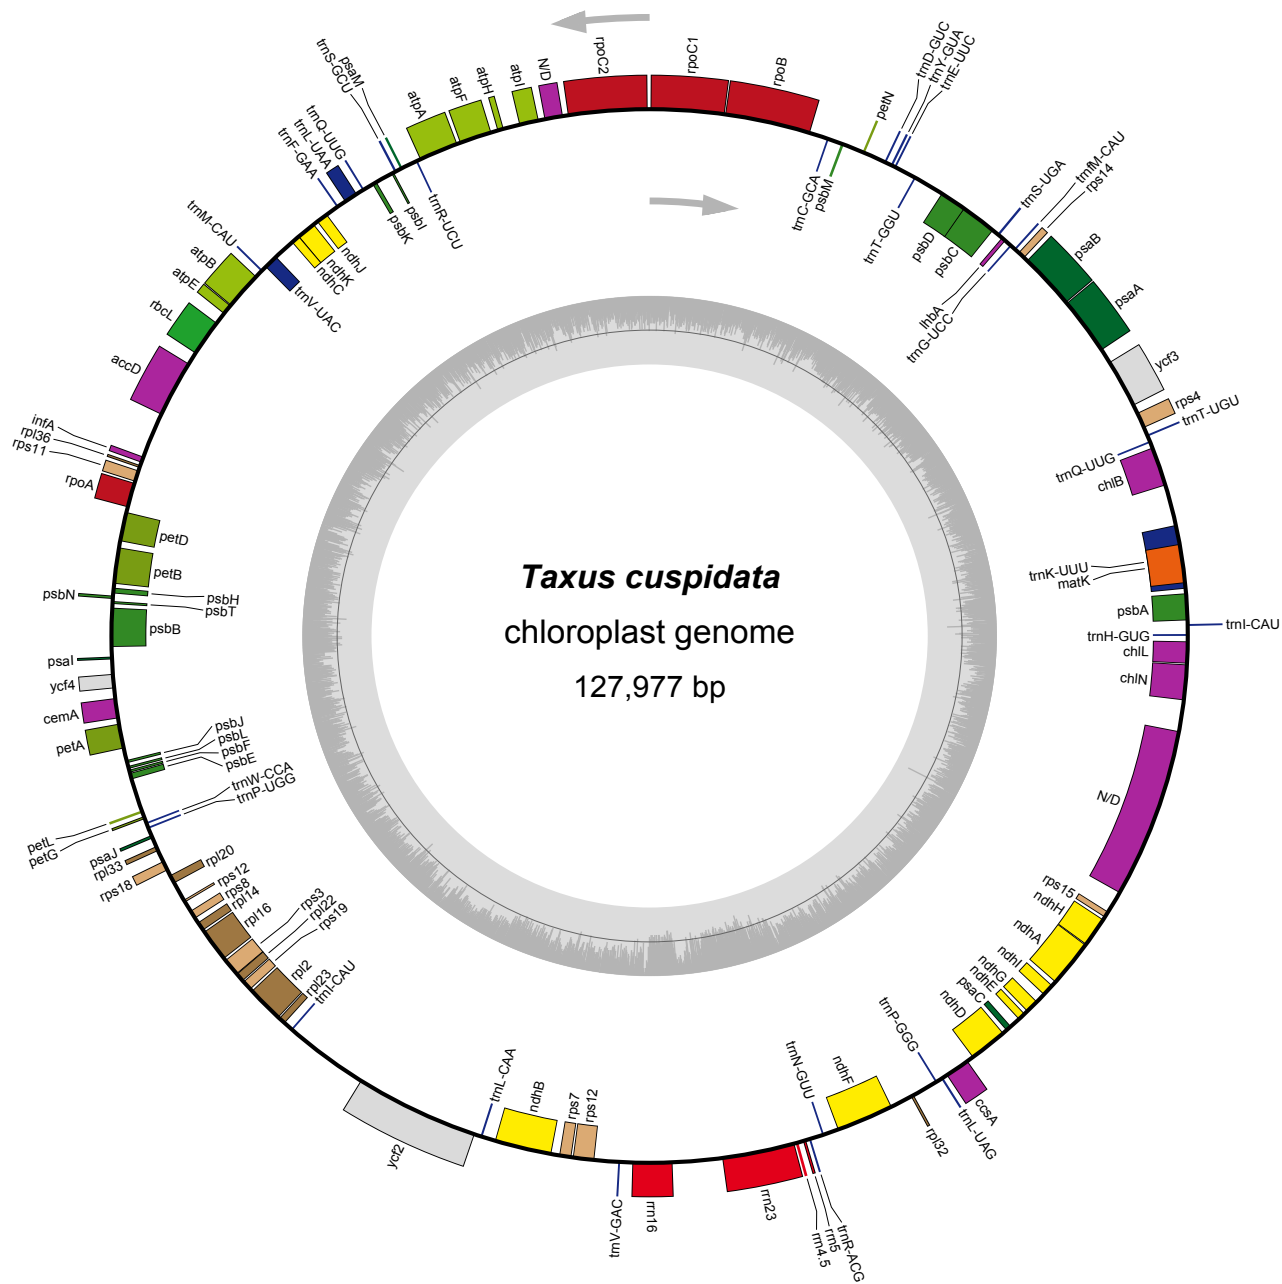

Figure S5 (continued)

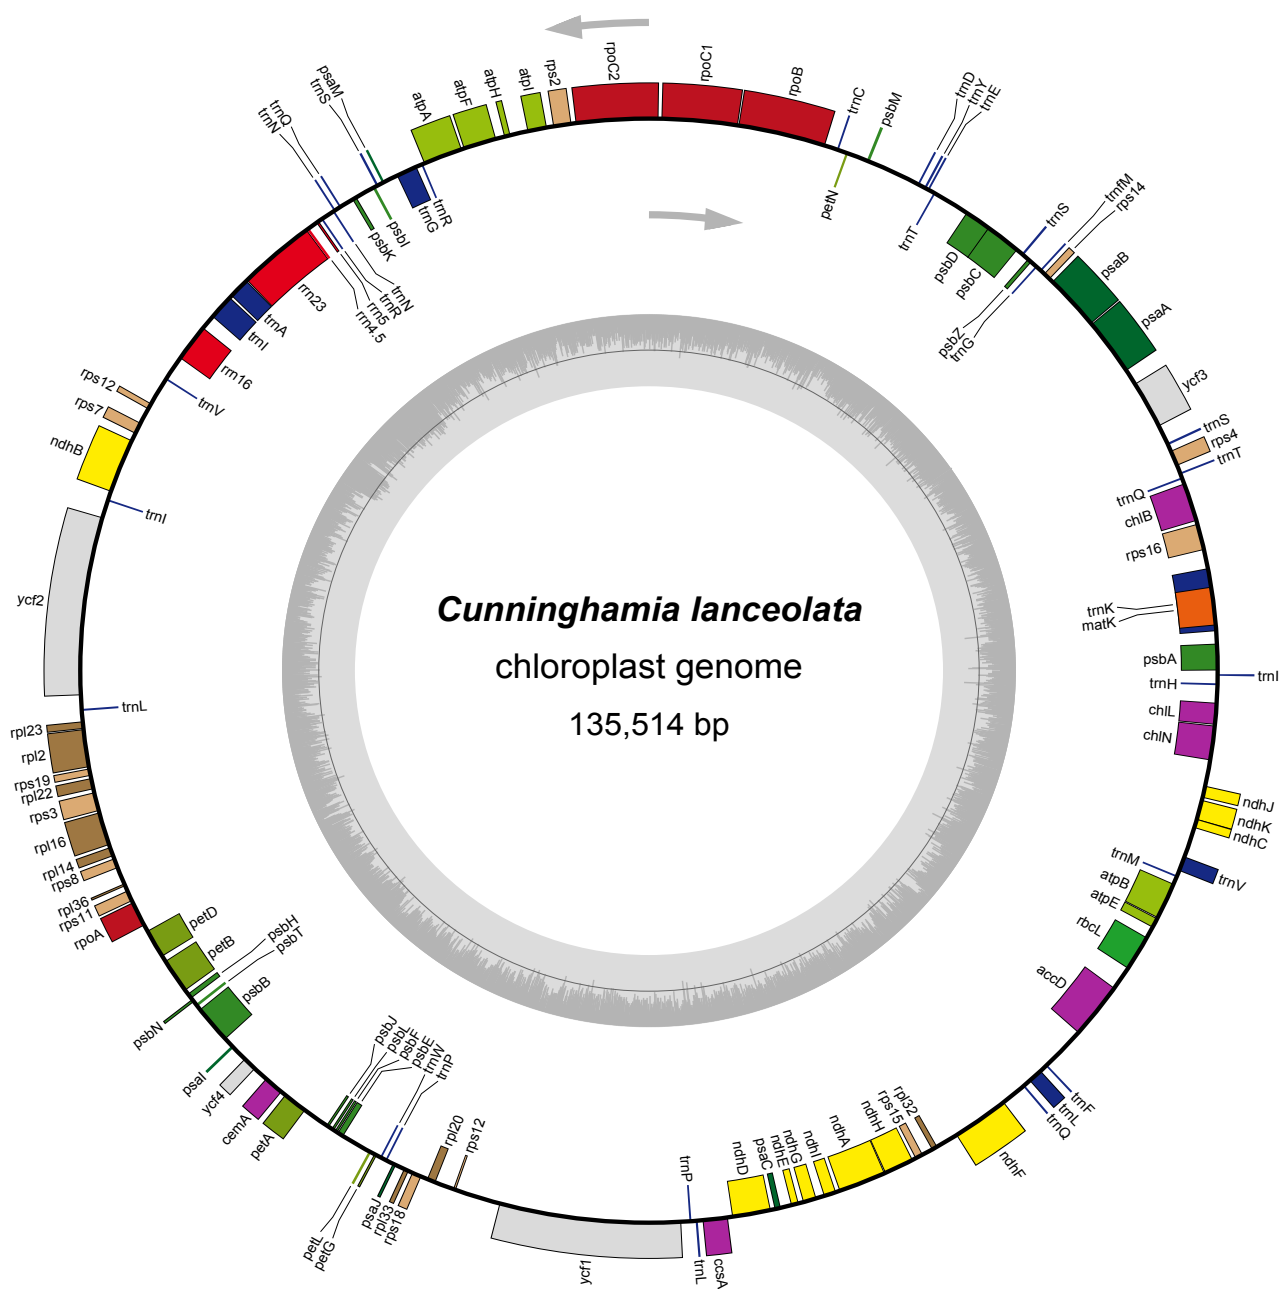

**Figure S5 (continued)**



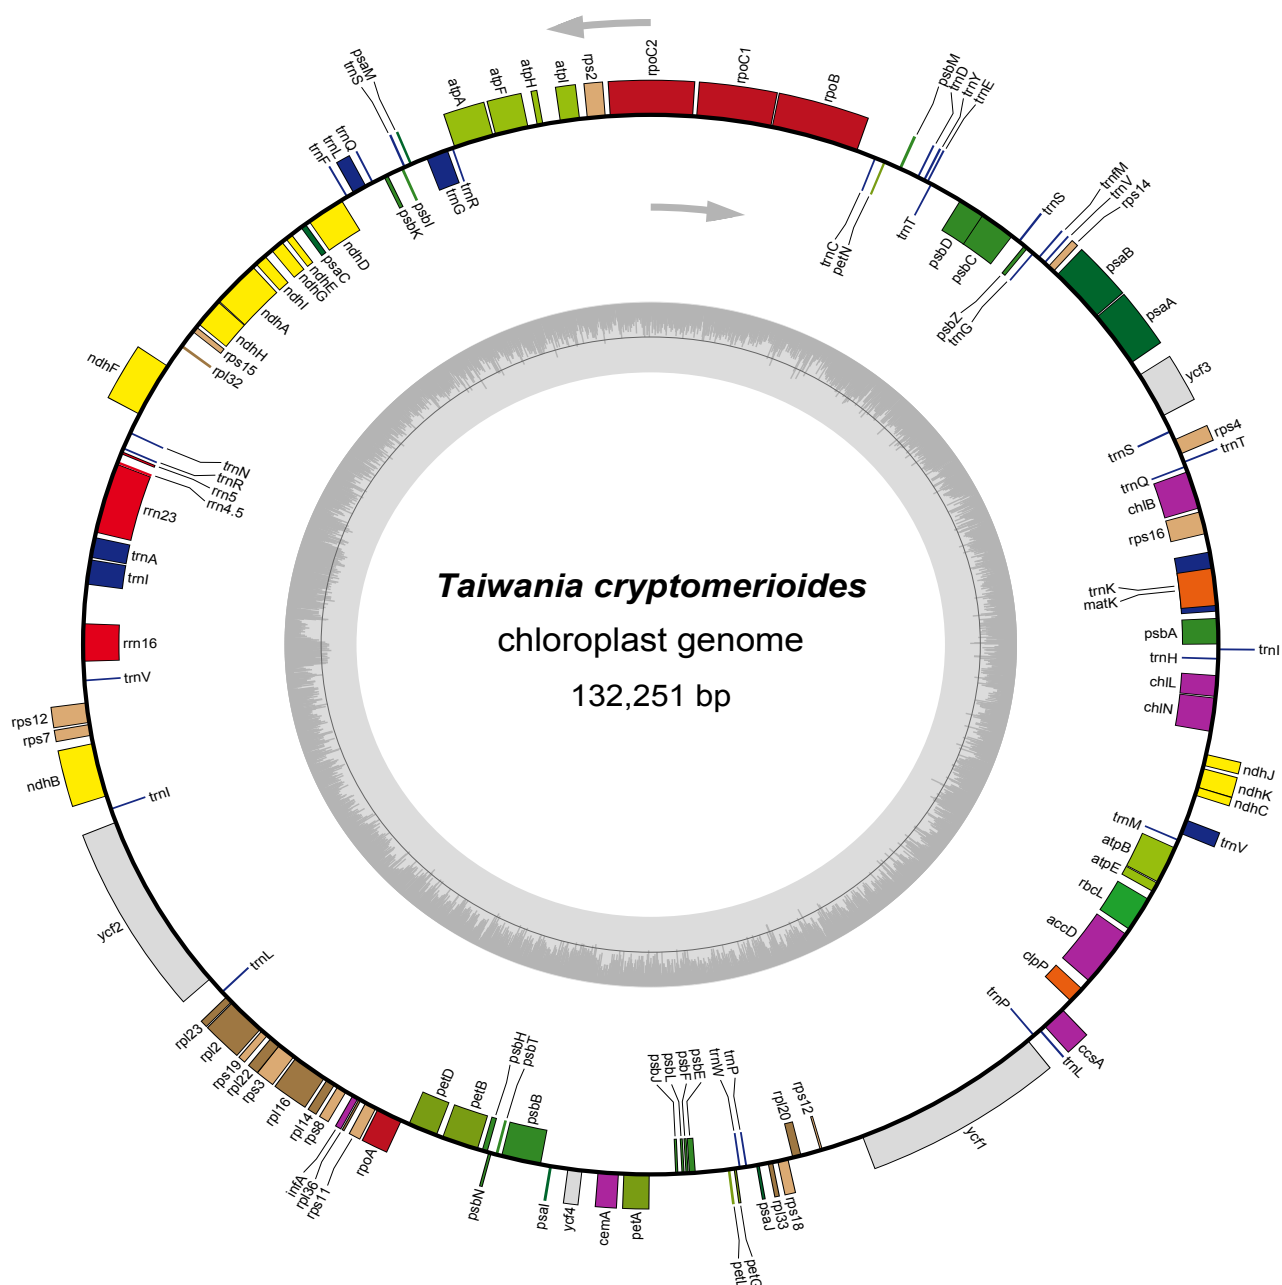

**Figure S5 (continued)**

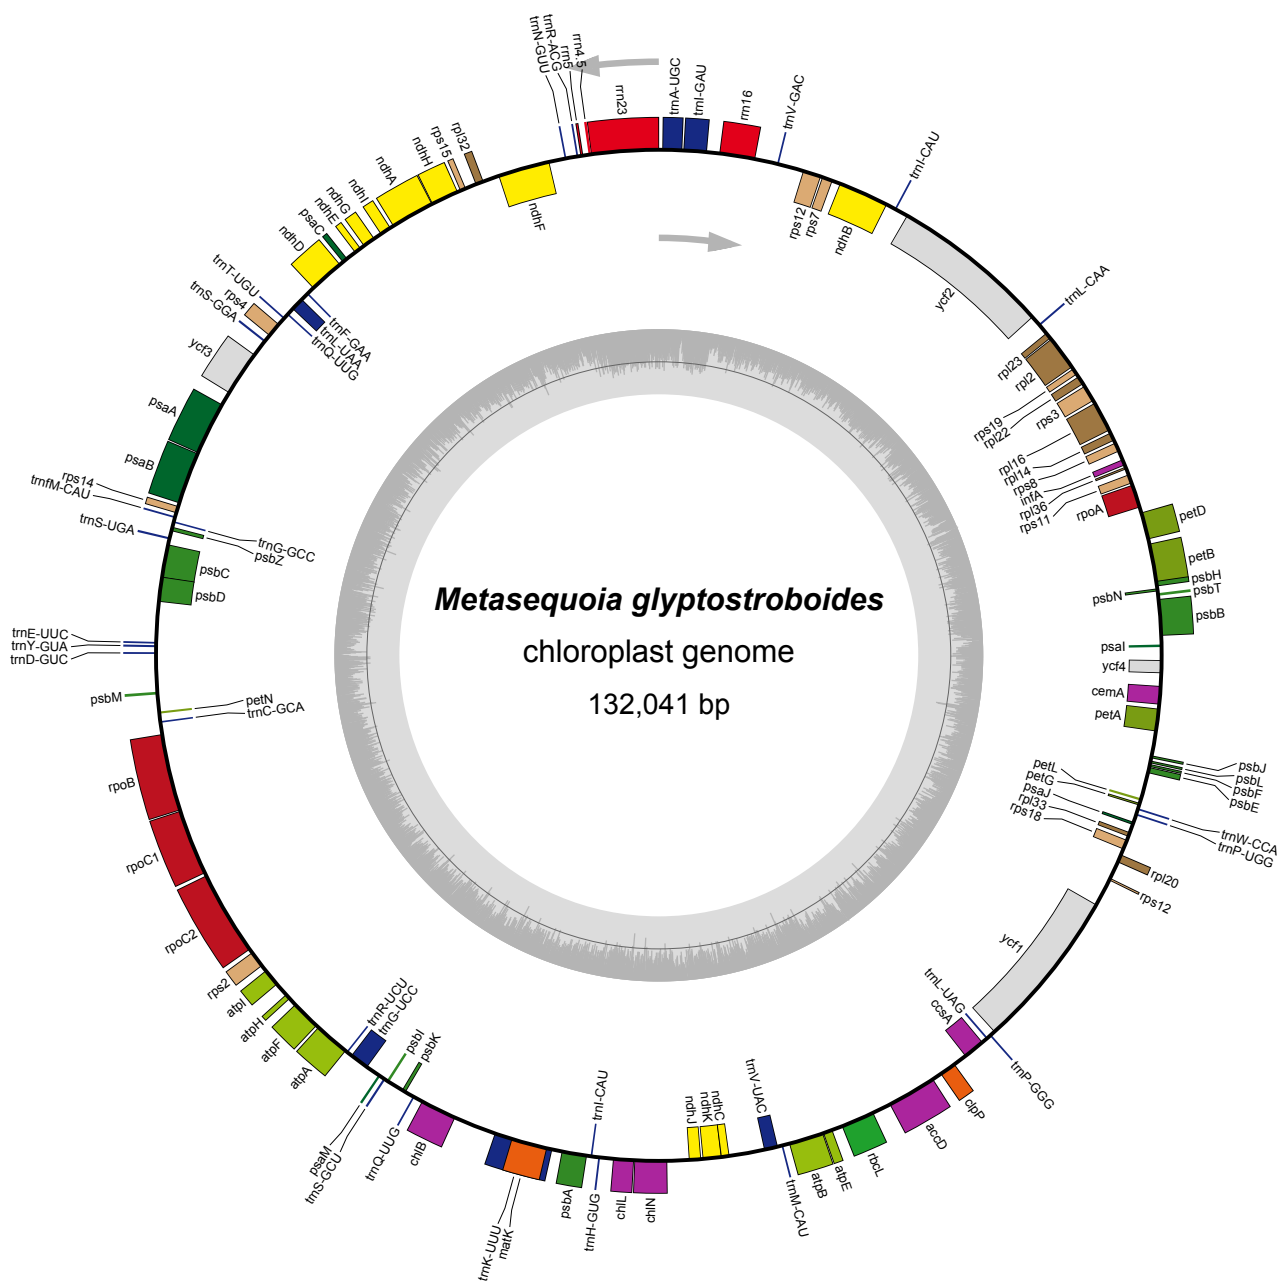

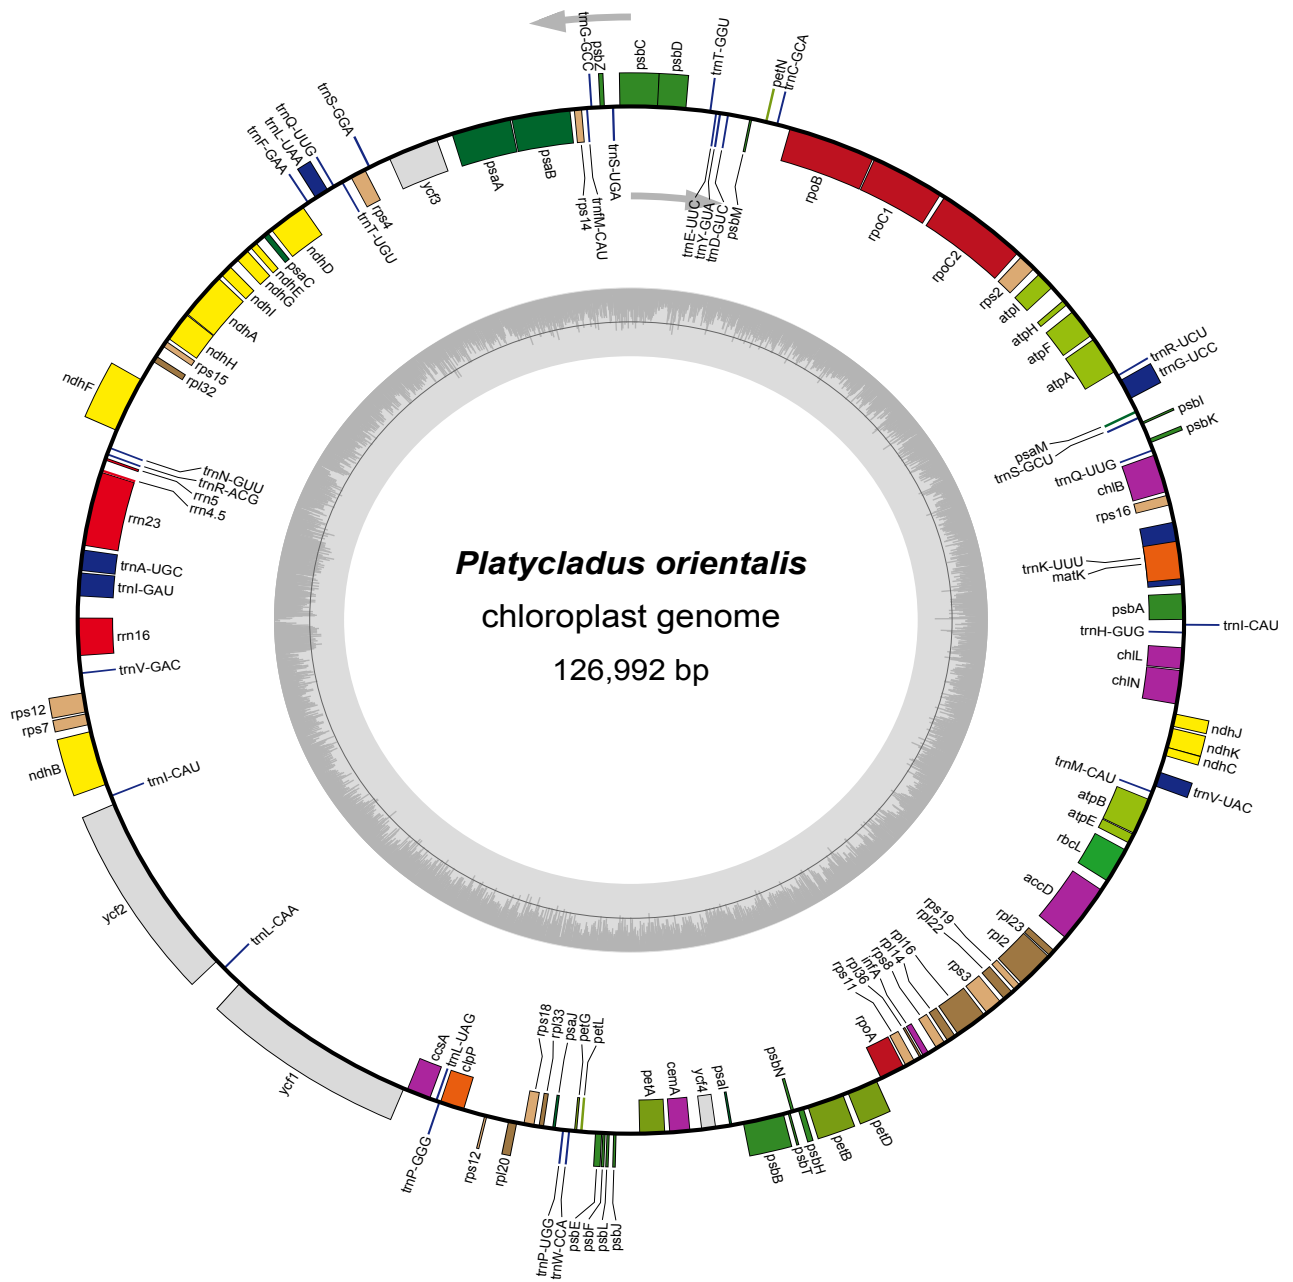

**Figure S5 (continued)**
