# Supplementary material for: A Comprehensive Evolutionary Study of Chloroplast RNA Editing in Gymnosperms: A Novel Type of G-to-A RNA Editing Is Common in Gymnosperms
Source: MDPI journal article supplement (doi:10.3390/ijms231810844), 2022-09-16
Supplement: s1 [file s1]

**Table S5.** Samples and data used in this study.

| Family          | Species                             | Abbr.               | Sources                                                                   | DNA-Seq     |                 | RNA-Seq     |                 | Accession<br>number of<br>chloroplast<br>genomes |
|-----------------|-------------------------------------|---------------------|---------------------------------------------------------------------------|-------------|-----------------|-------------|-----------------|--------------------------------------------------|
|                 |                                     |                     |                                                                           | SRA number  | Sources         | SRA number  | Sources         |                                                  |
| Cycadaceae      | <i>Cycas revoluta</i>               | <i>Cycas</i>        | IBCAS                                                                     | SRR12710844 | Kan et al. [84] | SRX3059933  | Ran et al. [27] | OM735459                                         |
| Zamiaceae       | <i>Zamia furfuracea</i>             | <i>Zamia</i>        | IBCAS                                                                     | SRR12710843 | Kan et al. [84] | SRX3059934  | Ran et al. [27] | OM735446                                         |
| Ginkgoaceae     | <i>Ginkgo biloba</i>                | <i>Ginkgo</i>       | IBCAS                                                                     | SRR12710832 | Kan et al. [84] | SRX3059931  | Ran et al. [27] | OM735452                                         |
| Pinaceae        | <i>Cedrus deodara</i>               | <i>Cedrus</i>       | IBCAS                                                                     | SRR12710827 | Kan et al. [84] | SRX3744356  | Ran et al. [34] | OM735453                                         |
|                 | <i>Abies firma</i>                  | <i>Abies</i>        | IBCAS                                                                     | SRR12710828 | Kan et al. [84] | SRX3055044  | Ran et al. [27] | OM735442                                         |
|                 | <i>Picea smithiana</i>              | <i>Picea</i>        | IBCAS                                                                     | SRR12710829 | Kan et al. [84] | SRX3052146  | Ran et al. [27] | OM735455                                         |
|                 | <i>Pinus armandii</i>               | <i>Pinus</i>        | IBCAS                                                                     | SRR12710830 | Kan et al. [84] | SRX3057314  | Ran et al. [27] | OM735456                                         |
| Ephedraceae     | <i>Ephedra przewalskii</i>          | <i>Ephedra</i>      | IBCAS                                                                     | SRR12710836 | Kan et al. [84] | SRR12710834 | Kan et al. [84] | OM735444                                         |
| Welwitschiaceae | <i>Welwitschia mirabilis</i>        | <i>Welwitschia</i>  | Buy from<br><a href="https://sheffields.com/">https://sheffields.com/</a> | SRR12710831 | Kan et al. [84] | SRX3059925  | Ran et al. [27] | OM735458                                         |
| Gnetaceae       | <i>Gnetum montanum</i>              | <i>Gnetum</i>       | Hainan, China                                                             | SRR12710833 | Kan et al. [84] | SRX3059920  | Ran et al. [27] | OM735450                                         |
| Podocarpaceae   | <i>Podocarpus macrophyllus</i>      | <i>Podocarpus</i>   | IBCAS                                                                     | SRR12710837 | Kan et al. [84] | SRX3058149  | Ran et al. [27] | OK094233                                         |
| Araucariaceae   | <i>Araucaria cunninghamii</i>       | <i>Araucaria</i>    | IBCAS                                                                     | SRR12710838 | Kan et al. [84] | SRX3057826  | Ran et al. [27] | OM735457                                         |
| Sciadopityaceae | <i>Sciadopitys verticillata</i>     | <i>Sciadopitys</i>  | KIBCAS                                                                    | SRR12710839 | Kan et al. [84] | SRX3058164  | Ran et al. [27] | OM735447                                         |
| Cephalotaxaceae | <i>Cephalotaxus sinensis</i>        | <i>Cephalotaxus</i> | IBCAS                                                                     | SRR12710840 | Kan et al. [84] | SRX3057874  | Ran et al. [27] | OM735448                                         |
| Taxaceae        | <i>Taxus cuspidata</i>              | <i>Taxus</i>        | IBCAS                                                                     | SRR10305026 | Kan et al. [85] | SRR10305025 | Kan et al. [85] | OM735454                                         |
| Cupressaceae    | <i>Cunninghamia lanceolata</i>      | <i>Cunninghamia</i> | KIBCAS                                                                    | SRR12710824 | Kan et al. [84] | SRX3058052  | Ran et al. [27] | OM735443                                         |
|                 | <i>Taiwania cryptomerioides</i>     | <i>Taiwania</i>     | KIBCAS                                                                    | SRR12710842 | Kan et al. [84] | SRR12710841 | Kan et al. [84] | OM735445                                         |
|                 | <i>Metasequoia glyptostroboides</i> | <i>Metasequoia</i>  | IBCAS                                                                     | SRR12710825 | Kan et al. [84] | SRX3058056  | Ran et al. [27] | OM735451                                         |
|                 | <i>Platycladus orientalis</i>       | <i>Platycladus</i>  | IBCAS                                                                     | SRR12710826 | Kan et al. [84] | SRX3058062  | Ran et al. [27] | OM735449                                         |

IBCAS: Institute of Botany, Chinese Academy of Sciences, Beijing, China; KIBCAS: Kunming Institute of Botany, Chinese Academy of Sciences, Yunnan, China.
