# Supplementary material for: A Comprehensive Evolutionary Study of Chloroplast RNA Editing in Gymnosperms: A Novel Type of G-to-A RNA Editing Is Common in Gymnosperms
Source: MDPI journal article supplement (doi:10.3390/ijms231810844), 2022-09-16
Supplement: s1 [file s1]

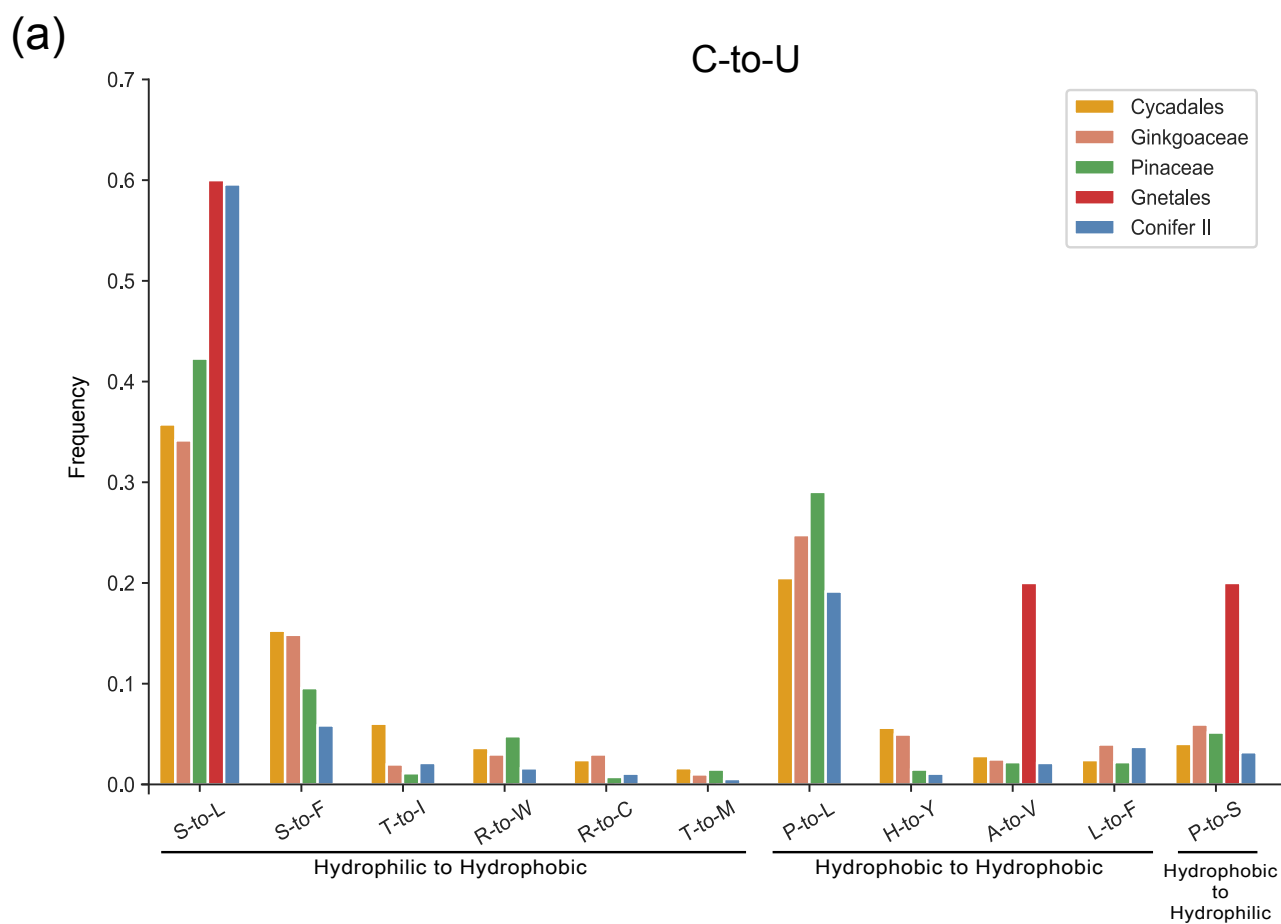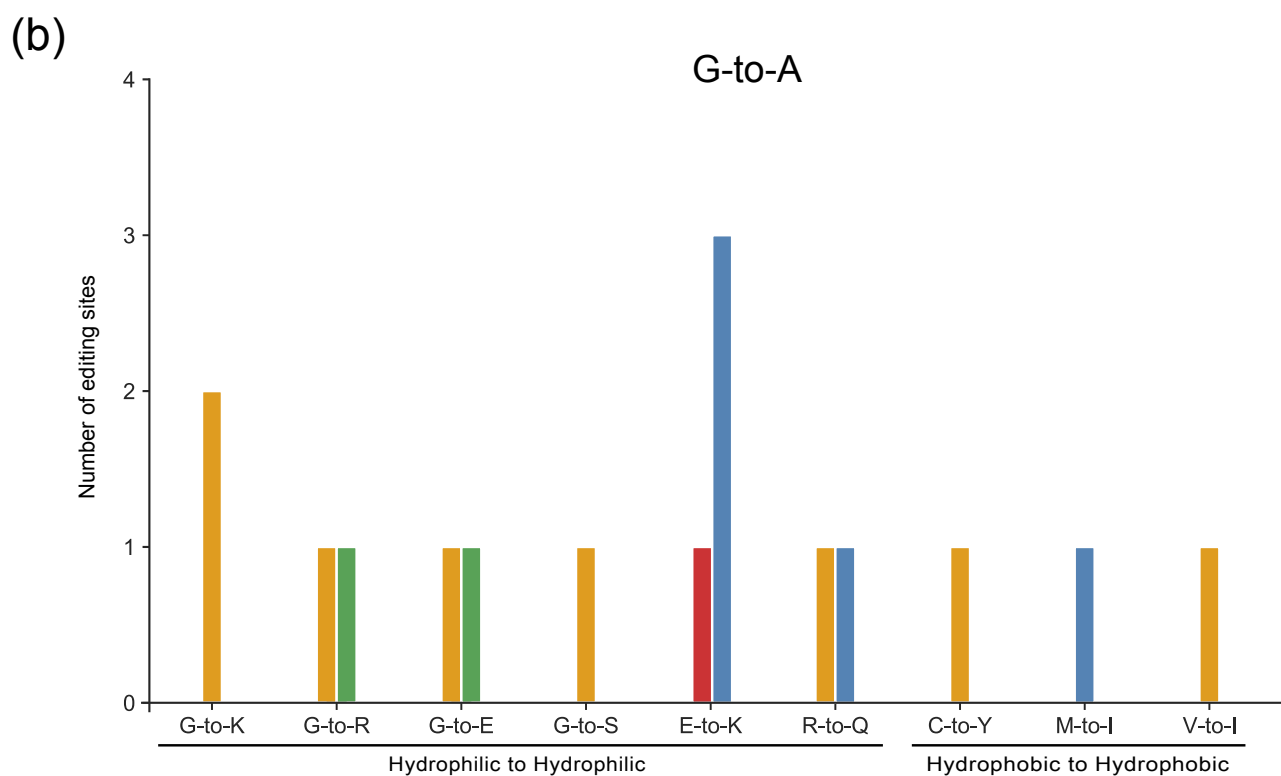

**Figure S2.** The hydrophilicity or hydrophobicity changes associated with amino acid changes that occurred in nonsilenced editing in different gymnosperm lineages. (a) C-to-U; (b) G-to-A.
