# Supplementary material for: A Comprehensive Evolutionary Study of Chloroplast RNA Editing in Gymnosperms: A Novel Type of G-to-A RNA Editing Is Common in Gymnosperms
Source: MDPI journal article supplement (doi:10.3390/ijms231810844), 2022-09-16
Supplement: s1 [file s1]

**Table S4.** G-to-A RNA editing sites in *rrn23* of the 16 gymnosperm species.

| Species                                   | Position <sup>#</sup> | Editing efficiency |
|-------------------------------------------|-----------------------|--------------------|
| <i>Cycas revoluta</i> <sup>*</sup>        | <i>rrn23</i> -3039    | 38.90%             |
| <i>Cycas revoluta</i> <sup>*</sup>        | <i>rrn23</i> -3039    | 45.40%             |
| <i>Zamia furfuracea</i> <sup>*</sup>      | <i>rrn23</i> -3039    | 36.10%             |
| <i>Zamia furfuracea</i> <sup>*</sup>      | <i>rrn23</i> -3039    | 31.70%             |
| <i>Ginkgo biloba</i> <sup>*</sup>         | <i>rrn23</i> -3039    | 54.00%             |
| <i>Ginkgo biloba</i> <sup>*</sup>         | <i>rrn23</i> -3039    | 48.69%             |
| <i>Picea smithiana</i>                    | <i>rrn23</i> -3039    | 25.90%             |
| <i>Abies firma</i>                        | <i>rrn23</i> -3039    | 39.40%             |
| <i>Cedrus deodara</i>                     | <i>rrn23</i> -3039    | 63.27%             |
| <i>Platycladus orientalis</i>             | <i>rrn23</i> -3039    | 50.20%             |
| <i>Metasequoia glyptostroboides</i>       | <i>rrn23</i> -3039    | 56.80%             |
| <i>Taiwania cryptomerioides</i>           | <i>rrn23</i> -3039    | 47.40%             |
| <i>Cunninghamia lanceolata</i>            | <i>rrn23</i> -3039    | 33.57%             |
| <i>Cephalotaxus sinensis</i>              | <i>rrn23</i> -3039    | 32.60%             |
| <i>Taxus cuspidata</i>                    | <i>rrn23</i> -3039    | 53.29%             |
| <i>Sciadopitys verticillata</i>           | <i>rrn23</i> -3039    | 50.80%             |
| <i>Araucaria cunninghamii</i>             | <i>rrn23</i> -3039    | 36.43%             |
| <i>Welwitschia mirabilis</i> <sup>*</sup> | <i>rrn23</i> -3039    | 63.40%             |
| <i>Welwitschia mirabilis</i> <sup>*</sup> | <i>rrn23</i> -3039    | 55.30%             |
| <i>Gnetum montanum</i> <sup>*</sup>       | <i>rrn23</i> -3039    | 57.69%             |
| <i>Gnetum montanum</i> <sup>*</sup>       | <i>rrn23</i> -3039    | 49.85%             |

<sup>#</sup>The position is based on the alignment of the *rrn23* genes

<sup>\*</sup> Both copies of *rrn23* have G-to-A RNA editing sites
