# Supplementary material for: A Comprehensive Evolutionary Study of Chloroplast RNA Editing in Gymnosperms: A Novel Type of G-to-A RNA Editing Is Common in Gymnosperms
Source: MDPI journal article supplement (doi:10.3390/ijms231810844), 2022-09-16
Supplement: s1 [file s1]

**Table S6.** Primers used in this study.

| Primer name      | Primer Sequences (5' to 3')  |
|------------------|------------------------------|
| gap3_F1_Ara_cun- | TTGCGCATTACCGTTAATCCAT       |
| gap3_R1_Ara_cun- | TGTACATACCAGATCACGAATTAGT    |
| gap3_F2_Ara_cun- | TAGAATGGCAGAGGCCAATAGAGCT    |
| gap3_F3_Ara_cun- | GCGCATTACCGTTAATCCATTCCAT    |
| gap3_R2_Ara_cun- | GCAAGATTGTTATGCTCAGTAC       |
| gap3_R3_Ara_cun- | GTACATTGAATGTATTCCACGG       |
| gap1_F1_Cep_sin- | AAGGCCAACTGTGCCAACTGT        |
| gap1_R1_Cep_sin- | CTTGCTCGAACGTAAATAACT        |
| gap1_F2_Cep_sin- | AATCCAGGAAAATATGTGCC         |
| gap2_F1_Cep_sin- | CATATCTTCTAGATAGGCCATGT      |
| gap2_R1_Cep_sin- | TCTTGTGCTACAGAAGACGAATT      |
| gap5_F1_Cep_sin- | TATAGAAGACTTGGATCGGACCACCT   |
| gap5_R1_Cep_sin- | TACAAGAGCCTACAAGAGCCTAT      |
| gap6_F1_Cep_sin- | TAGCTGGGATCACGTGAAATT        |
| gap6_R1_Cep_sin- | GTTTGTACTTGAGGTGCCAAT        |
| gap7_F1_Cep_sin- | TACTCCTTGTCAAACCTTGATAGGT    |
| gap7_R1_Cep_sin- | TTAACATAACAGCTGGCCATAT       |
| gap8_F1_Cep_sin- | TATCCATGTGGCTAATAGCCTT       |
| gap8_R1_Cep_sin- | CATAATTCATGGACGTTGATAAGGT    |
| gap8_F2_Cep_sin- | TCAGGCGTTGATGAGCACATT        |
| gap8_R2_Cep_sin- | GGAACAAGTGGATATGATCGATCCT    |
| gap8_F3_Cep_sin- | TACGCCATGCTACTGTGCCTTGTAT    |
| gap8_R3_Cep_sin- | TCGGCAGTGACTTACGTCACCTT      |
| gap8_F4_Cep_sin- | TCCATGTGGCTAATAGCCTTCACAGC   |
| gap8_R4_Cep_sin- | TCGGCAGTGACTTACGTCACCTTACGAT |
| gap8_F5_Cep_sin- | GAACAGAAGGAGTACGCCATGCTACTGT |
| gap2_F1_Cyc_rev- | TACGGAGATTAGCTGAACTAACTT     |
| gap2_R1_Cyc_rev- | TCAGTAGAAAGATTACTGCCAAT      |
| gap2_R2_Cyc_rev- | TCGATCTATCGATACAGAGAAT       |
| gap5_F1_Eph_mer- | GGCATAACAGCTTTCTGGATGT       |
| gap5_F2_Eph_mer- | TAATACCGCGGATTGACCTTCT       |
| gap5_R1_Eph_mer- | CCATTCAAGTTGAACGCCATAGT      |
| gap6_F1_Eph_mer- | TTCTTAAGAGCAGCGTGTCTACCTAT   |
| gap6_R1_Eph_mer- | TGCCGTCAATACAGCTACTGAGT      |
| gap6_R2_Eph_mer- | AGAGCGTGATGATGACATGTAC       |
| gap1_F1_Pin_arm- | GCAGTAGGAATTGCAAGGAACATT     |
| gap1_R1_Pin_arm- | CGACATCGATATCTGTTCATATCGT    |
| gap1_R2_Pin_arm- | TCATCGACCTAGCACTCGCATAAT     |
| gap2_F1_Pin_arm- | TTCGTGAATCGCTAACGAACCT       |
| gap2_R1_Pin_arm- | TGGAATGAATCAGACCGAGCTT       |
| gap3_F1_Pin_arm- | TGATCCTGTAATTAGGAAATCGTCCT   |

| Primer name      | Primer Sequences (5' to 3') |
|------------------|-----------------------------|
| gap3_F2_Pin_arm- | TAGCAGTTCCAATGCTACGCCTT     |
| gap5_F1_Pin_arm- | TCCGTATAGAACGTAATTACACCT    |
| gap5_R2_Pin_arm- | CGATATATCGTATCGGCTGAT       |
| gap8_F1_Pin_arm- | TATCGATCGGACATGTGGCTT       |
| gap8_R1_Pin_arm- | TCTACTCAAGAGCGAAGCTAT       |
| gap8_R2_Pin_arm- | TAGGAAGTCAGTCTCTAGGTT       |
| gap9_F1_Pin_arm- | GGATTTGGTCCATGGATTGCAT      |
| gap9_R1_Pin_arm- | GCTAGATCGGATCAAACATGCT      |
| gap9_F2_Pin_arm- | GCTCTATGAATCGATTGTAAGAT     |
| gap1_F1_Pla_ori- | TAGAGTCCAATTCTACATGTCAATGT  |
| gap1_R1_Pla_ori- | CTGTGTATCATACTAGCACAGT      |
| gap1_R2_Pla_ori- | GTGTATATGCCAGGAACCAGATT     |
| gap3_F1_Pla_ori- | TTATTCGATCCCGAATCGACATT     |
| gap3_R1_Pla_ori- | TAGCAAACCTTTGAACCGACTTCTACT |
| gap1_F1_Pod_mac- | TGTCCAGACTATTGGACATGTCT     |
| gap1_R1_Pod_mac- | TCCTGACGGAACGAATCACACT      |
| gap1_F2_Pod_mac- | TATGTACTTCGGACTGTTCTCT      |
| gap2_F1_Pod_mac- | TCTGTTACTGGTTGTCCACCGAT     |
| gap2_R1_Pod_mac- | TGGTCCGTTCCAATATCAGGAT      |
| gap3_F1_Pod_mac- | GTTAATTGCTTCCACTGATCGT      |
| gap3_R1_Pod_mac- | TTGTGCAATATGCCGACGCTGGTT    |
| gap3_F2_Pod_mac- | GTATCGGCTAATAGCTGTTAT       |
| gap3_R2_Pod_mac- | TGCATCAGGATAAATGGAATT       |
| gap4_F1_Pod_mac- | TTGAACCAAGCCTCCGCAATT       |
| gap4_R1_Pod_mac- | CAGTGGTGTAGCATCAGATCCT      |
| gap5_F1_Pod_mac- | CTATTGCTGAACCTAAAGCGT       |
| gap5_R1_Pod_mac- | TATAAGACCGAATGAGCGATAGGT    |
| gap6_F1_Pod_mac- | GCAGAAGTGGAACCTAAGATACCT    |
| gap6_R1_Pod_mac- | CAATCTCGTCGTCAAGTGGCTT      |
| gap6_F2_Pod_mac- | GTCCAGGATGTGTACAGAGAAT      |
| gap6_R2_Pod_mac- | GCTCTTGAGTTACATCATCAAGACT   |
| gap6_R3_Pod_mac- | GAGAACCACTGAAAATTACTTGGCT   |
| gap6_R4_Pod_mac- | AATAGCGCACACGATTGGTGCAGCGAT |
| gap7_F1_Pod_mac- | GAGCTCAATTCCTATTACTCCGAAT   |
| gap7_R1_Pod_mac- | CTCAGAGGTACTTCATAATCAGCTT   |
| gap7_F2_Pod_mac- | TCTGAATGAAGTAGCAGAGCT       |
| gap7_R2_Pod_mac- | GGTGTTCTAGTTCTGGATACT       |
| gap9_F1_Pod_mac- | CATGTCTGCTATCTCTAGGAGGT     |
| gap9_R1_Pod_mac- | TATGCCTTGAAGAGGACTCGAACCT   |
| gap8_F1_Pod_mac- | GCACTGATTGCTGATACGAGAT      |
| gap8_R1_Pod_mac- | TAGCTCAGAGGATTAGAGCACGT     |
| gap8_R2_Pod_mac- | TCTACTGCGGTGACGATACTGT      |
| gap8_F3_Pod_mac- | TACAGTATCGTCACCGCAGTAGAGT   |

| Primer name        | Primer Sequences (5' to 3') |
|--------------------|-----------------------------|
| gap8_R3_Pod_mac-   | TAAGGTCACGGTGAGACTAGCCGTT   |
| gap8_F4_Pod_mac-   | TCAGTTCACCAGGTTGTCTCTT      |
| gap8_R4_Pod_mac-   | TACGACTACGATAGGTGTCAAGT     |
| gap8_F5_Pod_mac-   | GAACTATCTATGTGGCTGATAGCCT   |
| gap8_R5_Pod_mac-   | TCTATCGTTGGTTCCGAAGGT       |
| gap8_R6_Pod_mac-   | CTGCAAGACCAATAATGCAGATCT    |
| gap8_F7_Pod_mac-   | TCTCAGACCAGCTACTGATCGT      |
| gap8_R7_Pod_mac-   | TCATCGGTTCAACGATGAGCACT     |
| gap8_F8_Pod_mac-   | TGATCGTAGCCTTGGTAAGCCATT    |
| gap8_R8_Pod_mac-   | TATCTGAAGCAGGTCGCTCAAT      |
| gap8_F9_Pod_mac-   | AGCAATACAAGCCGCCTAGTGT      |
| gap8_R9_Pod_mac-   | TCACCTTGACGTGGTGATAGTCAT    |
| gap8_F10_Pod_mac-  | TCCAGGTGACACTCTACCACTGAGTT  |
| gap8_R10_Pod_mac-  | TTGACACTAGGCGGCTTGTATT      |
| gap8_F11_Pod_mac-  | TGTGAAGTTATCCTATCGCATG      |
| gap8_R11_Pod_mac-  | TTCCTGACAAGCAAGGTTGAACCT    |
| gap8_F12_Pod_mac-  | CATGAACGGAAGTTACATAACTTC    |
| gap8_R12_Pod_mac-  | TGACATGAACATGATAGGTGAGCT    |
| gap8_R13_Pod_mac-  | TAACTCAGTGGTAGAGTGTCACCT    |
| gap9_F2_Pod_mac-   | GATGGCAGGCAGGTTTCCTATT      |
| gap9_R2_Pod_mac-   | TCAGGAATTATTGAGCAGCAGCGAT   |
| gap9_F3_Pod_mac-   | GAGGTATTCCCTCCATTGGCAGGTT   |
| gap9_R3_Pod_mac-   | CGTACTCTCAGCCTATTGAGAGAAT   |
| gap11_F1_Pod_mac-  | GACTCAGTCAGATAGGACTTGTT     |
| gap11_R1_Pod_mac-  | TAACCATTTCAGCCATGGATGCTAGT  |
| gap11_F2_Pod_mac-  | GTAGATCGCGTAGAATTAACGT      |
| gap11_R2_Pod_mac-  | TAGCTATCACTGGAATGGCTCATGCT  |
| gap11_F3_Pod_mac-  | TAGCATCCATGGCTGAATGGTT      |
| gap11_R3_Pod_mac-  | AGGCAGCGATCGGATCGAAT        |
| gap11_F4_Pod_mac-  | CAACTGGTCGTGGATTTACCGAT     |
| gap11_R4_Pod_mac-  | TGACCGTAACCAGAGAATGT        |
| gap11_F5_Pod_mac-  | TGACCACGTCTGGCTAGAGCAATT    |
| gap11_R5_Pod_mac-  | CAACATGTGTGAGTTCATGGT       |
| gap11_F6_Pod_mac-  | GAATTGCGGTCATGGTTAGAACT     |
| gap11_R6_Pod_mac-  | TGCTTCTTGAGCAATTGCCAGGAT    |
| gap11_F7_Pod_mac-  | GCCGAGTACTCTACCATTGAGTT     |
| gap11_R7_Pod_mac-  | TACTGCTAAATACGCTCTGTTGT     |
| gap11_F8_Pod_mac-  | TGAAGGAAGTAGCTACTCGTAATGT   |
| gap11_R8_Pod_mac-  | CTGTTGAAGTAATGTATGCGGCT     |
| gap11_R9_Pod_mac-  | CGGCATCGTCTAGAAGAATATT      |
| gap11_F10_Pod_mac- | GCGTGCAATTAAGAGCATATACCT    |
| gap11_R10_Pod_mac- | TTGCGAGATACATGCACACGGAT     |
| gap11_R11_Pod_mac- | TCAAGCTGCTGAATTAGCACT       |

| Primer name        | Primer Sequences (5' to 3')  |
|--------------------|------------------------------|
| gap2_F1_Sci_ver-   | TAGTAGAGGTGCCTACTACCTT       |
| gap2_R1_Sci_ver-   | CAGGTCGGAACAAGTTGATTGCAAAT   |
| gap2_R2_Sci_ver-   | AGTTCATGAGATAGCTCATTAT       |
| gap1_F1_Tai_cry-   | TGAACTATCTATGTGGCTGATAGCT    |
| gap1_R1_Tai_cry-   | TGAAGTTCATAAGTCAGCTCAT       |
| gap2_F1_Tai_cry-   | TCCGACTTGCATGTGTTAAGCAT      |
| gap2_R1_Tai_cry-   | TTGACGTGGTGAAAGCCATCAGTT     |
| gap1_F1_Tax_cus-   | TGTGCTACTCAACATTCTGGAT       |
| gap3_F1_Tax_cus-   | TATCTTTCGGCATTGTCGACCAAGT    |
| gap3_R1_Tax_cus-   | GTGATACTCCTTATGCAATGTACGAT   |
| gap5_F1_Tax_cus-   | TGCAGTGTATAGATCTGCATTATCACT  |
| gap5_R1_Tax_cus-   | GAATTTTCGTTTCGGATTCAGAGGATAT |
| gap3_F4_Ara_cun*   | TGCGCATTACCGTTAATCCATTCCAT   |
| gap3_R4_Ara_cun*   | TGTATTCCACGGATAGAGGAAT       |
| gap3_F5_Ara_cun*   | TTAATAAGTTCTCTCGGTCGG        |
| gap3_R5_Ara_cun*   | GCTGATCATAGGTTCTTCTCTCCATCG  |
| gap8_F2_Pin_arm*   | CCGAACAACCTGTTTCGAGAGTT      |
| gap8_F3_Pin_arm*   | TATCGGACTTGAACCGATGACT       |
| gap8_R3_Pin_arm*   | TGAGAGCTAGAATACTTGCTGTGCT    |
| gap8_R4_Pin_arm*   | CGCGTAGGTTACTACTAATCG        |
| gap1_F2_Tai_cry*   | TTGTCACCTCTTATAATTAG         |
| gap1_R2_Tai_cry*   | TCGAGACAAGTTGATAGATTACAT     |
| gap1_F3_Tai_cry*   | GTAGTTAAACCAATCAATGTT        |
| gap1_R3_Tai_cry*   | TATAAGAGGTGACAAGAAAGT        |
| Abi_fir_T1F1_pri#  | GTAGCTCGCAAGGCTCATAACCTT     |
| Abi_fir_T1R1_pri#  | TCATTATGGATCGGATCAGTCCT      |
| Abi_fir_T2F1_pri#  | TTAGGTAGAGCTCCATCACCTT       |
| Abi_fir_T2R1_pri#  | TATCGTATTGGCCGATAAGCTCT      |
| Ced_deo_T3F1_pri#  | TCTGTGCAACAGGTATTGGAAGT      |
| Ced_deo_T3R1_pri#  | TATCCTTGATCGGTACTGCAGT       |
| Cyc_rev_T10F1_pri# | TATTATTCACGAGGAGCCGGAT       |
| Cyc_rev_T10R1_pri# | TCCAGATGTGATCCAAGCAGGTT      |
| Cyc_rev_T10F2_pri# | CCGTGACTGCATAGGATTATAT       |
| Cyc_rev_T11F1_pri# | TTGGCCTGGACTGGTCTAACAGAT     |
| Cyc_rev_T11R1_pri# | CTGGCAATTGCTCAATGAACAT       |
| Cyc_rev_T11R2_pri# | CTATGTCAACCGAGGTTCTAGAT      |
| Pod_mac_T13F1_pri# | GCATTCCGCATCATTGTACAGAT      |
| Pod_mac_T14F1_pri# | CAACGCCTAATGACTACCGCTATT     |
| Pod_mac_T14R1_pri# | TGCGCTTGATAATCCAATCCGTT      |
| Pod_mac_T14R2_pri# | TTGCCTATCTAGAAGGTGCCTAACT    |
| Pod_mac_T15F1_pri# | TTCGATCCTTCGTCGACGTAAGT      |
| Pod_mac_T15F2_pri# | GTAGTTATGAATCCTGTGGACCAT     |
| Pod_mac_T15R1_pri# | TGAGCAGACATACGTATCTGT        |

| Primer name        | Primer Sequences (5' to 3') |
|--------------------|-----------------------------|
| Pod_mac_T15R2_pri# | CATCAGTTCCAGTATCATAAAGTGCT  |
| Tai_cry_T4F1_pri#  | TGGAGAACTATAGCATTCCTCGCGT   |
| Tai_cry_T4F2_pri#  | GGCAATTGTTGCTTCTCTAGGAT     |
| Tai_cry_T4R1_pri#  | TCAGCCTTCGATGCAGAGTAT       |
| Tax_cus_T5F1_pri#  | TGGATAGCATGCTCCATAATGCAT    |
| Tax_cus_T5F2_pri#  | GCAGACATACGTATATGTCTAGCT    |
| Tax_cus_T5R1_pri#  | TCAATCCTTCGTCGACGTAAGTAGT   |
| Tax_cus_T6F1_pri#  | TCTATGTCCATCTGTGGTGTGACAT   |
| Tax_cus_T6R1_pri#  | CTGCTAGAAGTCTCTCTAGCAAGAT   |
| Tax_cus_T12F1_pri# | TCAATAGATTCTGTTGGAGAG       |
| Tax_cus_T12R1_pri# | TGAATGCTGGTTAATTGCATCT      |
| Tax_cus_T12F2_pri# | TGCAAATGACAAGAGTATACTCTC    |
| Tax_cus_T12R2_pri# | TATTCGATCTGAATGGACGAT       |
| Wel_mir_T7F1_pri#  | TAACAGCCAGTATCGTGGATCGT     |
| Wel_mir_T7R1_pri#  | GATAATGGCACCTGATACTT        |
| Wel_mir_T7R2_pri#  | GCCGAGTACTCTACCATTGAGTT     |
| Wel_mir_T8F1_pri#  | GCTTAGCAGACACCTTGGAACACAT   |
| Wel_mir_T8R1_pri#  | TAGCCGATAGAGCGGCGTATAAT     |
| Wel_mir_T9F1_pri#  | TTCCGAGATGAACTGGTAGATT      |
| Wel_mir_T9R1_pri#  | GCTGCTATTCAAGGTCGCATTGAT    |
| Wel_mir_T9F2_pri#  | TCCGCGATATAACGTCTCGTAC      |
| Gne_1_R1_primer+   | TTGCCCTGCGAGATTTGTTGAT      |
| Gne_2_F1_primer+   | ACAATACATTTCTGGGTTCT        |
| Gne_2_R1_primer+   | ACCAAACCGAGTAACTGCCTAT      |
| Gne_3_F1_primer+   | ATTTGTGCTGAATGCCTGTCCC      |
| Gne_3_R1_primer+   | TCGACCGATCCTTCCCAGTTTACAT   |
| Gne_4_F1_primer+   | GGCTAAACCCTATTTGTCCACT      |
| Gne_4_R1_primer+   | TGGTTTGATAGTGGATTGCCTC      |
| Gne_5_F1_primer+   | TAGAACATAATGATGCGACCCG      |
| Gne_5_R1_primer+   | TACCCACGAACCTACTCTAACAAG    |
| Gne_6_F1_primer+   | GTTCTACGGGAGATGCTTACTG      |
| Gne_6_R1_primer+   | TTACGGTCAACAAAGGCGAAGC      |
| Gne_7_F1_primer+   | CGGGCATTAGTTTAGAACCACG      |
| Gne_7_R1_primer+   | CTGGAAGTGCATCCTAACTCT       |
| Gne_8_F1_primer+   | AACCTCCACCGACATCTCCATT      |
| Gne_8_R1_primer+   | CGCCCATGTATTGTTGATTCTG      |
| Gne_9_F1_primer+   | TGGAATAACTCCCAATACAAGACTC   |
| Gne_9_R1_primer+   | AACCCAAGAAATCCACAAACTG      |
| Gne_9_F2_primer+   | CAACAAATCTCGCAGGGCAAAGT     |
| Gne_9_R2_primer+   | GATTGAATCATATCGGTTACACT     |
| Gne_9_F3_primer+   | TTCGACCTAACCGGACCTATT       |
| Gne_9_R3_primer+   | GCAGCGTGTTTCCTCAAACCT       |
| Gne_10_F1_primer+  | ATTATGGGACAGGGTCGGATTC      |

| Primer name       | Primer Sequences (5' to 3') |
|-------------------|-----------------------------|
| Gne_10_R1_primer+ | AATCGGCAGCGTAAGTTCTCGT      |
| Gne_11_F1_primer+ | TAAACGAGGTGCTCTACCGACT      |
| Gne_11_R1_primer+ | CTACTATGCTCCAACCCGAAAT      |
| Gne_11_F2_primer+ | CAGTGGTTAGAGTATCGCTTTC      |
| Gne_11_R2_primer+ | CAATAGTGGCAAGATCGGTATAT     |
| Gne_11_F3_primer+ | GACTGAGCTATAGCCCTGCGAT      |
| Gne_11_R3_primer+ | TGACGCAGAAAAGGGTGCTGAT      |
| Gne_12_F1_primer+ | CAAGTTTGAGTTTGCTCCAGTG      |
| Gne_12_R1_primer+ | GATTTGCCGCTATTCCTTTCAC      |
| Gne_12_F2_primer+ | TCCGGACCATGAGGTCAAGGGT      |
| Gne_12_R2_primer+ | TGATTGGTTCTATCCAGAGCCT      |
| Gne_13_F1_primer+ | CTTATACGGCAAGGGATGAATG      |
| Gne_13_R1_primer+ | ACGATAATGGTGAACCCCTCTAC     |
| Gne_13_F2_primer+ | GTCACCCTTATACGGCAAGGGAT     |
| Gne_13_R2_primer+ | TATTATGCAAGAGTGGTCCCGCT     |
| Gne_14_F1_primer+ | AATGGTTATCGGTTCAAGGACG      |
| Gne_14_R1_primer+ | CTCAATCCCAGGAAACAGTAAAG     |
| Gne_14_R2_primer+ | TAGGTTCTGACGCAAGGTTAGAGT    |
| Gne_15_R1_primer+ | GCTTTCAGTAGTTATCCGCTCC      |
| Gne_16_F1_primer+ | TCATCTTGAGGTGGGCTTCTTA      |
| Gne_16_R1_primer+ | CACCTGGACAGAAAAGACCCTATG    |
| Gne_16_F2_primer+ | CTAGAGTGGTATCTCACTGATGGCT   |
| Gne_16_R2_primer+ | TACGGCGCTGAAGTAACCCACGTT    |
| Gne_25_F1_primer+ | GTTCTACGGGAGATGCTTACTGT     |
| Gne_25_R1_primer+ | TTACGGTCAACAAAGGCGAAGC      |
| Gne_25_R2_primer+ | TGCTCTACTTCGATGGCTAGAAGACT  |
| Gne_26_F1_primer+ | TACTCCAAGAAGCTGTAGATGCGCT   |
| Gne_26_R1_primer+ | TGGGAAGTTCTTGGTCTACTGAGGT   |
| Gne_27_F1_primer+ | GGCATATGCCAGCTCTAACTGAGAT   |
| Gne_27_R1_primer+ | GCTAAAGGATTTGCCGCTATTCCT    |
| Gne_27_F2_primer+ | TCCAGTGGATACGGTGTAATTCAGT   |
| Gne_27_R2_primer+ | CGAGAATATCGCGTTTTCCATG      |
| Gne_28_F1_primer+ | CTGGACCAGTATAATCAGCCT       |
| Gne_28_R1_primer+ | AAGGTGATAGGAACCAACCCT       |
| Gne_28_F2_primer+ | GAAGGAGCGTTCTCCTGTATT       |
| Gne_28_R2_primer+ | TGATGCCGTAGGTTCAAATCCT      |
| Gne_28_F3_primer+ | TAGAATAGCCATGGAAACACGGAAT   |
| Gne_28_R3_primer+ | GGCTAAAGATAACCTATGAGAGGT    |
| Gne_28_F4_primer+ | CACGGAATCCAATATATAAGGT      |
| Gne_28_R4_primer+ | TATAATTTGACGGAGAGGCGCGGGCT  |
| Gne_29_F1_primer+ | TTCATCGGATTCCAGACGTGT       |
| Gne_29_F2_primer+ | GCTCCAAACATATATGCCATGGT     |
| Gne_29_R1_primer+ | ATCGATAGGTTCTGCCCAAT        |

| Primer name       | Primer Sequences (5' to 3')  |
|-------------------|------------------------------|
| Gne_30_F1_primer+ | TTGGCAACCAGAGGCTAGTAAGTT     |
| Gne_30_R1_primer+ | TACCACTCTAGAAAGTGCCAGAACTCT  |
| Gne_31_F1_primer+ | GGACCAGTGCTAGTAGTTCTT        |
| Gne_31_F2_primer+ | TCCGGGTACTCACAGCTATTAGAAGT   |
| Gne_31_R1_primer+ | TGCTATATAGCTGCGACCGAGTTGT    |
| Gne_32_F1_primer+ | TAGGTATCCGAGGACTAATGTCAGAT   |
| Gne_32_R1_primer+ | TCTCCAATAGACTGGCCTGCAAT      |
| Gne_33_F1_primer+ | TGATCAGAACGAGTAGCGTCAGATGT   |
| Gne_33_R1_primer+ | GCTGTATGCATTATATGCACGGCAAT   |
| Gne_33_R2_primer+ | TGGTCCCATTACGCTGATTAATCG     |
| Gne_34_F1_primer+ | TCGATCTGTGACAATGTCCGACT      |
| Gne_34_R1_primer+ | TAGGATCGATCAGTTTCCTCAGGACCT  |
| Gne_35_F1_primer+ | TCTCTTCGACCGAGGAGATATCTCT    |
| Gne_35_R1_primer+ | CTCGAAGATTGACGAAGGAACAATAGC  |
| Gne_36_F1_primer+ | GTGGATCTGAAGCAGGTATTCCT      |
| Gne_36_R1_primer+ | TTGAGCCTGAAGCTGCTATT         |
| Gne_38_F1_primer+ | TAGTTGCTCTAGGTCAACCTCTTCGT   |
| Gne_38_R1_primer+ | TACCGATGACTTTCGTGATGTAAGCT   |
| Gne_39_F1_primer+ | TGCCAAGATATTGAATCTGTAGCAT    |
| Gne_39_R1_primer+ | GTCAAACAAGTGGTCTGACTT        |
| Gne_39_F2_primer+ | TAACACTTTAGCCAGTGCTTCCAGT    |
| Gne_39_R2_primer+ | GTCCAAACTTCAGGATTATACGT      |
| Gne_39_F3_primer+ | GATGATAAGTCATAACGATCAT       |
| Gne_40_F1_primer+ | GCCAAGCCTATAAGGGTTGACT       |
| Gne_40_R1_primer+ | CCATATCATTTGACTCTGGAT        |
| Gne_40_F2_primer+ | TCAAGATTAAAGGAAAGATGGCCGAGC  |
| Gne_41_F1_primer+ | CAAGGTGTATTCTTTCCACCTGCT     |
| Gne_41_R1_primer+ | TTAAAGGTACCAAGCCTGCCTT       |
| Gne_42_F1_primer+ | GTCACCCTTATACGGCAAGGGAT      |
| Gne_42_R1_primer+ | TCTACATCTGACGCTACTCGTT       |
| Gne_42_R2_primer+ | CTGGAAAGATAAAGAAACGGAAGAAGAT |
| T1F1_Ara_pri+     | GCGCTATTCGGATCTACACTTCTAGT   |
| T1R1_Ara_pri+     | TGACATCATACAGGCGTGTGTT       |
| T1R2_Ara_pri+     | TACGATGGACGTGGTACAATTCGT     |
| T1F1_Cep_pri+     | GTAGACCGTGAGGACCAAGATGAAT    |
| T1R1_Cep_pri+     | CGGTACAAGTGGCGTAGACAGTT      |
| T2F1_Cep_pri+     | TATGGACCGAACTGTCTCACGACGTT   |
| T2R1_Cep_pri+     | TGTCTGTGAAGATGCGGACTACCT     |
| T3F1_Cep_pri+     | TACGCCATGCTACTGTGCCTTGTATGAT |
| T3R1_Cep_pri+     | GCTGCACAATGCCGATCTTCAT       |
| T1F1_Cun_pri+     | TCCGGCTTAACACCGATAGTCTGTT    |
| T1R1_Cun_pri+     | CGATGGATACTAAGTGCTGTGCGTAT   |
| T2F1_Cun_pri+     | CCATCTTGAGCAGTGCTATGCTTAGT   |

| Primer name        | Primer Sequences (5' to 3')  |
|--------------------|------------------------------|
| T2R1_Cun_pri+      | TGCAATCACAGGTTCCATCGT        |
| T2F2_Cun_pri+      | GAATCGGCTATGCAAGGTAGAGT      |
| T1F1_Cyc_pri+      | TATGGACCGAACTGTCTCACGACGTT   |
| T1R1_Cyc_pri+      | TGAAGATGCGGACTACCTGCACCT     |
| T2F1_Cyc_pri+      | TCCAGTACGGCTACCTTGTTACGACT   |
| T2R1_Cyc_pri+      | GAGGAATAAGCATCGGCTAACTCTGT   |
| T3F1_Cyc_pri+      | TACTTCGTATTGCCGAGATCCAAGGAT  |
| T3R1_Cyc_pri+      | TCGCCATCCTATCCAATGGATGAT     |
| T4F1_Cyc_pri+      | TCCGAGGAATAAGCATCGGCTAACT    |
| T4R1_Cyc_pri+      | TCCAGTACGGCTACCTTGTTACGACT   |
| T5F1_Cyc_pri+      | TGAAGATGCGGACTACCTGCACCT     |
| T5R1_Cyc_pri+      | TATGGACCGAACTGTCTCACGACGTT   |
| T1F1_Eph_pri+      | GAACTCTAACCTTGCGTCAGAACCT    |
| T1R1_Eph_pri+      | CGTGACCTTATCGGTTACTCGAT      |
| T2F1_Eph_pri+      | TTCAGTAGTTATCCGCTCCGCACTT    |
| T2R2_Eph_pri+      | TGGAGCCATCAGTGAGATACCACTCT   |
| T1F1_Gin_pri+      | TGTCTGTGAAGATGCGGACTACCT     |
| T1R1_Gin_pri+      | TCCACTTGACACCTATCGTGATGAT    |
| T2F1_Gin_pri+      | TCTCGCCGTGACCTTATCTTGGATT    |
| T2R2_Gin_pri+      | TATCGGTTCAAGGACGCAAGGTGACCT  |
| T3F1_Gin_pri+      | GGGGAATGTGTGAAGAAGGGAC       |
| T3R1_Gin_pri+      | CTACTCGTTGACCCCCTCGTTT       |
| T1F1_Pin_arm_pri+  | TCAAGTCATGCGTTGGTACGATACT    |
| T1R1_Pin_arm_pri+  | CGTCAGTAGCATATTTCTATGCAGGT   |
| T2F1_Pin_arm_pri+  | TGATCTGTCCAGTGCTTATGTATCC    |
| T2R1_Pin_arm_pri+  | TTAGCATCTGTCAATTCTGGCACAGAT  |
| T3F1_Pin_arm_pri+  | TACAATTAATCCGGCATGAGCCACGT   |
| T3R1_Pin_arm_pri+  | TCATGTTATTTGTGCCAGTGACCGGT   |
| T4F1_Pin_arm_pri+  | TGGTTCTAATGATGATCCTGCACGT    |
| T4R1_Pin_arm_pri+  | GCATGGCCTAATCAATAGTTCAAGT    |
| T5F1_Pin_arm_pri+  | GGAAGTAATTCGTTGAGATCATGCACT  |
| T5R1_Pin_arm_pri+  | TGCGGGAGAGGCTGATCTTAATAATT   |
| T5R2_Pin_arm_pri+  | TCTGTCCATTAGATCTCCAGATAGAGT  |
| T6F1_Pin_arm_pri+  | TCCTATCTTCAACAAGTGGTCCAGCAT  |
| T6R1_Pin_arm_pri+  | CGAGAGTTTCAATCAGTTCCTGCCAAT  |
| T7F1_Pin_arm_pri+  | TAGATTGTCCACGCTAACGATCCATCCT |
| T7R1_Pin_arm_pri+  | TCACGTGGCTCATGCCGGATTAATT    |
| T8F1_Pin_arm_pri+  | GGACTGATCCGATCCATAATGAT      |
| T8R1_Pin_arm_pri+  | GGATCAGATGGTATAGTCTATTCAATC  |
| T8R2_Pin_arm_pri+  | TCAATGCGGTGAATTATGTCTCTCC    |
| T9F1_Pin_arm_pri+  | TCATGATGATGCCATGTGAATTGCT    |
| T9R1_Pin_arm_pri+  | TACTTCGCCGTGACATGAGTGT       |
| T10F1_Pin_arm_pri+ | TGTGCGAACCAATGGGAACGATCAT    |



| Primer name        | Primer Sequences (5' to 3')     |
|--------------------|---------------------------------|
| T10R1_Pin_arm_pri+ | TCGTGGTCGTTTCATATGGACAAGCACT    |
| T11F1_Pin_arm_pri+ | TGAGGCTATTCCTGTAATAGGATCTCCT    |
| T11R1_Pin_arm_pri+ | CTGGCGATGATATATTACCGTCGTTACT    |
| T12F1_Pin_arm_pri+ | CGACGAAGGATTGAAGCATCACTGT       |
| T12R1_Pin_arm_pri+ | CTGAGAGAGGCTTGTACAGTT           |
| T1F1_Pod_pri+      | TATCACCGATGGTCTGTTTCAGAGTT      |
| T1R1_Pod_pri+      | GGATGCAAGCGTTATCCGGAATTAT       |
| T1F1_Pic_smi_pri+  | TCTATGGCTACACAGACCATTGAT        |
| T1R1_Pic_smi_pri+  | TATCCAACGAGGTAGGACCATCTT        |
| T2F1_Pic_smi_pri+  | TGCAACAGGTACGCCAATCACTAGT       |
| T2R1_Pic_smi_pri+  | TACAGCCTTGGCAGGAACGACGTT        |
| T3F1_Pic_smi_pri+  | GTCAAGGGGAATGTGTAAAGAAG         |
| T3R1_Pic_smi_pri+  | TCCATTTCTCCTATTCGTTGCCC         |
| T1F1_Tai_pri+      | TGATACAGATTGTGATCCAGATCTCGT     |
| T1R1_Tai_pri+      | CAGGAAGTTATAAGTACCTGTGCATGAACT  |
| T1R2_Tai_pri+      | TCCTAGGAACATTACAGGTATAGGTACCACT |
| T2F1_Tai_pri+      | TATGGACCGAACTGTCTCACGACGTT      |
| T1F1_Tax_pri+      | TCTAACCTTGCGTCAGAACCTACTGT      |
| T1R1_Tax_pri+      | TTATGGAGAGCACTCATCTTGAGGT       |
| T2F1_Tax_pri+      | GGAAACATTATCTATCTCGGCACT        |
| T2R1_Tax_pri+      | ACCCCTTGATTTAATGCCAGAT          |
| T1F1_Wel_pri+      | TGCCAGAACTCTAACCTTGCGT          |
| T1R1_Wel_pri+      | TATGGACCGAACTGTCTCACGACGTT      |
| T2F1_Wel_pri+      | TATGGACCGAACTGTCTCACGACGTT      |
| T2R1_Wel_pri+      | CATGTCTGTGAAGATGCGGACTACCT      |
| T3F1_Wel_pri+      | TGCACACTTAGATGCTACTACCGTACT     |
| T3R1_Wel_pri+      | TTCCTGAGCCTCTTGAGGATCAAT        |
| T1F1_Zam_pri+      | TAGAGCCAGTAGACGAATACGACAT       |
| T2F1_Zam_pri+      | TAGACATGTCTGTGAAGATGCGGACT      |
| T2R1_Zam_pri+      | TGCACTTCCACTTGACACCTATCGTGAT    |
| T3F1_Zam_pri+      | TATGGACCGAACTGTCTCACGACGT       |
| T3R1_Zam_pri+      | TCTCCGCGAAGTCGTAAGACCATGTAT     |
| T4F1_Zam_pri+      | TGCCAGAGTACGATTAACCTCTGGAT      |
| T4R1_Zam_pri+      | GATCCACCTACACGTCTTGCTT          |
| T4F2_Zam_pri+      | TCGTCAACAAGGGCGTTCTAGTGCGT      |
| T4R2_Zam_pri+      | TAATGACCAACGAATGGCAAGTGCTT      |

- used for gap filling

\* used directly for sequencing

# used for verification after filling gaps

+ used for RT-PCR
