# Supplementary material for: A Comprehensive Evolutionary Study of Chloroplast RNA Editing in Gymnosperms: A Novel Type of G-to-A RNA Editing Is Common in Gymnosperms
Source: Int J Mol Sci. 2022 Sep 16;23(18):10844. doi: 10.3390/ijms231810844 (PMC9505161; doi:10.3390/ijms231810844)
Supplement: Supplementary file 1 [file ijms-23-10844-s001.zip]

Archive with 11 entries (11 files):
- fig S1.pdf
- fig S2.pdf
- fig S3.pdf
- fig S4.pdf
- fig S5.pdf
- Table S1.xlsx
- Table S3.xlsx
- Table S4.pdf
- Table S5.pdf
- Table S6.pdf
- Table S7.xlsx
