# Supplementary material for: A Comprehensive Evolutionary Study of Chloroplast RNA Editing in Gymnosperms: A Novel Type of G-to-A RNA Editing Is Common in Gymnosperms
Source: Int J Mol Sci. 2022 Sep 16;23(18):10844. doi: 10.3390/ijms231810844 (PMC9505161; doi:10.3390/ijms231810844)
Supplement: Supplementary file 1 [file ijms-23-10844-s001.zip › Table S1.xlsx]

## Sheet: Sheet1
Table S1. Summary of land plants with detailed study on chloroplast RNA editing sites.
Taxon	Species	Region of editing sites	Number of editing sites	Approach	Reference
Angiosperms	Ligusticum capillaceum	protein-coding genes (coding region)	57	predicted by PREP software	Ren T, Li Z X, Xie D F, et al. Plastomes of eight Ligusticum species: characterization, genome evolution, and phylogenetic relationships. BMC plant biology, 2020, 20(1): 1-14.
	Ligusticum delavayi	protein-coding genes (coding region)	55	predicted by PREP software	Ren T, Li Z X, Xie D F, et al. Plastomes of eight Ligusticum species: characterization, genome evolution, and phylogenetic relationships. BMC plant biology, 2020, 20(1): 1-14.
	Ligusticum hispidum	protein-coding genes (coding region)	58	predicted by PREP software	Ren T, Li Z X, Xie D F, et al. Plastomes of eight Ligusticum species: characterization, genome evolution, and phylogenetic relationships. BMC plant biology, 2020, 20(1): 1-14.
	Ligusticum involucratum	protein-coding genes (coding region)	59	predicted by PREP software	Ren T, Li Z X, Xie D F, et al. Plastomes of eight Ligusticum species: characterization, genome evolution, and phylogenetic relationships. BMC plant biology, 2020, 20(1): 1-14.
	Ligusticum likiangense	protein-coding genes (coding region)	67	predicted by PREP software	Ren T, Li Z X, Xie D F, et al. Plastomes of eight Ligusticum species: characterization, genome evolution, and phylogenetic relationships. BMC plant biology, 2020, 20(1): 1-14.
	Ligusticum pteridophyllum	protein-coding genes (coding region)	58	predicted by PREP software	Ren T, Li Z X, Xie D F, et al. Plastomes of eight Ligusticum species: characterization, genome evolution, and phylogenetic relationships. BMC plant biology, 2020, 20(1): 1-14.
	Ligusticum scapiforme	protein-coding genes (coding region)	57	predicted by PREP software	Ren T, Li Z X, Xie D F, et al. Plastomes of eight Ligusticum species: characterization, genome evolution, and phylogenetic relationships. BMC plant biology, 2020, 20(1): 1-14.
	Ligusticum thomsonii	protein-coding genes (coding region)	58	predicted by PREP software	Ren T, Li Z X, Xie D F, et al. Plastomes of eight Ligusticum species: characterization, genome evolution, and phylogenetic relationships. BMC plant biology, 2020, 20(1): 1-14.
	Forsythia suspensa	protein-coding genes (coding region)	52	predicted by PREP software and CURE software	Wang W, Yu H, Wang J, et al. The complete chloroplast genome sequences of the medicinal plant Forsythia suspensa (Oleaceae). International Journal of Molecular Sciences, 2017, 18(11): 2288.
	Arabidopsis thaliana	protein-coding genes (coding region+intron) + 3'UTR	43	Experimentally Identified	Ruwe H, Castandet B, Schmitz-Linneweber C, et al. Arabidopsis chloroplast quantitative editotype. FEBS letters, 2013, 587(9): 1429-1433.
	Atropa belladonna	protein-coding genes (coding region)	31	Experimentally Identified	Schmitz-Linneweber C, Regel R, Du T G, et al. The plastid chromosome of Atropa belladonna and its comparison with that of Nicotiana tabacum: the role of RNA editing in generating divergence in the process of plant speciation. Molecular biology and evolution, 2002, 19(9): 1602-1612.
	Hevea brasiliensis	plastome	51	Experimentally Identified	Tangphatsornruang S, Uthaipaisanwong P, Sangsrakru D, et al. Characterization of the complete chloroplast genome of Hevea brasiliensis reveals genome rearrangement, RNA editing sites and phylogenetic relationships. Gene, 2011, 475(2): 104-112
	Nicotiana tabacum	protein-coding genes (coding region)	31	Experimentally Identified	Hirose T, Kusumegi T, Tsudzuki T, et al. RNA editing sites in tobacco chloroplast transcripts: editing as a possible regulator of chloroplast RNA polymerase activity. Molecular and General Genetics MGG, 1999, 262(3): 462-467.
	Oryza sativa	protein-coding genes (coding region)	21	Experimentally Identified	Corneille S, Lutz K, Maliga P. Conservation of RNA editing between rice and maize plastids: are most editing events dispensable?. Molecular and General Genetics MGG, 2000, 264(4): 419-424.
	Pisum sativum	protein-coding genes (coding region)	27	Experimentally Identified	Inada M, Sasaki T, Yukawa M, et al. A systematic search for RNA editing sites in pea chloroplasts: an editing event causes diversification from the evolutionarily conserved amino acid sequence. Plant and cell physiology, 2004, 45(11): 1615-1622.
	Zea mays	protein-coding genes (coding region)	27	Experimentally Identified	Tsudzuki T, Wakasugi T, Sugiura M. Comparative analysis of RNA editing sites in higher plant chloroplasts. Journal of molecular evolution, 2001, 53(4): 327-332.
	Aegilops tauschii	plastome	60	Experimentally Identified	Wang M, Liu H, Ge L, et al. Identification and analysis of RNA editing sites in the chloroplast transcripts of Aegilops tauschii L. Genes, 2017, 8(1): 13.
	Amborella trichopoda	plastome	184	Experimentally Identified	Ishibashi K, Small I, Shikanai T. Evolutionary model of plastidial RNA editing in angiosperms presumed from genome-wide analysis of Amborella Trichopoda. Plant and Cell Physiology, 2019, 60(10): 2141-2151.
	Vitis vinifera	plastome	115	Experimentally Identified	Ishibashi K, Small I, Shikanai T. Evolutionary model of plastidial RNA editing in angiosperms presumed from genome-wide analysis of Amborella Trichopoda. Plant and Cell Physiology, 2019, 60(10): 2141-2151.
	Solanum lycopersicum	protein-coding genes (coding region)	36	Experimentally Identified	Kahlau S, Aspinall S, Gray J C, et al. Sequence of the tomato chloroplast DNA and evolutionary comparison of solanaceous plastid genomes. Journal of molecular evolution, 2006, 63(2): 194-207.
	Cocos nucifera	protein-coding genes (coding region)	70	Experimentally Identified	Huang Y Y, Matzke A J M, Matzke M. Complete sequence and comparative analysis of the chloroplast genome of coconut palm (Cocos nucifera). PLoS One, 2013, 8(8): e74736.
	Cucumis sativus	protein-coding genes (coding region)	29	Experimentally Identified	Guzowska-Nowowiejska M, Fiedorowicz E, Pląder W. Cucumber, melon, pumpkin, and squash: Are rules of editing in flowering plants chloroplast genes so well known indeed?. Gene, 2009, 434(1-2): 1-8.
	Cucumis melo	protein-coding genes (coding region)	23	Experimentally Identified	Guzowska-Nowowiejska M, Fiedorowicz E, Pląder W. Cucumber, melon, pumpkin, and squash: Are rules of editing in flowering plants chloroplast genes so well known indeed?. Gene, 2009, 434(1-2): 1-8.
	Cucurbita maxima	protein-coding genes (coding region)	28	Experimentally Identified	Guzowska-Nowowiejska M, Fiedorowicz E, Pląder W. Cucumber, melon, pumpkin, and squash: Are rules of editing in flowering plants chloroplast genes so well known indeed?. Gene, 2009, 434(1-2): 1-8.
	Cucurbita pepo	protein-coding genes (coding region)	26	Experimentally Identified	Guzowska-Nowowiejska M, Fiedorowicz E, Pląder W. Cucumber, melon, pumpkin, and squash: Are rules of editing in flowering plants chloroplast genes so well known indeed?. Gene, 2009, 434(1-2): 1-8.
	Gossypium hirsutum	protein-coding genes (coding region)	54	Experimentally Identified	Jiang Y, Fan S L, Song M Z, et al. Identification of RNA editing sites in cotton (Gossypium hirsutum) chloroplasts and editing events that affect secondary and three-dimensional protein structures. Genet Mol Res, 2012, 11(2): 987-1001.
	Phalaenopsis aphrodite	protein-coding genes (coding region+intron)	44	Experimentally Identified	Zeng W H, Liao S C, Chang C C. Identification of RNA editing sites in chloroplast transcripts of Phalaenopsis aphrodite and comparative analysis with those of other seed plants. Plant and cell physiology, 2007, 48(2): 362-368.
	Spirodela polyrhiza	plastome	66	Experimentally Identified	Wang W, Zhang W, Wu Y, et al. RNA editing in chloroplasts of Spirodela polyrhiza, an aquatic monocotelydonous species. PLoS One, 2015, 10(10): e0140285.
	Vigna radiata	plastome	41	Experimentally Identified	Lin C P, Ko C Y, Kuo C I, et al. Transcriptional slippage and RNA editing increase the diversity of transcripts in chloroplasts: insight from deep sequencing of Vigna radiata genome and transcriptome. PloS one, 2015, 10(6): e0129396.
	Betula platyphylla	plastome	80	Experimentally Identified	Wang S, Yang C, Zhao X, et al. Complete chloroplast genome sequence of Betula platyphylla: gene organization, RNA editing, and comparative and phylogenetic analyses. BMC genomics, 2018, 19(1): 1-15.
	Vigna mungo	protein-coding genes (coding region)	34	Experimentally Identified	Nawae W, Yundaeng C, Naktang C, et al. The Genome and Transcriptome Analysis of the Vigna mungo Chloroplast. Plants, 2020, 9(9): 1247.
	Spinacia oleracea	protein-coding genes (coding region)	22	predicted by homology with several studied species	Tsudzuki T, Wakasugi T, Sugiura M. Comparative analysis of RNA editing sites in higher plant chloroplasts. Journal of Molecular Evolution, 2001, 53(4-5): 327-332.
	Oenothera elata	protein-coding genes (coding region)	23	predicted by homology with several studied species	Tsudzuki T, Wakasugi T, Sugiura M. Comparative analysis of RNA editing sites in higher plant chloroplasts. Journal of Molecular Evolution, 2001, 53(4-5): 327-332.
	Triticum aestivum cv. Chinese spring	protein-coding genes (coding region)	28	predicted by homology with several studied species	Tsudzuki T, Wakasugi T, Sugiura M. Comparative analysis of RNA editing sites in higher plant chloroplasts. Journal of Molecular Evolution, 2001, 53(4-5): 327-332.
	Nicotiana sylvestris	protein-coding genes (coding region)	33	Experimentally Identified	Sasaki T, Yukawa Y, Miyamoto T, et al. Identification of RNA editing sites in chloroplast transcripts from the maternal and paternal progenitors of tobacco (Nicotiana tabacum): comparative analysis shows the involvement of distinct trans-factors for ndhB editing. Molecular biology and evolution, 2003, 20(7): 1028-1035.
	Nicotiana tomentosiformis	protein-coding genes (coding region)	32	Experimentally Identified	Sasaki T, Yukawa Y, Miyamoto T, et al. Identification of RNA editing sites in chloroplast transcripts from the maternal and paternal progenitors of tobacco (Nicotiana tabacum): comparative analysis shows the involvement of distinct trans-factors for ndhB editing. Molecular biology and evolution, 2003, 20(7): 1028-1035.
	Ipomoea batata	protein-coding genes (coding region+intron)	43	Experimentally Identified	Yan L, Lai X, Li X, et al. Analyses of the complete genome and gene expression of chloroplast of sweet potato [Ipomoea batata]. PLoS One, 2015, 10(4): e0124083.
	Elaeis guineensis	protein-coding genes (coding region+intron)	32	Experimentally Identified	Uthaipaisanwong P, Chanprasert J, Shearman J R, et al. Characterization of the chloroplast genome sequence of oil palm (Elaeis guineensis Jacq.). Gene, 2012, 500(2): 172-180.
	Deschampsia antarctica	protein-coding genes (coding region)	30	Experimentally Identified	Lee J, Kang Y, Shin S C, et al. Combined analysis of the chloroplast genome and transcriptome of the Antarctic vascular plant Deschampsia antarctica Desv. PLoS One, 2014, 9(3): e92501.
	Dendrobium officinale	protein-coding genes (coding region)	51	predicted by PREP software	Luo J, Hou B W, Niu Z T, et al. Comparative chloroplast genomes of photosynthetic orchids: insights into evolution of the Orchidaceae and development of molecular markers for phylogenetic applications. PloS one, 2014, 9(6): e99016.
	Cypripedium macranthos	protein-coding genes (coding region)	51	predicted by PREP software	Luo J, Hou B W, Niu Z T, et al. Comparative chloroplast genomes of photosynthetic orchids: insights into evolution of the Orchidaceae and development of molecular markers for phylogenetic applications. PloS one, 2014, 9(6): e99016.
	Phalaenopsis equestris	protein-coding genes (coding region+intron)	43	predicted by CURE software	Jheng C F, Chen T C, Lin J Y, et al. The comparative chloroplast genomic analysis of photosynthetic orchids and developing DNA markers to distinguish Phalaenopsis orchids. Plant science, 2012, 190: 62-73.
	Oncidium spp.	protein-coding genes (coding region+intron)	40	predicted by CURE software	Jheng C F, Chen T C, Lin J Y, et al. The comparative chloroplast genomic analysis of photosynthetic orchids and developing DNA markers to distinguish Phalaenopsis orchids. Plant science, 2012, 190: 62-73.
	Tagetes erecta	plastome	20	Experimentally Identified	Jiang M, Xu Y, Wang L, et al. High level of intraspecific divergence and low frequency of RNA editing in the chloroplast genome sequence of Tagetes erecta. Mitochondrial DNA Part B, 2020, 5(3): 2948-2953.
	Liriodendron tulipifera	protein-coding genes (coding region)	89	Experimentally Identified	Jiang M, Xu Y, Wang L, et al. High level of intraspecific divergence and low frequency of RNA editing in the chloroplast genome sequence of Tagetes erecta. Mitochondrial DNA Part B, 2020, 5(3): 2948-2953.
	Nymphaea ‘Joey Tomocik’	plastome	98	Experimentally Identified	He Z S, Zhu A, Yang J B, et al. Organelle Genomes and Transcriptomes of Nymphaea Reveal the Interplay between Intron Splicing and RNA Editing. International journal of molecular sciences, 2021, 22(18): 9842.
	Pongamia pinnata	protein-coding genes (coding region)	121	Experimentally Identified	Kazakoff S H, Imelfort M, Edwards D, et al. Capturing the biofuel wellhead and powerhouse: the chloroplast and mitochondrial genomes of the leguminous feedstock tree Pongamia pinnata. PLoS One, 2012, 7(12): e51687.
	Francoa sonchifolia	protein-coding genes (coding region)	54	predicted by PREP software	Weng M L, Blazier J C, Govindu M, et al. Reconstruction of the ancestral plastid genome in Geraniaceae reveals a correlation between genome rearrangements, repeats, and nucleotide substitution rates. Molecular biology and evolution, 2014, 31(3): 645-659.
	Melianthus villosus	protein-coding genes (coding region)	51	predicted by PREP software	Weng M L, Blazier J C, Govindu M, et al. Reconstruction of the ancestral plastid genome in Geraniaceae reveals a correlation between genome rearrangements, repeats, and nucleotide substitution rates. Molecular biology and evolution, 2014, 31(3): 645-659.
	Viviania marifolia	protein-coding genes (coding region)	68	predicted by PREP software	Weng M L, Blazier J C, Govindu M, et al. Reconstruction of the ancestral plastid genome in Geraniaceae reveals a correlation between genome rearrangements, repeats, and nucleotide substitution rates. Molecular biology and evolution, 2014, 31(3): 645-659.
	Pelargonium alternans	protein-coding genes (coding region)	64	predicted by PREP software	Weng M L, Blazier J C, Govindu M, et al. Reconstruction of the ancestral plastid genome in Geraniaceae reveals a correlation between genome rearrangements, repeats, and nucleotide substitution rates. Molecular biology and evolution, 2014, 31(3): 645-659.
	California macrophylla	protein-coding genes (coding region)	67	predicted by PREP software	Weng M L, Blazier J C, Govindu M, et al. Reconstruction of the ancestral plastid genome in Geraniaceae reveals a correlation between genome rearrangements, repeats, and nucleotide substitution rates. Molecular biology and evolution, 2014, 31(3): 645-659.
	Hypseocharis bilobata	protein-coding genes (coding region)	60	predicted by PREP software	Weng M L, Blazier J C, Govindu M, et al. Reconstruction of the ancestral plastid genome in Geraniaceae reveals a correlation between genome rearrangements, repeats, and nucleotide substitution rates. Molecular biology and evolution, 2014, 31(3): 645-659.
	Citrus sinensis	protein-coding genes (coding region)	48	predicted by PREP software	Weng M L, Blazier J C, Govindu M, et al. Reconstruction of the ancestral plastid genome in Geraniaceae reveals a correlation between genome rearrangements, repeats, and nucleotide substitution rates. Molecular biology and evolution, 2014, 31(3): 645-659.
	Pelargonium hortorum	protein-coding genes (coding region)	70	predicted by PREP software	Weng M L, Blazier J C, Govindu M, et al. Reconstruction of the ancestral plastid genome in Geraniaceae reveals a correlation between genome rearrangements, repeats, and nucleotide substitution rates. Molecular biology and evolution, 2014, 31(3): 645-659.
	Monsonia speciosa	protein-coding genes (coding region)	76	predicted by PREP software	Weng M L, Blazier J C, Govindu M, et al. Reconstruction of the ancestral plastid genome in Geraniaceae reveals a correlation between genome rearrangements, repeats, and nucleotide substitution rates. Molecular biology and evolution, 2014, 31(3): 645-659.
	Geranium palmatum	protein-coding genes (coding region)	61	predicted by PREP software	Weng M L, Blazier J C, Govindu M, et al. Reconstruction of the ancestral plastid genome in Geraniaceae reveals a correlation between genome rearrangements, repeats, and nucleotide substitution rates. Molecular biology and evolution, 2014, 31(3): 645-659.
	Erodium texanum	protein-coding genes (coding region)	70	predicted by PREP software	Weng M L, Blazier J C, Govindu M, et al. Reconstruction of the ancestral plastid genome in Geraniaceae reveals a correlation between genome rearrangements, repeats, and nucleotide substitution rates. Molecular biology and evolution, 2014, 31(3): 645-659.
	Erodium carvifolium	protein-coding genes (coding region)	64	predicted by PREP software	Weng M L, Blazier J C, Govindu M, et al. Reconstruction of the ancestral plastid genome in Geraniaceae reveals a correlation between genome rearrangements, repeats, and nucleotide substitution rates. Molecular biology and evolution, 2014, 31(3): 645-659.
	Linum usitatissimum	protein-coding genes (coding region)	53	predicted by PREP software	de Santana Lopes A, Pacheco T G, Dos Santos K G, et al. The Linum usitatissimum L. plastome reveals atypical structural evolution, new editing sites, and the phylogenetic position of Linaceae within Malpighiales. Plant cell reports, 2018, 37(2): 307-328.
	Silene vulgaris	protein-coding genes (coding region+intron)	26	Experimentally Identified	Sloan D B, Alverson A J, Wu M, et al. Recent acceleration of plastid sequence and structural evolution coincides with extreme mitochondrial divergence in the angiosperm genus Silene. Genome biology and evolution, 2012, 4(3): 294-306.
	Silene latifolia	protein-coding genes (coding region+intron)	25	Experimentally Identified	Sloan D B, Alverson A J, Wu M, et al. Recent acceleration of plastid sequence and structural evolution coincides with extreme mitochondrial divergence in the angiosperm genus Silene. Genome biology and evolution, 2012, 4(3): 294-306.
	Silene noctiflora	protein-coding genes (coding region+intron)	24	Experimentally Identified	Sloan D B, Alverson A J, Wu M, et al. Recent acceleration of plastid sequence and structural evolution coincides with extreme mitochondrial divergence in the angiosperm genus Silene. Genome biology and evolution, 2012, 4(3): 294-306.
	Silene conica	protein-coding genes (coding region+intron)	24	Experimentally Identified	Sloan D B, Alverson A J, Wu M, et al. Recent acceleration of plastid sequence and structural evolution coincides with extreme mitochondrial divergence in the angiosperm genus Silene. Genome biology and evolution, 2012, 4(3): 294-306.
	Panicum virgatum	protein-coding genes (coding region)	35	predicted by CURE software	Young H A, Lanzatella C L, Sarath G, et al. Chloroplast genome variation in upland and lowland switchgrass. PloS one, 2011, 6(8): e23980.
	Arabidopsis lyrata	plastome	38/39#	Experimentally Identified	Kawabe A, Furihata H Y, Tsujino Y, et al. Divergence of RNA editing among Arabidopsis species. Plant Science, 2019, 280: 241-247.
	Arabidopsis halleri	plastome	40	Experimentally Identified	Kawabe A, Furihata H Y, Tsujino Y, et al. Divergence of RNA editing among Arabidopsis species. Plant Science, 2019, 280: 241-247.
	Saccharum officinarum	protein-coding genes (coding region)	23	Experimentally Identified	Junior T C, Carraro D M, Benatti M R, et al. Structural features and transcript-editing analysis of sugarcane (Saccharum officinarum L.) chloroplast genome. Current genetics, 2004, 46(6): 366-373.
Gymnosperms	Pinus thunbergii	protein-coding genes (coding region)	26	Experimentally Identified	Wakasugi T, Hirose T, Horihata M, et al. Creation of a novel protein-protein-coding genes (coding region) at the RNA level in black pine chloroplasts: the pattern of RNA editing in the gymnosperm chloroplast is different from that in angiosperms. Proceedings of the National Academy of Sciences, 1996, 93(16): 8766-8770.
	Cycas taitungensis	protein-coding genes (coding region)	85	Experimentally Identified	Chen H, Deng L, Jiang Y, et al. RNA editing sites exist in protein-coding genes in the chloroplast genome of Cycas taitungensis. Journal of integrative plant biology, 2011, 53(12): 961-970.
	Ginkgo biloba	protein-coding genes (coding region)	255 (This study: 237 C-to-U RNA editing sites in CDS)	Experimentally Identified	He P, Huang S, Xiao G, et al. Abundant RNA editing sites of chloroplast protein-coding genes in Ginkgo biloba and an evolutionary pattern analysis. BMC plant biology, 2016, 16(1): 1-12.
	Welwitschia mirabilis	-	0* (This stuy: 2 C-to-U RNA editing sites in CDS)	Experimentally Identified	Fan W, Guo W, Funk L, et al. Complete loss of RNA editing from the plastid genome and most highly expressed mitochondrial genes of Welwitschia mirabilis. Sci China Life Sci, 2019, 62(4): 498-506.
	Podocarpus latifolius	protein-coding genes (coding region)	149	predicted by PREP software	Saina J K, Li Z Z, Gichira A W, et al. The complete plastome of real yellow wood (Podocarpus latifolius): gene organization and comparison with related species. Holzforschung, 2019, 73(6): 525-536.
	Podocarpus lambertii	protein-coding genes (coding region)	148	predicted by PREP software	Saina J K, Li Z Z, Gichira A W, et al. The complete plastome of real yellow wood (Podocarpus latifolius): gene organization and comparison with related species. Holzforschung, 2019, 73(6): 525-536.
	Podocarpus totara	protein-coding genes (coding region)	151	predicted by PREP software	Saina J K, Li Z Z, Gichira A W, et al. The complete plastome of real yellow wood (Podocarpus latifolius): gene organization and comparison with related species. Holzforschung, 2019, 73(6): 525-536.
	Nageia nagi	protein-coding genes (coding region)	145	predicted by PREP software	Saina J K, Li Z Z, Gichira A W, et al. The complete plastome of real yellow wood (Podocarpus latifolius): gene organization and comparison with related species. Holzforschung, 2019, 73(6): 525-536.
	Retrophyllum piresii	protein-coding genes (coding region)	148	predicted by PREP software	Saina J K, Li Z Z, Gichira A W, et al. The complete plastome of real yellow wood (Podocarpus latifolius): gene organization and comparison with related species. Holzforschung, 2019, 73(6): 525-536.
	Dacrycarpus imbricatus	protein-coding genes (coding region)	146	predicted by PREP software	Saina J K, Li Z Z, Gichira A W, et al. The complete plastome of real yellow wood (Podocarpus latifolius): gene organization and comparison with related species. Holzforschung, 2019, 73(6): 525-536.
	Keteleeria davidiana	protein-coding genes (coding region)	78	Experimentally Identified	Wu C S, Sudianto E, Chaw S M. Tight association of genome rearrangements with gene expression in conifer plastomes. BMC Plant Biology, 2021, 21(1): 1-8.
	Agathis dammara	protein-coding genes (coding region)	42	Experimentally Identified	Wu C S, Sudianto E, Chaw S M. Tight association of genome rearrangements with gene expression in conifer plastomes. BMC Plant Biology, 2021, 21(1): 1-8.
	Nageia nagi	protein-coding genes (coding region)	23	Experimentally Identified	Wu C S, Sudianto E, Chaw S M. Tight association of genome rearrangements with gene expression in conifer plastomes. BMC Plant Biology, 2021, 21(1): 1-8.
	Sciadopitys verticillata	protein-coding genes (coding region)	35 (This study: 32 C-to-U RNA editing sites in CDS)	Experimentally Identified	Wu C S, Sudianto E, Chaw S M. Tight association of genome rearrangements with gene expression in conifer plastomes. BMC Plant Biology, 2021, 21(1): 1-8.
	Cephalotaxus wilsoniana	protein-coding genes (coding region)	32	Experimentally Identified	Wu C S, Sudianto E, Chaw S M. Tight association of genome rearrangements with gene expression in conifer plastomes. BMC Plant Biology, 2021, 21(1): 1-8.
	Cunninghamia konishii	protein-coding genes (coding region)	21	Experimentally Identified	Wu C S, Sudianto E, Chaw S M. Tight association of genome rearrangements with gene expression in conifer plastomes. BMC Plant Biology, 2021, 21(1): 1-8.
	Dioon spinulosum	protein-coding genes (coding region)	148	Experimentally Identified	Wu C S, Chaw S M. Evolution of mitochondrial RNA editing in extant gymnosperms. The Plant Journal, 2022.
	Zamia furfuracea	protein-coding genes (coding region)	121 (This study: 189 C-to-U RNA editing sites in CDS)	Experimentally Identified	Wu C S, Chaw S M. Evolution of mitochondrial RNA editing in extant gymnosperms. The Plant Journal, 2022.
	Pseudotsuga wilsoniana	protein-coding genes (coding region)	83	Experimentally Identified	Wu C S, Chaw S M. Evolution of mitochondrial RNA editing in extant gymnosperms. The Plant Journal, 2022.
	Gnetum hainanense	protein-coding genes (coding region)	1	Experimentally Identified	Wu C S, Chaw S M. Evolution of mitochondrial RNA editing in extant gymnosperms. The Plant Journal, 2022.
Ferns	Adiantum capillus-veneris	plastome	350	Experimentally Identified	Wolf P G, Rowe C A, Hasebe M. High levels of RNA editing in a vascular plant chloroplast genome: analysis of transcripts from the fern Adiantum capillus-veneris. Gene, 2004, 339: 89-97.
	Ophioglossum californicum	plastome	300	Experimentally Identified	Guo W, Grewe F, Mower J P. Variable frequency of plastid RNA editing among ferns and repeated loss of uridine-to-cytidine editing from vascular plants. PLoS One, 2015, 10(1): e0117075.
	Psilotum nudum	plastome	27	Experimentally Identified	Guo W, Grewe F, Mower J P. Variable frequency of plastid RNA editing among ferns and repeated loss of uridine-to-cytidine editing from vascular plants. PLoS One, 2015, 10(1): e0117075.
	Adiantum shastense	plastome	509	Experimentally Identified	Fauskee B D, Sigel E M, Pryer K M, et al. Variation in frequency of plastid RNA editing within Adiantum implies rapid evolution in fern plastomes. American journal of botany, 2021.
	Adiantum aleuticum	plastome	505	Experimentally Identified	Fauskee B D, Sigel E M, Pryer K M, et al. Variation in frequency of plastid RNA editing within Adiantum implies rapid evolution in fern plastomes. American journal of botany, 2021.
	Actinostachys pennula	protein-coding genes (coding region)	543/178#	predicted by PREPACT software	Labiak P H, Karol K G. Plastome sequences of an ancient fern lineage reveal remarkable changes in gene content and architecture. American Journal of Botany, 2017, 104(7): 1008-1018.
	Schizaea elegans	protein-coding genes (coding region)	696/249#	predicted by PREPACT software	Labiak P H, Karol K G. Plastome sequences of an ancient fern lineage reveal remarkable changes in gene content and architecture. American Journal of Botany, 2017, 104(7): 1008-1018.
	Schizaea pectinata	protein-coding genes (coding region)	724/261#	predicted by PREPACT software	Labiak P H, Karol K G. Plastome sequences of an ancient fern lineage reveal remarkable changes in gene content and architecture. American Journal of Botany, 2017, 104(7): 1008-1018.
	Equisetum hyemale	-	0	predicted by PREPACT software	Knie N, Grewe F, Fischer S, et al. Reverse U-to-C editing exceeds C-to-U RNA editing in some ferns–a monilophyte-wide comparison of chloroplast and mitochondrial RNA editing suggests independent evolution of the two processes in both organelles. BMC evolutionary biology, 2016, 16(1): 1-12.
	Alsophila spinulosa	protein-coding genes (coding region)	no data	predicted by PREPACT software	Knie N, Grewe F, Fischer S, et al. Reverse U-to-C editing exceeds C-to-U RNA editing in some ferns–a monilophyte-wide comparison of chloroplast and mitochondrial RNA editing suggests independent evolution of the two processes in both organelles. BMC evolutionary biology, 2016, 16(1): 1-12.
	Diplopterygium glaucum	protein-coding genes (coding region)	no data	predicted by PREPACT software	Knie N, Grewe F, Fischer S, et al. Reverse U-to-C editing exceeds C-to-U RNA editing in some ferns–a monilophyte-wide comparison of chloroplast and mitochondrial RNA editing suggests independent evolution of the two processes in both organelles. BMC evolutionary biology, 2016, 16(1): 1-12.
	Osmundastrum cinnamomeum	protein-coding genes (coding region)	no data	predicted by PREPACT software	Knie N, Grewe F, Fischer S, et al. Reverse U-to-C editing exceeds C-to-U RNA editing in some ferns–a monilophyte-wide comparison of chloroplast and mitochondrial RNA editing suggests independent evolution of the two processes in both organelles. BMC evolutionary biology, 2016, 16(1): 1-12.
	Angiopteris evecta	protein-coding genes (coding region)	no data	predicted by PREPACT software	Knie N, Grewe F, Fischer S, et al. Reverse U-to-C editing exceeds C-to-U RNA editing in some ferns–a monilophyte-wide comparison of chloroplast and mitochondrial RNA editing suggests independent evolution of the two processes in both organelles. BMC evolutionary biology, 2016, 16(1): 1-12.
	Marsilea crenata	protein-coding genes (coding region)	no data	predicted by PREPACT software	Knie N, Grewe F, Fischer S, et al. Reverse U-to-C editing exceeds C-to-U RNA editing in some ferns–a monilophyte-wide comparison of chloroplast and mitochondrial RNA editing suggests independent evolution of the two processes in both organelles. BMC evolutionary biology, 2016, 16(1): 1-12.
	Lygodium japonicum	protein-coding genes (coding region)	no data	predicted by PREPACT software	Knie N, Grewe F, Fischer S, et al. Reverse U-to-C editing exceeds C-to-U RNA editing in some ferns–a monilophyte-wide comparison of chloroplast and mitochondrial RNA editing suggests independent evolution of the two processes in both organelles. BMC evolutionary biology, 2016, 16(1): 1-12.
	Dryopteris fragrans	protein-coding genes (coding region)	345	Experimentally Identified	Gao R, Wang W, Huang Q, et al. Complete chloroplast genome sequence of Dryopteris fragrans (L.) Schott and the repeat structures against the thermal environment. Scientific reports, 2018, 8(1): 1-11.
Hornworts	Anthoceros formosae	genes	942	Experimentally Identified	Kugita M, Yamamoto Y, Fujikawa T, et al. RNA editing in hornwort chloroplasts makes more than half the genes functional. Nucleic acids research, 2003, 31(9): 2417-2423.
Liverworts	Apopellia endiviifolia	protein-coding genes (coding region)	54	Experimentally Identified	Grosche C, Funk H T, Maier U G, et al. The chloroplast genome of Pellia endiviifolia: gene content, RNA-editing pattern, and the origin of chloroplast editing. Genome Biology and Evolution, 2012, 4(12): 1349-1357.
	Lepidozia sandvicensis	protein-coding genes (coding region)	156	Experimentally Identified	Dong S, Zhao C, Zhang S, et al. The amount of RNA editing sites in liverwort organellar genes is correlated with GC content and nuclear PPR protein diversity. Genome biology and evolution, 2019, 11(11): 3233-3239.
	Lepidozia trichodes	protein-coding genes (coding region)	195	Experimentally Identified	Dong S, Zhao C, Zhang S, et al. The amount of RNA editing sites in liverwort organellar genes is correlated with GC content and nuclear PPR protein diversity. Genome biology and evolution, 2019, 11(11): 3233-3239.
	Bazzania japonica	protein-coding genes (coding region)	202	Experimentally Identified	Dong S, Zhao C, Zhang S, et al. The amount of RNA editing sites in liverwort organellar genes is correlated with GC content and nuclear PPR protein diversity. Genome biology and evolution, 2019, 11(11): 3233-3239.
	Herbertus dicranus	protein-coding genes (coding region)	7	Experimentally Identified	Dong S, Zhao C, Zhang S, et al. The amount of RNA editing sites in liverwort organellar genes is correlated with GC content and nuclear PPR protein diversity. Genome biology and evolution, 2019, 11(11): 3233-3239.
	Herbertus ramosus	protein-coding genes (coding region)	4	Experimentally Identified	Dong S, Zhao C, Zhang S, et al. The amount of RNA editing sites in liverwort organellar genes is correlated with GC content and nuclear PPR protein diversity. Genome biology and evolution, 2019, 11(11): 3233-3239.
	Heteroscyphus zollingeri	protein-coding genes (coding region)	91	Experimentally Identified	Dong S, Zhao C, Zhang S, et al. The amount of RNA editing sites in liverwort organellar genes is correlated with GC content and nuclear PPR protein diversity. Genome biology and evolution, 2019, 11(11): 3233-3239.
	Plagiochila subtropica	protein-coding genes (coding region)	57	Experimentally Identified	Dong S, Zhao C, Zhang S, et al. The amount of RNA editing sites in liverwort organellar genes is correlated with GC content and nuclear PPR protein diversity. Genome biology and evolution, 2019, 11(11): 3233-3239.
	Trichocolea tomentella	protein-coding genes (coding region)	37	Experimentally Identified	Dong S, Zhao C, Zhang S, et al. The amount of RNA editing sites in liverwort organellar genes is correlated with GC content and nuclear PPR protein diversity. Genome biology and evolution, 2019, 11(11): 3233-3239.
	Scapania griffithii	protein-coding genes (coding region)	75	Experimentally Identified	Dong S, Zhao C, Zhang S, et al. The amount of RNA editing sites in liverwort organellar genes is correlated with GC content and nuclear PPR protein diversity. Genome biology and evolution, 2019, 11(11): 3233-3239.
	Scapania ornithopodioides	protein-coding genes (coding region)	86	Experimentally Identified	Dong S, Zhao C, Zhang S, et al. The amount of RNA editing sites in liverwort organellar genes is correlated with GC content and nuclear PPR protein diversity. Genome biology and evolution, 2019, 11(11): 3233-3239.
	Plicanthus hirtellus	protein-coding genes (coding region)	92	Experimentally Identified	Dong S, Zhao C, Zhang S, et al. The amount of RNA editing sites in liverwort organellar genes is correlated with GC content and nuclear PPR protein diversity. Genome biology and evolution, 2019, 11(11): 3233-3239.
	Odontoschisma grosseverrucosum	protein-coding genes (coding region)	236	Experimentally Identified	Dong S, Zhao C, Zhang S, et al. The amount of RNA editing sites in liverwort organellar genes is correlated with GC content and nuclear PPR protein diversity. Genome biology and evolution, 2019, 11(11): 3233-3239.
	Nowellia curvifolia	protein-coding genes (coding region)	16	Experimentally Identified	Dong S, Zhao C, Zhang S, et al. The amount of RNA editing sites in liverwort organellar genes is correlated with GC content and nuclear PPR protein diversity. Genome biology and evolution, 2019, 11(11): 3233-3239.
	Metacalypogeia alternifolia	protein-coding genes (coding region)	83	Experimentally Identified	Dong S, Zhao C, Zhang S, et al. The amount of RNA editing sites in liverwort organellar genes is correlated with GC content and nuclear PPR protein diversity. Genome biology and evolution, 2019, 11(11): 3233-3239.
	Mylia nuda	protein-coding genes (coding region)	52	Experimentally Identified	Dong S, Zhao C, Zhang S, et al. The amount of RNA editing sites in liverwort organellar genes is correlated with GC content and nuclear PPR protein diversity. Genome biology and evolution, 2019, 11(11): 3233-3239.
	Frullania orientalis	protein-coding genes (coding region)	2	Experimentally Identified	Dong S, Zhao C, Zhang S, et al. The amount of RNA editing sites in liverwort organellar genes is correlated with GC content and nuclear PPR protein diversity. Genome biology and evolution, 2019, 11(11): 3233-3239.
	Ptychanthus striatus	protein-coding genes (coding region)	17	Experimentally Identified	Dong S, Zhao C, Zhang S, et al. The amount of RNA editing sites in liverwort organellar genes is correlated with GC content and nuclear PPR protein diversity. Genome biology and evolution, 2019, 11(11): 3233-3239.
	Porella plumosa	protein-coding genes (coding region)	15	Experimentally Identified	Dong S, Zhao C, Zhang S, et al. The amount of RNA editing sites in liverwort organellar genes is correlated with GC content and nuclear PPR protein diversity. Genome biology and evolution, 2019, 11(11): 3233-3239.
	Radula japonica	protein-coding genes (coding region)	2	Experimentally Identified	Dong S, Zhao C, Zhang S, et al. The amount of RNA editing sites in liverwort organellar genes is correlated with GC content and nuclear PPR protein diversity. Genome biology and evolution, 2019, 11(11): 3233-3239.
	Ptilidium pulcherrimum	protein-coding genes (coding region)	16	Experimentally Identified	Dong S, Zhao C, Zhang S, et al. The amount of RNA editing sites in liverwort organellar genes is correlated with GC content and nuclear PPR protein diversity. Genome biology and evolution, 2019, 11(11): 3233-3239.
	Aneura pinguis	protein-coding genes (coding region)	190	Experimentally Identified	Dong S, Zhao C, Zhang S, et al. The amount of RNA editing sites in liverwort organellar genes is correlated with GC content and nuclear PPR protein diversity. Genome biology and evolution, 2019, 11(11): 3233-3239.
	Aneura sharpii	protein-coding genes (coding region)	175	Experimentally Identified	Dong S, Zhao C, Zhang S, et al. The amount of RNA editing sites in liverwort organellar genes is correlated with GC content and nuclear PPR protein diversity. Genome biology and evolution, 2019, 11(11): 3233-3239.
	Riccardia latifrons	protein-coding genes (coding region)	40	Experimentally Identified	Dong S, Zhao C, Zhang S, et al. The amount of RNA editing sites in liverwort organellar genes is correlated with GC content and nuclear PPR protein diversity. Genome biology and evolution, 2019, 11(11): 3233-3239.
	Metzgeria leptoneura	protein-coding genes (coding region)	51	Experimentally Identified	Dong S, Zhao C, Zhang S, et al. The amount of RNA editing sites in liverwort organellar genes is correlated with GC content and nuclear PPR protein diversity. Genome biology and evolution, 2019, 11(11): 3233-3239.
	Makinoa crispata	protein-coding genes (coding region)	81	Experimentally Identified	Dong S, Zhao C, Zhang S, et al. The amount of RNA editing sites in liverwort organellar genes is correlated with GC content and nuclear PPR protein diversity. Genome biology and evolution, 2019, 11(11): 3233-3239.
	Pleurozia purpurea	protein-coding genes (coding region)	21	Experimentally Identified	Dong S, Zhao C, Zhang S, et al. The amount of RNA editing sites in liverwort organellar genes is correlated with GC content and nuclear PPR protein diversity. Genome biology and evolution, 2019, 11(11): 3233-3239.
	Fossombronia cristula	protein-coding genes (coding region)	106	Experimentally Identified	Dong S, Zhao C, Zhang S, et al. The amount of RNA editing sites in liverwort organellar genes is correlated with GC content and nuclear PPR protein diversity. Genome biology and evolution, 2019, 11(11): 3233-3239.
	Pallavicinia lyellii	protein-coding genes (coding region)	59/64#	Experimentally Identified	Dong S, Zhao C, Zhang S, et al. The amount of RNA editing sites in liverwort organellar genes is correlated with GC content and nuclear PPR protein diversity. Genome biology and evolution, 2019, 11(11): 3233-3239.
	Pellia endiviifolia	protein-coding genes (coding region)	50	Experimentally Identified	Dong S, Zhao C, Zhang S, et al. The amount of RNA editing sites in liverwort organellar genes is correlated with GC content and nuclear PPR protein diversity. Genome biology and evolution, 2019, 11(11): 3233-3239.
	Monosolenium tenerum	-	0	Experimentally Identified	Dong S, Zhao C, Zhang S, et al. The amount of RNA editing sites in liverwort organellar genes is correlated with GC content and nuclear PPR protein diversity. Genome biology and evolution, 2019, 11(11): 3233-3239.
	Wiesnerella denudata	-	0	Experimentally Identified	Dong S, Zhao C, Zhang S, et al. The amount of RNA editing sites in liverwort organellar genes is correlated with GC content and nuclear PPR protein diversity. Genome biology and evolution, 2019, 11(11): 3233-3239.
	Riccia cavernosa	-	0	Experimentally Identified	Dong S, Zhao C, Zhang S, et al. The amount of RNA editing sites in liverwort organellar genes is correlated with GC content and nuclear PPR protein diversity. Genome biology and evolution, 2019, 11(11): 3233-3239.
	Asterella wallichiana	-	0	Experimentally Identified	Dong S, Zhao C, Zhang S, et al. The amount of RNA editing sites in liverwort organellar genes is correlated with GC content and nuclear PPR protein diversity. Genome biology and evolution, 2019, 11(11): 3233-3239.
	Dumortiera hirsuta	-	0	Experimentally Identified	Dong S, Zhao C, Zhang S, et al. The amount of RNA editing sites in liverwort organellar genes is correlated with GC content and nuclear PPR protein diversity. Genome biology and evolution, 2019, 11(11): 3233-3239.
	Conocephalum conicum	-	0	Experimentally Identified	Dong S, Zhao C, Zhang S, et al. The amount of RNA editing sites in liverwort organellar genes is correlated with GC content and nuclear PPR protein diversity. Genome biology and evolution, 2019, 11(11): 3233-3239.
	Marchantia polymorpha	-	0	Experimentally Identified	Dong S, Zhao C, Zhang S, et al. The amount of RNA editing sites in liverwort organellar genes is correlated with GC content and nuclear PPR protein diversity. Genome biology and evolution, 2019, 11(11): 3233-3239.
	Lunularia cruciata	-	0	Experimentally Identified	Dong S, Zhao C, Zhang S, et al. The amount of RNA editing sites in liverwort organellar genes is correlated with GC content and nuclear PPR protein diversity. Genome biology and evolution, 2019, 11(11): 3233-3239.
	Blasia pusilla	-	0	Experimentally Identified	Dong S, Zhao C, Zhang S, et al. The amount of RNA editing sites in liverwort organellar genes is correlated with GC content and nuclear PPR protein diversity. Genome biology and evolution, 2019, 11(11): 3233-3239.
	Haplomitrium mnioides	protein-coding genes (coding region)	226/229#	Experimentally Identified	Dong S, Zhao C, Zhang S, et al. The amount of RNA editing sites in liverwort organellar genes is correlated with GC content and nuclear PPR protein diversity. Genome biology and evolution, 2019, 11(11): 3233-3239.
	Treubia lacunosa	protein-coding genes (coding region)	1	Experimentally Identified	Dong S, Zhao C, Zhang S, et al. The amount of RNA editing sites in liverwort organellar genes is correlated with GC content and nuclear PPR protein diversity. Genome biology and evolution, 2019, 11(11): 3233-3239.
Lycophytes	Selaginella uncinata	plastome	> 3494	Experimentally Identified	Oldenkott B, Yamaguchi K, Tsuji-Tsukinoki S, et al. Chloroplast RNA editing going extreme: more than 3400 events of C-to-U editing in the chloroplast transcriptome of the lycophyte Selaginella uncinata. Rna, 2014, 20(10): 1499-1506.
	Selaginella epidophylla	plastome	720	Experimentally Identified	Smith D R. Unparalleled variation in RNA editing among Selaginella plastomes. Plant physiology, 2020, 182(1): 12-14.
	Selaginella kraussiana	plastome	1353	Experimentally Identified	Smith D R. Unparalleled variation in RNA editing among Selaginella plastomes. Plant physiology, 2020, 182(1): 12-14.
Mosses	Physcomitrium patens	protein-coding genes (coding region) + 5'UTR	2	Experimentally Identified	Miyata Y, Sugita M. Tissue-and stage-specific RNA editing of rps14 transcripts in moss (Physcomitrella patens) chloroplasts. Journal of plant physiology, 2004, 161(1): 113-115.
	Takakia lepidozioides	plastome	302	Experimentally Identified	Yura K, Miyata Y, Arikawa T, et al. Characteristics and prediction of RNA editing sites in transcripts of the moss Takakia lepidozioides chloroplast. DNA research, 2008, 15(5): 309-321.
*, Complete loss of RNA editing sites
#, Number of RNA editing sites identified with different approaches
