# Supplementary material for: A Comprehensive Evolutionary Study of Chloroplast RNA Editing in Gymnosperms: A Novel Type of G-to-A RNA Editing Is Common in Gymnosperms
Source: Int J Mol Sci. 2022 Sep 16;23(18):10844. doi: 10.3390/ijms231810844 (PMC9505161; doi:10.3390/ijms231810844)
Supplement: Supplementary file 1 [file ijms-23-10844-s001.zip › Table S3.xlsx]

## Sheet: Sheet1
Table S3. Summary of gain and loss events of C-to-U RNA editing sties for genes containing editing sites in at least ten species in 19 gymnosperm species.
	ycf3		psbZ		petB		petD		ccsA		rps8		rps14		atpA		atpI		ndhA		ndhE		rpoA		rpoB		rpoC2		Total number of genes gained C-to-U RNA editing sites	Total number of genes lost C-to-U RNA editing sites
	gain	loss	gain	loss	gain	loss	gain	loss	gain	loss	gain	loss	gain	loss	gain	loss	gain	loss	gain	loss	gain	loss	gain	loss	gain	loss	gain	loss
Platycladus	0	0	0	1	0	0	0	0	0	0	0	0	0	1	0	0	0	0	0	1	0	0	0	0	1	1	0	0	1	4
Metasequoia	1	0	0	0	0	0	0	0	0	0	0	0	0	0	1	0	0	0	0	0	0	0	1	0	1	1	0	0	4	1
Taiwania	0	0	1	0	0	0	0	0	0	0	0	0	0	0	0	0	0	0	0	0	0	0	0	0	1	1	1	0	3	1
Cunninghamia	0	0	0	0	0	0	0	0	0	0	0	0	0	0	0	0	0	0	0	0	0	0	0	0	0	1	0	1	0	2
Taxus	0	1	0	1	1	0	0	1	0	0	0	0	0	0	0	0	0	0	0	1	0	0	0	0	0	1	0	1	1	6
Cephalotaxus	0	0	0	0	0	1	0	0	0	0	0	0	0	1	0	0	0	0	0	0	1	0	0	0	1	1	1	0	3	3
Sciadopitys	0	1	2	0	0	1	1	0	0	0	2	2	1	0	0	1	0	0	1	0	0	0	0	0	0	2	0	1	5	6
Araucaria	0	1	1	0	0	0	0	0	0	0	1	0	0	0	0	1	0	0	1	0	0	0	0	1	3	1	1	0	5	4
Podocarpus	0	0	0	0	0	0	0	0	0	0	0	2	0	0	0	0	0	0	0	0	0	1	1	0	0	2	0	1	1	4
Gnetum	0	0	0	0	0	0	0	0	0	0	0	0	0	0	0	0	0	0	0	0	0	0	0	0	0	1	0	0	0	1
Welwitschia	0	0	0	0	0	0	0	0	0	0	0	0	0	0	0	0	0	0	0	0	0	0	1	0	1	1	0	1	2	2
Ephedra	0	0	0	0	0	0	0	0	0	0	0	1	0	0	0	0	0	0	0	0	0	0	0	0	0	1	0	1	0	3
Pinus	0	0	0	1	1	1	1	0	0	2	0	0	0	0	0	3	0	1	0	0	0	0	0	1	0	4	0	1	2	8
Picea	0	0	1	0	2	0	1	0	0	0	1	1	0	0	1	0	2	0	0	0	0	0	1	1	4	1	1	0	9	3
Abies	0	0	1	0	0	1	0	0	1	0	0	0	0	0	0	1	0	0	0	0	0	0	0	1	0	5	0	3	2	5
Cedrus	0	0	0	1	0	1	0	0	0	0	0	1	0	0	0	1	0	1	0	0	0	0	0	1	6	1	2	0	2	7
Ginkgo	3	0	2	0	0	0	2	0	3	1	2	1	2	0	3	1	2	0	0	1	2	0	4	1	6	2	5	1	12	7
Zamia	1	1	1	0	0	1	1	1	3	0	3	1	0	1	1	1	0	0	3	0	1	0	3	1	7	1	4	1	11	9
Cycas	0	0	0	0	0	0	0	0	0	1	2	1	0	0	1	1	0	0	1	2	1	1	0	2	0	7	0	5	4	8
Liriodendron	0	0	0	0	0	1	1	1	0	0	1	1	0	0	1	0	0	0	0	4	0	1	1	0	0	5	0	3	4	7
Nymphaea	0	2	0	0	0	1	0	0	0	0	0	1	0	0	0	3	0	2	3	0	0	0	0	1	2	1	0	0	2	7
Amborella	1	0	0	0	0	0	0	1	2	0	0	1	0	0	1	1	1	0	3	0	0	0	0	1	4	1	0	0	6	5
Gymnosperms	0	1	0	0	0	1	1	0	1	0	1	1	0	0	1	1	0	1	0	1	0	0	1	1	2	3	1	1	7	9
Conifer II+Pinaceae+Gnetales	0	1	1	0	1	0	0	0	0	0	1	0	0	0	0	2	1	1	0	0	0	0	0	2	1	3	0	2	5	6
Pinaceae+Gnetales	0	1	0	0	0	0	0	1	1	1	0	1	0	0	0	1	0	0	0	1	0	0	0	1	1	2	0	1	2	9
Pinaceae	0	0	2	0	1	0	2	0	2	0	1	0	0	0	1	0	1	0	0	0	0	0	1	0	2	1	1	0	10	1
(Abies,Cedrus)	0	0	0	0	0	0	0	0	3	0	1	0	0	0	0	0	1	0	0	0	0	0	0	0	2	1	1	0	5	1
(Pinus,Picea)	0	1	0	0	1	0	0	0	0	1	0	0	0	0	0	0	0	0	0	0	0	0	0	0	1	1	0	0	2	3
Gnetales	0	1	0	1	0	1	0	1	0	1	0	3	0	1	0	1	0	1	0	0	0	0	0	1	1	3	0	1	1	12
(Gnetum,Welwitschia)	0	0	0	0	0	0	0	0	0	0	0	1	0	0	0	0	0	0	0	0	0	0	0	0	1	1	0	0	1	2
Conifer II	0	0	0	0	0	1	1	0	0	0	1	0	0	0	0	1	0	0	1	0	1	0	0	1	1	2	0	1	5	5
Conifer II excluding Araucaria+Podocarpus	0	0	1	0	0	1	0	0	1	0	1	0	0	0	0	0	0	0	0	0	0	0	0	1	1	2	0	1	4	4
((Taxus,Cephalotaxus),(Cunninghamia,(Taiwania,(Platycladus,Metasequoia))))	0	0	0	0	0	0	0	0	0	0	0	2	0	0	0	0	0	0	0	0	0	0	0	0	1	1	1	0	2	2
Cupressaceae	0	0	0	0	0	0	0	1	0	0	0	1	0	0	0	0	0	1	0	1	0	0	0	0	1	1	0	0	1	5
(Taiwania,(Platycladus,Metasequoia))	0	0	0	0	0	0	0	0	0	0	0	0	0	0	0	1	0	0	0	0	0	0	0	0	1	1	1	0	2	2
(Platycladus,Metasequoia)	0	0	0	0	0	0	0	0	0	0	0	0	0	0	0	0	0	0	0	0	0	0	0	0	1	1	1	1	2	2
(Taxus,Cephalotaxus)	0	0	0	0	0	0	0	0	0	1	1	1	0	0	0	0	0	0	0	0	0	0	0	0	1	1	1	0	3	3
(Araucaria,Podocarpus)	0	0	0	1	0	0	0	0	0	1	1	0	0	0	0	0	0	0	0	0	0	0	0	0	1	1	0	1	2	4
Ginkgoaceae+Cycadales	1	0	1	0	0	1	1	0	1	0	1	1	1	0	1	1	1	1	0	1	1	0	3	0	4	2	3	0	12	6
Cycadales	1	1	0	1	0	0	0	1	1	1	2	1	0	1	1	3	0	0	1	0	0	0	2	2	3	4	2	2	8	10
Angiosperms	1	0	0	0	1	0	0	1	1	0	1	1	0	0	2	1	2	0	2	0	0	0	1	1	4	2	1	1	10	6
(Liriodendron,Nymphaea)	0	0	1	0	0	0	0	0	0	1	0	0	1	0	0	1	0	0	1	1	0	0	0	0	1	3	0	0	4	4
Total number of species and nodes gained/lost C-to-U RNA editing sites	7	11	12	7	7	13	10	9	12	10	18	21	4	5	12	20	8	8	10	10	6	3	12	18	32	42	17	22
