# Supplementary material for: A Comprehensive Evolutionary Study of Chloroplast RNA Editing in Gymnosperms: A Novel Type of G-to-A RNA Editing Is Common in Gymnosperms
Source: Int J Mol Sci. 2022 Sep 16;23(18):10844. doi: 10.3390/ijms231810844 (PMC9505161; doi:10.3390/ijms231810844)
Supplement: Supplementary file 1 [file ijms-23-10844-s001.zip › Table S7.xlsx]

## Sheet: Cycas revoluta
Table S7. Detailed information on the RNA editing sites identified in 19 gymnosperm species.
Species	Coordinate	Gbase	EditType	Cycas.RNA_baseCount[A	C	G	T	total	Strand	frequency	TargetedGenomicFeature	TargetedFeatureID	CodonChange	AminoAcidChange
Cycas revoluta	3025	C	G->A	3	549	1	349	902	-	0.388641	gene;rRNA	rrn23_rRNA-N1;rrn23_gene-N1	-	-
Cycas revoluta	25323	C	C->T	0	127	0	11	138	+	0.0797101	-	-	-	-
Cycas revoluta	25912	C	C->T	0	20	0	157	177	+	0.887006	CDS;gene	rpl2_CDS-N1;rpl2_gene-N1	rpl2:CTC->CTT	rpl2:L94L
Cycas revoluta	26843	C	C->T	0	32	0	160	192	+	0.833333	CDS;gene	rpl2_CDS-N2;rpl2_gene-N1	rpl2:TCG->TTG	rpl2:S172L
Cycas revoluta	27137	C	C->T	0	10	0	55	65	+	0.846154	CDS;gene	rpl2_CDS-N2;rpl2_gene-N1	rpl2:TCA->TTA	rpl2:S270L
Cycas revoluta	27269	C	C->T	0	19	0	248	267	+	0.928839	CDS;gene	rps19_CDS-N1;rps19_gene-N1	rps19:TCA->TTA	rps19:S15L
Cycas revoluta	27904	C	C->T	0	176	0	11	187	+	0.0588235	CDS;gene	rpl22_CDS-N1;rpl22_gene-N1	rpl22:AAC->AAT	rpl22:N121N
Cycas revoluta	28528	C	C->T	0	10	1	240	251	+	0.956175	CDS;gene	rps3_CDS-N1;rps3_gene-N1	rps3:CAT->TAT	rps3:H195Y
Cycas revoluta	29150	C	C->T	0	72	0	103	175	+	0.588571	gene;intron	rpl16_gene-N1;rpl16_intron-N1	-	-
Cycas revoluta	29295	C	C->T	0	14	0	245	259	+	0.945946	gene;intron	rpl16_gene-N1;rpl16_intron-N1	-	-
Cycas revoluta	29433	G	G->A	7	0	42	0	49	+	0.142857	gene;intron	rpl16_gene-N1;rpl16_intron-N1	-	-
Cycas revoluta	30195	C	C->T	0	1	0	21	22	+	0.954545	CDS;gene	rpl14_CDS-N1;rpl14_gene-N1	rpl14:TCA->TTA	rpl14:S8L
Cycas revoluta	30843	C	C->T	0	5	0	38	43	+	0.883721	CDS;gene	rps8_CDS-N1;rps8_gene-N1	rps8:TCG->TTG	rps8:S59L
Cycas revoluta	30897	C	C->T	0	23	0	12	35	+	0.342857	CDS;gene	rps8_CDS-N1;rps8_gene-N1	rps8:TCA->TTA	rps8:S77L
Cycas revoluta	30906	C	C->T	0	30	0	8	38	+	0.210526	CDS;gene	rps8_CDS-N1;rps8_gene-N1	rps8:ACT->ATT	rps8:T80I
Cycas revoluta	31061	C	C->T	0	4	0	39	43	+	0.906977	CDS;gene	rps8_CDS-N1;rps8_gene-N1	rps8:CGG->TGG	rps8:R132W
Cycas revoluta	31283	C	C->T	0	3	0	18	21	+	0.857143	CDS;gene	infA_CDS-N1;infA_gene-N1	infA:CCA->CTA	infA:P33L
Cycas revoluta	32516	C	C->T	0	6	0	11	17	+	0.647059	CDS;gene	rpoA_CDS-N1;rpoA_gene-N1	rpoA:CCG->CTG	rpoA:P100L
Cycas revoluta	33024	C	C->T	0	12	0	3	15	+	0.2	CDS;gene	rpoA_CDS-N1;rpoA_gene-N1	rpoA:TTC->TTT	rpoA:F269F
Cycas revoluta	33047	C	C->T	0	0	0	16	16	+	1	CDS;gene	rpoA_CDS-N1;rpoA_gene-N1	rpoA:TCA->TTA	rpoA:S277L
Cycas revoluta	33229	C	C->T	0	7	0	6	13	+	0.461538	CDS;gene	rpoA_CDS-N1;rpoA_gene-N1	rpoA:CAG->TAG	rpoA:Q338U
Cycas revoluta	33472	G	C->T	3	0	0	0	3	-	1	CDS;gene	petD_CDS-N2;petD_gene-N1	petD:CAG->TAG	petD:Q161U
Cycas revoluta	33612	G	C->T	7	0	0	0	7	-	1	CDS;gene	petD_CDS-N2;petD_gene-N1	petD:CCA->CTA	petD:P114L
Cycas revoluta	34879	G	C->T	8	0	0	0	8	-	1	CDS;gene	petB_CDS-N2;petB_gene-N1	petB:CCA->TCA	petB:P212S
Cycas revoluta	36126	G	C->T	4	0	7	0	11	-	0.363636	gene;intron	petB_gene-N1;petB_intron-N1	-	-
Cycas revoluta	36473	G	C->T	12	0	1	0	13	-	0.923077	CDS;gene	psbH_CDS-N1;psbH_gene-N1	psbH:CCG->CTG	psbH:P58L
Cycas revoluta	37072	G	C->T	6	0	20	0	26	-	0.230769	-	-	-	-
Cycas revoluta	37367	G	C->T	29	0	3	0	32	-	0.90625	CDS;gene	psbB_CDS-N1;psbB_gene-N1	psbB:TTC->TTT	psbB:F464F
Cycas revoluta	37562	G	C->T	4	0	38	0	42	-	0.0952381	CDS;gene	psbB_CDS-N1;psbB_gene-N1	psbB:GTC->GTT	psbB:V399V
Cycas revoluta	38301	G	C->T	10	0	1	0	11	-	0.909091	CDS;gene	psbB_CDS-N1;psbB_gene-N1	psbB:TCT->TTT	psbB:S153F
Cycas revoluta	40085	C	C->T	0	3	0	68	71	+	0.957746	CDS;gene	clpP_CDS-N2;clpP_gene-N1	clpP:CCG->CTG	clpP:P28L
Cycas revoluta	40175	C	C->T	0	3	0	32	35	+	0.914286	CDS;gene	clpP_CDS-N2;clpP_gene-N1	clpP:CCA->CTA	clpP:P58L
Cycas revoluta	40295	C	C->T	0	4	0	30	34	+	0.882353	CDS;gene	clpP_CDS-N2;clpP_gene-N1	clpP:TCT->TTT	clpP:S98F
Cycas revoluta	42397	C	C->T	0	1	0	16	17	+	0.941176	CDS;gene	rpl20_CDS-N1;rpl20_gene-N1	rpl20:TCA->TTA	rpl20:S90L
Cycas revoluta	42697	G	C->T	26	0	19	0	45	-	0.577778	CDS;gene	rps18_CDS-N1;rps18_gene-N1	rps18:TCA->TTA	rps18:S68L
Cycas revoluta	42700	G	C->T	29	0	15	0	44	-	0.659091	CDS;gene	rps18_CDS-N1;rps18_gene-N1	rps18:TCG->TTG	rps18:S67L
Cycas revoluta	42706	G	C->T	38	0	4	0	42	-	0.904762	CDS;gene	rps18_CDS-N1;rps18_gene-N1	rps18:CCA->CTA	rps18:P65L
Cycas revoluta	42817	G	C->T	23	0	35	0	58	-	0.396552	CDS;gene	rps18_CDS-N1;rps18_gene-N1	rps18:TCA->TTA	rps18:S28L
Cycas revoluta	42833	G	C->T	58	0	20	0	78	-	0.74359	CDS;gene	rps18_CDS-N1;rps18_gene-N1	rps18:CAT->TAT	rps18:H23Y
Cycas revoluta	43170	G	C->T	25	0	2	0	27	-	0.925926	CDS;gene	rpl33_CDS-N1;rpl33_gene-N1	rpl33:TCG->TTG	rpl33:S46L
Cycas revoluta	44608	G	C->T	36	0	21	0	57	-	0.631579	CDS;gene	petG_CDS-N1;petG_gene-N1	petG:TCT->TTT	petG:S22F
Cycas revoluta	44611	G	C->T	35	0	22	0	57	-	0.614035	CDS;gene	petG_CDS-N1;petG_gene-N1	petG:TCA->TTA	petG:S21L
Cycas revoluta	44620	G	C->T	19	0	37	0	56	-	0.339286	CDS;gene	petG_CDS-N1;petG_gene-N1	petG:TCG->TTG	petG:S18L
Cycas revoluta	44656	G	C->T	24	0	16	0	40	-	0.6	CDS;gene	petG_CDS-N1;petG_gene-N1	petG:CCC->CTC	petG:P6L
Cycas revoluta	44846	G	C->T	18	0	6	0	24	-	0.75	CDS;gene	petL_CDS-N1;petL_gene-N1	petL:TCA->TTA	petL:S31L
Cycas revoluta	44915	G	C->T	16	0	20	0	36	-	0.444444	CDS;gene	petL_CDS-N1;petL_gene-N1	petL:CCT->CTT	petL:P8L
Cycas revoluta	44918	G	C->T	12	0	22	0	34	-	0.352941	CDS;gene	petL_CDS-N1;petL_gene-N1	petL:ACG->ATG	petL:T7M
Cycas revoluta	45784	G	C->T	7	0	20	0	27	-	0.259259	-	-	-	-
Cycas revoluta	46915	C	C->T	0	0	0	9	9	+	1	CDS;gene	psbE_CDS-N1;psbE_gene-N1	psbE:TCC->TTC	psbE:S70F
Cycas revoluta	46920	C	C->T	0	0	0	7	7	+	1	CDS;gene	psbE_CDS-N1;psbE_gene-N1	psbE:CCG->TCG	psbE:P72S
Cycas revoluta	47216	C	C->T	0	0	0	11	11	+	1	CDS;gene	psbL_CDS-N1;psbL_gene-N1	psbL:TCT->TTT	psbL:S36F
Cycas revoluta	50106	G	C->T	3	0	1	0	4	-	0.75	CDS;gene	cemA_CDS-N1;cemA_gene-N1	cemA:CCA->CTA	cemA:P120L
Cycas revoluta	51612	G	C->T	7	0	0	0	7	-	1	CDS;gene	ycf4_CDS-N1;ycf4_gene-N1	ycf4:CGG->TGG	ycf4:R24W
Cycas revoluta	52237	G	C->T	20	0	4	0	24	-	0.833333	CDS;gene	psaI_CDS-N1;psaI_gene-N1	psaI:GCG->GTG	psaI:A14V
Cycas revoluta	52268	G	C->T	19	0	6	0	25	-	0.76	CDS;gene	psaI_CDS-N1;psaI_gene-N1	psaI:CCC->TCC	psaI:P4S
Cycas revoluta	52440	G	C->T	12	0	19	0	31	-	0.387097	-	-	-	-
Cycas revoluta	52766	G	C->T	9	0	3	0	12	-	0.75	CDS;gene	accD_CDS-N1;accD_gene-N1	accD:CAG->TAG	accD:Q350U
Cycas revoluta	52918	G	C->T	13	0	0	0	13	-	1	CDS;gene	accD_CDS-N1;accD_gene-N1	accD:CCA->CTA	accD:P299L
Cycas revoluta	52969	G	C->T	10	0	0	0	10	-	1	CDS;gene	accD_CDS-N1;accD_gene-N1	accD:TCA->TTA	accD:S282L
Cycas revoluta	53026	G	C->T	6	0	1	0	7	-	0.857143	CDS;gene	accD_CDS-N1;accD_gene-N1	accD:TCA->TTA	accD:S263L
Cycas revoluta	53395	G	C->T	9	0	0	0	9	-	1	CDS;gene	accD_CDS-N1;accD_gene-N1	accD:CCA->CTA	accD:P140L
Cycas revoluta	53503	G	C->T	4	0	0	0	4	-	1	CDS;gene	accD_CDS-N1;accD_gene-N1	accD:CCA->CTA	accD:P104L
Cycas revoluta	53551	G	C->T	6	0	0	0	6	-	1	CDS;gene	accD_CDS-N1;accD_gene-N1	accD:TCA->TTA	accD:S88L
Cycas revoluta	53654	G	C->T	4	0	1	0	5	-	0.8	CDS;gene	accD_CDS-N1;accD_gene-N1	accD:CGT->TGT	accD:R54C
Cycas revoluta	53767	G	C->T	7	0	0	0	7	-	1	CDS;gene	accD_CDS-N1;accD_gene-N1	accD:TCA->TTA	accD:S16L
Cycas revoluta	53846	G	C->T	4	0	0	0	4	-	1	-	-	-	-
Cycas revoluta	56358	G	G->A	21	0	288	0	309	+	0.0679612	-	-	-	-
Cycas revoluta	56433	C	C->T	0	622	0	34	656	+	0.0518293	-	-	-	-
Cycas revoluta	57467	C	C->T	0	167	0	25	192	+	0.130208	CDS;gene	atpB_CDS-N1;atpB_gene-N1	atpB:GTC->GTT	atpB:V261V
Cycas revoluta	57689	C	C->T	0	158	0	9	167	+	0.0538922	CDS;gene	atpB_CDS-N1;atpB_gene-N1	atpB:CCC->CCT	atpB:P335P
Cycas revoluta	58317	C	C->T	0	101	0	10	111	+	0.0900901	CDS;gene	atpE_CDS-N1;atpE_gene-N1	atpE:ACA->ATA	atpE:T49I
Cycas revoluta	64376	C	C->T	0	1	0	5	6	+	0.833333	CDS;gene	ndhK_CDS-N1;ndhK_gene-N1	ndhK:CAA->TAA	ndhK:Q255U
Cycas revoluta	64801	C	C->T	0	0	0	4	4	+	1	CDS;gene	ndhJ_CDS-N1;ndhJ_gene-N1	ndhJ:CAT->TAT	ndhJ:H137Y
Cycas revoluta	69032	C	C->T	0	2	0	5	7	+	0.714286	-	-	-	-
Cycas revoluta	69137	C	C->T	0	3	0	10	13	+	0.769231	CDS;gene	ycf3_CDS-N1;ycf3_gene-N1	ycf3:ACT->ATT	ycf3:T11I
Cycas revoluta	70002	C	C->T	0	5	0	5	10	+	0.5	CDS;gene	ycf3_CDS-N2;ycf3_gene-N1	ycf3:CCG->CTG	ycf3:P64L
Cycas revoluta	70951	C	C->T	0	4	0	8	12	+	0.666667	CDS;gene	ycf3_CDS-N3;ycf3_gene-N1	ycf3:TCC->TTC	ycf3:S136F
Cycas revoluta	76421	C	C->T	0	0	0	47	47	+	1	CDS;gene	rps14_CDS-N1;rps14_gene-N1	rps14:TCA->TTA	rps14:S50L
Cycas revoluta	76465	C	C->T	0	28	0	3	31	+	0.0967742	CDS;gene	rps14_CDS-N1;rps14_gene-N1	rps14:CTG->TTG	rps14:L65L
Cycas revoluta	80816	G	C->T	16	0	294	0	310	-	0.0516129	-	-	-	-
Cycas revoluta	87670	C	C->T	0	0	0	3	3	+	1	CDS;gene	rpoB_CDS-N1;rpoB_gene-N1	rpoB:CCA->CTA	rpoB:P575L
Cycas revoluta	87685	C	C->T	0	0	0	3	3	+	1	CDS;gene	rpoB_CDS-N1;rpoB_gene-N1	rpoB:GCA->GTA	rpoB:A580V
Cycas revoluta	89355	C	C->T	0	0	0	4	4	+	1	CDS;gene	rpoC1_CDS-N1;rpoC1_gene-N1	rpoC1:TCG->TTG	rpoC1:S55L
Cycas revoluta	90360	C	C->T	0	2	0	3	5	+	0.6	CDS;gene	rpoC1_CDS-N2;rpoC1_gene-N1	rpoC1:TCA->TTA	rpoC1:S157L
Cycas revoluta	90369	C	C->T	0	1	0	3	4	+	0.75	CDS;gene	rpoC1_CDS-N2;rpoC1_gene-N1	rpoC1:TCA->TTA	rpoC1:S160L
Cycas revoluta	90621	C	C->T	0	2	0	6	8	+	0.75	CDS;gene	rpoC1_CDS-N2;rpoC1_gene-N1	rpoC1:TCG->TTG	rpoC1:S244L
Cycas revoluta	91359	C	C->T	0	0	0	4	4	+	1	CDS;gene	rpoC1_CDS-N2;rpoC1_gene-N1	rpoC1:TCC->TTC	rpoC1:S490F
Cycas revoluta	94040	C	C->T	0	1	0	4	5	+	0.8	CDS;gene	rpoC2_CDS-N1;rpoC2_gene-N1	rpoC2:CTT->TTT	rpoC2:L669F
Cycas revoluta	95832	C	C->T	0	1	0	3	4	+	0.75	CDS;gene	rpoC2_CDS-N1;rpoC2_gene-N1	rpoC2:GCA->GTA	rpoC2:A1266V
Cycas revoluta	96586	C	C->T	0	0	0	9	9	+	1	CDS;gene	rps2_CDS-N1;rps2_gene-N1	rps2:CCG->CTG	rps2:P72L
Cycas revoluta	96715	C	C->T	0	3	0	16	19	+	0.842105	CDS;gene	rps2_CDS-N1;rps2_gene-N1	rps2:CCC->CTC	rps2:P115L
Cycas revoluta	96725	C	C->T	0	4	0	14	18	+	0.777778	CDS;gene	rps2_CDS-N1;rps2_gene-N1	rps2:TTC->TTT	rps2:F118F
Cycas revoluta	96760	C	C->T	0	0	0	22	22	+	1	CDS;gene	rps2_CDS-N1;rps2_gene-N1	rps2:TCC->TTC	rps2:S130F
Cycas revoluta	97668	C	C->T	0	85	0	186	271	+	0.686347	CDS;gene	atpI_CDS-N1;atpI_gene-N1	atpI:CTT->TTT	atpI:L107F
Cycas revoluta	98224	C	C->T	0	44	0	50	94	+	0.531915	-	-	-	-
Cycas revoluta	98243	C	C->T	0	95	0	6	101	+	0.0594059	-	-	-	-
Cycas revoluta	98575	C	G->A	0	68	0	28	96	+	0.291667	CDS;gene	orf64a_CDS-N1;orf64a_gene-N1	orf64a:GGA->AAA	orf64a:G41K
Cycas revoluta	98576	C	G->A	0	97	0	12	109	+	0.110092	CDS;gene	orf64a_CDS-N1;orf64a_gene-N1	orf64a:GGA->AAA	orf64a:G41K
Cycas revoluta	99276	C	C->T	0	139	0	18	157	+	0.11465	-	-	-	-
Cycas revoluta	100515	C	C->T	0	280	0	23	303	+	0.0759076	CDS;gene	atpF_CDS-N2;atpF_gene-N1	atpF:CAT->TAT	atpF:H170Y
Cycas revoluta	100922	C	C->T	0	12	0	118	130	+	0.907692	CDS;gene	atpA_CDS-N1;atpA_gene-N1	atpA:TCG->TTG	atpA:S105L
Cycas revoluta	100994	C	C->T	0	7	0	107	114	+	0.938596	CDS;gene	atpA_CDS-N1;atpA_gene-N1	atpA:TCG->TTG	atpA:S129L
Cycas revoluta	103822	G	C->T	3	0	53	0	56	-	0.0535714	-	-	-	-
Cycas revoluta	104042	C	C->T	0	267	0	1523	1790	+	0.850838	-	-	-	-
Cycas revoluta	104045	C	C->T	0	1482	0	290	1772	+	0.163657	-	-	-	-
Cycas revoluta	104061	C	C->T	0	1422	0	112	1534	+	0.0730117	-	-	-	-
Cycas revoluta	105118	G	C->T	9	0	149	0	158	-	0.056962	-	-	-	-
Cycas revoluta	105341	G	C->T	123	0	138	0	261	-	0.471264	-	-	-	-
Cycas revoluta	107097	C	C->T	0	2	0	19	21	+	0.904762	CDS;gene	chlB_CDS-N1;chlB_gene-N1	chlB:CGG->TGG	chlB:R293W
Cycas revoluta	107191	C	C->T	0	1	0	18	19	+	0.947368	CDS;gene	chlB_CDS-N1;chlB_gene-N1	chlB:TCT->TTT	chlB:S324F
Cycas revoluta	107497	C	C->T	0	5	0	24	29	+	0.827586	CDS;gene	chlB_CDS-N1;chlB_gene-N1	chlB:CCA->CTA	chlB:P426L
Cycas revoluta	107878	C	C->T	0	32	0	5	37	+	0.135135	-	-	-	-
Cycas revoluta	108138	C	C->T	0	2	0	225	227	+	0.991189	gene;intron	rps16_gene-N1;rps16_intron-N1	-	-
Cycas revoluta	108284	C	C->T	0	136	0	14	150	+	0.0933333	gene;intron	rps16_gene-N1;rps16_intron-N1	-	-
Cycas revoluta	108495	C	C->T	0	166	0	30	196	+	0.153061	gene;intron	rps16_gene-N1;rps16_intron-N1	-	-
Cycas revoluta	109102	C	C->T	0	23	0	54	77	+	0.701299	-	-	-	-
Cycas revoluta	109145	C	C->T	0	24	0	148	172	+	0.860465	-	-	-	-
Cycas revoluta	111042	C	C->T	0	10	0	5	15	+	0.333333	CDS;gene	matK_CDS-N1;matK_gene-N1	matK:ACT->ATT	matK:T157I
Cycas revoluta	111105	C	C->T	0	7	0	10	17	+	0.588235	CDS;gene	matK_CDS-N1;matK_gene-N1	matK:TCA->TTA	matK:S178L
Cycas revoluta	111890	C	C->T	0	9	0	10	19	+	0.526316	CDS;gene	matK_CDS-N1;matK_gene-N1	matK:CCA->TCA	matK:P440S
Cycas revoluta	112153	C	C->T	0	10	0	10	20	+	0.5	-	-	-	-
Cycas revoluta	136115	G	G->A	387	0	465	0	852	+	0.454225	gene;rRNA	rrn23_gene-N2;rrn23_rRNA-N2	-	-
Cycas revoluta	140646	C	C->T	0	29	0	4	33	+	0.121212	CDS;gene	chlN_CDS-N1;chlN_gene-N1	chlN:ATC->ATT	chlN:I75I
Cycas revoluta	141050	C	C->T	0	1	0	25	26	+	0.961538	CDS;gene	chlN_CDS-N1;chlN_gene-N1	chlN:CCG->CTG	chlN:P210L
Cycas revoluta	141268	C	C->T	0	8	0	44	52	+	0.846154	CDS;gene	chlN_CDS-N1;chlN_gene-N1	chlN:CCT->TCT	chlN:P283S
Cycas revoluta	141766	C	C->T	0	20	0	25	45	+	0.555556	CDS;gene	chlN_CDS-N1;chlN_gene-N1	chlN:CGG->TGG	chlN:R449W
Cycas revoluta	142706	C	C->T	0	0	0	3	3	+	1	CDS;gene	ycf1_CDS-N1;ycf1_gene-N1	ycf1:TCA->TTA	ycf1:S203L
Cycas revoluta	143576	C	C->T	0	1	0	4	5	+	0.8	CDS;gene	ycf1_CDS-N1;ycf1_gene-N1	ycf1:TCA->TTA	ycf1:S493L
Cycas revoluta	144054	C	C->T	0	0	0	3	3	+	1	CDS;gene	ycf1_CDS-N1;ycf1_gene-N1	ycf1:TTC->TTT	ycf1:F652F
Cycas revoluta	145667	C	C->T	0	1	0	3	4	+	0.75	CDS;gene	ycf1_CDS-N1;ycf1_gene-N1	ycf1:TCA->TTA	ycf1:S1190L
Cycas revoluta	149411	C	C->T	0	1	0	5	6	+	0.833333	CDS;gene	ndhA_CDS-N1;ndhA_gene-N1	ndhA:CCT->CTT	ndhA:P8L
Cycas revoluta	149955	C	C->T	0	1	0	4	5	+	0.8	gene;intron	ndhA_gene-N1;ndhA_intron-N1	-	-
Cycas revoluta	153413	C	C->T	0	0	0	3	3	+	1	CDS;gene	ndhE_CDS-N1;ndhE_gene-N1	ndhE:TCA->TTA	ndhE:S98L
Cycas revoluta	154324	C	C->T	0	0	0	4	4	+	1	CDS;gene	ndhD_CDS-N1;ndhD_gene-N1	ndhD:TCA->TTA	ndhD:S20L
Cycas revoluta	154801	C	C->T	0	0	0	3	3	+	1	CDS;gene	ndhD_CDS-N1;ndhD_gene-N1	ndhD:TCA->TTA	ndhD:S179L
Cycas revoluta	154813	C	C->T	0	0	0	3	3	+	1	CDS;gene	ndhD_CDS-N1;ndhD_gene-N1	ndhD:TCA->TTA	ndhD:S183L
Cycas revoluta	155389	C	C->T	0	0	0	3	3	+	1	CDS;gene	ndhD_CDS-N1;ndhD_gene-N1	ndhD:TCT->TTT	ndhD:S375F
Cycas revoluta	155458	C	C->T	0	1	0	4	5	+	0.8	CDS;gene	ndhD_CDS-N1;ndhD_gene-N1	ndhD:TCT->TTT	ndhD:S398F
Cycas revoluta	155559	C	C->T	0	0	0	5	5	+	1	CDS;gene	ndhD_CDS-N1;ndhD_gene-N1	ndhD:CAT->TAT	ndhD:H432Y
Cycas revoluta	155689	C	C->T	0	0	0	3	3	+	1	CDS;gene	ndhD_CDS-N1;ndhD_gene-N1	ndhD:ACT->ATT	ndhD:T475I
Cycas revoluta	155695	C	C->T	0	0	0	3	3	+	1	CDS;gene	ndhD_CDS-N1;ndhD_gene-N1	ndhD:ACT->ATT	ndhD:T477I
Cycas revoluta	156165	G	C->T	4	0	0	0	4	-	1	CDS;gene	ccsA_CDS-N1;ccsA_gene-N1	ccsA:TCT->TTT	ccsA:S297F
Cycas revoluta	159797	C	C->T	0	45	0	9	54	+	0.166667	-	-	-	-
Cycas revoluta	160073	C	C->T	0	23	0	22	45	+	0.488889	CDS;gene	ndhF_CDS-N1;ndhF_gene-N1	ndhF:TCG->TTG	ndhF:S24L
Cycas revoluta	160174	C	C->T	0	21	0	23	44	+	0.522727	CDS;gene	ndhF_CDS-N1;ndhF_gene-N1	ndhF:CTA->TTA	ndhF:L58L
Cycas revoluta	160250	C	C->T	0	34	0	23	57	+	0.403509	CDS;gene	ndhF_CDS-N1;ndhF_gene-N1	ndhF:CCA->CTA	ndhF:P83L
Cycas revoluta	160292	C	C->T	0	13	0	21	34	+	0.617647	CDS;gene	ndhF_CDS-N1;ndhF_gene-N1	ndhF:CCA->CTA	ndhF:P97L
Cycas revoluta	160298	C	C->T	0	17	0	20	37	+	0.540541	CDS;gene	ndhF_CDS-N1;ndhF_gene-N1	ndhF:TCA->TTA	ndhF:S99L
Cycas revoluta	160493	C	C->T	0	6	0	18	24	+	0.75	CDS;gene	ndhF_CDS-N1;ndhF_gene-N1	ndhF:TCC->TTC	ndhF:S164F
Cycas revoluta	160637	C	C->T	0	8	0	20	28	+	0.714286	CDS;gene	ndhF_CDS-N1;ndhF_gene-N1	ndhF:TCT->TTT	ndhF:S212F
Cycas revoluta	160670	C	C->T	0	4	0	22	26	+	0.846154	CDS;gene	ndhF_CDS-N1;ndhF_gene-N1	ndhF:TCA->TTA	ndhF:S223L
Cycas revoluta	160830	C	C->T	0	18	0	10	28	+	0.357143	CDS;gene	ndhF_CDS-N1;ndhF_gene-N1	ndhF:CTC->CTT	ndhF:L276L
Cycas revoluta	160982	C	C->T	0	4	0	23	27	+	0.851852	CDS;gene	ndhF_CDS-N1;ndhF_gene-N1	ndhF:TCA->TTA	ndhF:S327L
Cycas revoluta	161039	C	C->T	0	4	0	12	16	+	0.75	CDS;gene	ndhF_CDS-N1;ndhF_gene-N1	ndhF:CCG->CTG	ndhF:P346L
Cycas revoluta	161189	C	C->T	0	9	0	20	29	+	0.689655	CDS;gene	ndhF_CDS-N1;ndhF_gene-N1	ndhF:ACA->ATA	ndhF:T396I
Cycas revoluta	161648	C	C->T	0	12	0	12	24	+	0.5	CDS;gene	ndhF_CDS-N1;ndhF_gene-N1	ndhF:TCA->TTA	ndhF:S549L
Cycas revoluta	161684	C	C->T	0	8	0	12	20	+	0.6	CDS;gene	ndhF_CDS-N1;ndhF_gene-N1	ndhF:TCT->TTT	ndhF:S561F
Cycas revoluta	161840	C	C->T	0	2	0	12	14	+	0.857143	CDS;gene	ndhF_CDS-N1;ndhF_gene-N1	ndhF:ACA->ATA	ndhF:T613I

## Sheet: Zamia furfuracea
Species	Coordinate	Gbase	EditType	Zamia.RNA_baseCount A	C	G	T	total	Strand	frequency	TargetedGenomicFeature	TargetedFeatureID	CodonChange	AminoAcidChange
Zamia furfuracea	759	C	G->A	0	20	0	5	25	+	0.2	CDS;gene	psbA_CDS-N1;psbA_gene-N1	psbA:GTC->ATC	psbA:V102I
Zamia furfuracea	806	G	C->T	21	0	27	0	48	+	0.4375	CDS;gene	psbA_CDS-N1;psbA_gene-N1	psbA:TCT->TTT	psbA:S86F
Zamia furfuracea	1826	G	C->T	301	0	114	0	415	-	0.725301	gene;intron	trnK-UUU_gene-N1;trnK-UUU_intron-N1	-	-
Zamia furfuracea	1929	G	C->T	563	0	18	0	581	-	0.969019	CDS;gene	matK_CDS-N1;matK_gene-N1	matK:TCA->TTA	matK:S488L
Zamia furfuracea	1929	G	C->T	563	0	18	0	581	-	0.969019	gene;intron	trnK-UUU_gene-N1;trnK-UUU_intron-N1	-	-
Zamia furfuracea	2089	G	C->T	385	0	33	0	418	-	0.921053	CDS;gene	matK_CDS-N1;matK_gene-N1	matK:CCA->TCA	matK:P435S
Zamia furfuracea	2089	G	C->T	385	0	33	0	418	-	0.921053	gene;intron	trnK-UUU_gene-N1;trnK-UUU_intron-N1	-	-
Zamia furfuracea	2494	G	C->T	541	0	46	0	587	-	0.921635	CDS;gene	matK_CDS-N1;matK_gene-N1	matK:CAT->TAT	matK:H300Y
Zamia furfuracea	2494	G	C->T	541	0	46	0	587	-	0.921635	gene;intron	trnK-UUU_gene-N1;trnK-UUU_intron-N1	-	-
Zamia furfuracea	2865	G	C->T	362	0	144	0	506	-	0.715415	CDS;gene	matK_CDS-N1;matK_gene-N1	matK:TCA->TTA	matK:S176L
Zamia furfuracea	2865	G	C->T	362	0	144	0	506	-	0.715415	gene;intron	trnK-UUU_gene-N1;trnK-UUU_intron-N1	-	-
Zamia furfuracea	2928	G	C->T	560	0	50	0	610	-	0.918033	CDS;gene	matK_CDS-N1;matK_gene-N1	matK:ACT->ATT	matK:T155I
Zamia furfuracea	2928	G	C->T	560	0	50	0	610	-	0.918033	gene;intron	trnK-UUU_gene-N1;trnK-UUU_intron-N1	-	-
Zamia furfuracea	3078	G	C->T	270	0	275	0	545	-	0.495413	CDS;gene	matK_CDS-N1;matK_gene-N1	matK:TCG->TTG	matK:S105L
Zamia furfuracea	3078	G	C->T	270	0	275	0	545	-	0.495413	gene;intron	trnK-UUU_gene-N1;trnK-UUU_intron-N1	-	-
Zamia furfuracea	3204	G	C->T	476	0	24	0	500	-	0.952	CDS;gene	matK_CDS-N1;matK_gene-N1	matK:TCA->TTA	matK:S63L
Zamia furfuracea	3204	G	C->T	476	0	24	0	500	-	0.952	gene;intron	trnK-UUU_gene-N1;trnK-UUU_intron-N1	-	-
Zamia furfuracea	4924	G	C->T	227	0	134	0	361	-	0.628809	-	-	-	-
Zamia furfuracea	4967	G	C->T	388	0	17	0	405	-	0.958025	-	-	-	-
Zamia furfuracea	4977	G	C->T	109	0	296	0	405	-	0.269136	-	-	-	-
Zamia furfuracea	5018	G	C->T	47	0	379	0	426	-	0.110329	-	-	-	-
Zamia furfuracea	5151	G	C->T	89	0	279	0	368	-	0.241848	CDS;gene	rps16_CDS-N2;rps16_gene-N1	rps16:CTA->TTA	rps16:L54L
Zamia furfuracea	6020	G	C->T	224	0	118	0	342	-	0.654971	gene;intron	rps16_gene-N1;rps16_intron-N1	-	-
Zamia furfuracea	6412	G	C->T	15	0	248	0	263	-	0.0570342	CDS;gene	chlB_CDS-N1;chlB_gene-N1	chlB:ACC->ACT	chlB:T513T
Zamia furfuracea	7995	C	C->T	0	15	0	4	19	+	0.210526	-	-	-	-
Zamia furfuracea	8591	C	C->T	0	550	0	52	602	+	0.0863787	-	-	-	-
Zamia furfuracea	8691	C	C->T	0	1	0	678	679	+	0.998527	CDS;gene	psbK_CDS-N1;psbK_gene-N1	psbK:TCT->TTT	psbK:S30F
Zamia furfuracea	8793	C	C->T	0	565	1	128	694	+	0.184438	-	-	-	-
Zamia furfuracea	8825	C	C->T	0	453	0	200	653	+	0.306279	-	-	-	-
Zamia furfuracea	8848	C	C->T	0	553	0	118	671	+	0.175857	-	-	-	-
Zamia furfuracea	9183	C	C->T	0	342	0	158	500	+	0.316	-	-	-	-
Zamia furfuracea	9230	C	C->T	0	63	0	317	380	+	0.834211	-	-	-	-
Zamia furfuracea	9239	C	G->A	0	318	0	98	416	+	0.235577	-	-	-	-
Zamia furfuracea	9474	C	C->T	0	27	0	513	540	+	0.95	CDS;gene	psbI_CDS-N1;psbI_gene-N1	psbI:CTT->TTT	psbI:L19F
Zamia furfuracea	10615	G	C->T	12	0	97	0	109	-	0.110092	-	-	-	-
Zamia furfuracea	10918	G	G->A	6	0	51	0	57	-	0.105263	gene;intron	trnG-UCC_gene-N1;trnG-UCC_intron-N1	-	-
Zamia furfuracea	11672	G	C->T	3	0	49	0	52	-	0.0576923	-	-	-	-
Zamia furfuracea	13124	G	C->T	12	0	218	0	230	-	0.0521739	CDS;gene	atpA_CDS-N1;atpA_gene-N1	atpA:ATC->ATT	atpA:I130I
Zamia furfuracea	13128	G	C->T	221	0	1	0	222	-	0.995495	CDS;gene	atpA_CDS-N1;atpA_gene-N1	atpA:TCG->TTG	atpA:S129L
Zamia furfuracea	13653	G	C->T	578	0	16	0	594	-	0.973064	CDS;gene	atpF_CDS-N2;atpF_gene-N1	atpF:TCG->TTG	atpF:S160L
Zamia furfuracea	16539	G	C->T	223	0	16	0	239	-	0.933054	CDS;gene	atpI_CDS-N1;atpI_gene-N1	atpI:CTT->TTT	atpI:L107F
Zamia furfuracea	17524	G	C->T	62	0	0	0	62	-	1	CDS;gene	rps2_CDS-N1;rps2_gene-N1	rps2:TCC->TTC	rps2:S130F
Zamia furfuracea	17559	G	C->T	36	0	31	0	67	-	0.537313	CDS;gene	rps2_CDS-N1;rps2_gene-N1	rps2:TTC->TTT	rps2:F118F
Zamia furfuracea	17698	G	C->T	36	0	9	0	45	-	0.8	CDS;gene	rps2_CDS-N1;rps2_gene-N1	rps2:CCA->CTA	rps2:P72L
Zamia furfuracea	17889	G	C->T	9	0	66	0	75	-	0.12	CDS;gene	rps2_CDS-N1;rps2_gene-N1	rps2:ATC->ATT	rps2:I8I
Zamia furfuracea	18439	G	C->T	39	0	1	0	40	-	0.975	CDS;gene	rpoC2_CDS-N1;rpoC2_gene-N1	rpoC2:GCA->GTA	rpoC2:A1267V
Zamia furfuracea	18458	G	C->T	8	0	46	0	54	-	0.148148	CDS;gene	rpoC2_CDS-N1;rpoC2_gene-N1	rpoC2:CGA->TGA	rpoC2:R1261U
Zamia furfuracea	18802	G	C->T	49	0	1	0	50	-	0.98	CDS;gene	rpoC2_CDS-N1;rpoC2_gene-N1	rpoC2:TCA->TTA	rpoC2:S1146L
Zamia furfuracea	18967	G	C->T	7	0	62	0	69	-	0.101449	CDS;gene	rpoC2_CDS-N1;rpoC2_gene-N1	rpoC2:TCT->TTT	rpoC2:S1091F
Zamia furfuracea	19726	G	C->T	52	0	0	0	52	-	1	CDS;gene	rpoC2_CDS-N1;rpoC2_gene-N1	rpoC2:TCA->TTA	rpoC2:S838L
Zamia furfuracea	19909	G	C->T	67	0	3	0	70	-	0.957143	CDS;gene	rpoC2_CDS-N1;rpoC2_gene-N1	rpoC2:CCG->CTG	rpoC2:P777L
Zamia furfuracea	20231	G	C->T	40	0	1	0	41	-	0.97561	CDS;gene	rpoC2_CDS-N1;rpoC2_gene-N1	rpoC2:CTT->TTT	rpoC2:L670F
Zamia furfuracea	21255	G	C->T	4	0	61	0	65	-	0.0615385	CDS;gene	rpoC2_CDS-N1;rpoC2_gene-N1	rpoC2:ATC->ATT	rpoC2:I328I
Zamia furfuracea	21329	G	C->T	52	0	5	0	57	-	0.912281	CDS;gene	rpoC2_CDS-N1;rpoC2_gene-N1	rpoC2:CGG->TGG	rpoC2:R304W
Zamia furfuracea	21922	G	C->T	37	0	1	0	38	-	0.973684	CDS;gene	rpoC2_CDS-N1;rpoC2_gene-N1	rpoC2:TCA->TTA	rpoC2:S106L
Zamia furfuracea	22486	C	G->A	0	68	0	4	72	-	0.0555556	CDS;gene	rpoC1_CDS-N2;rpoC1_gene-N1	rpoC1:GGA->GAA	rpoC1:G640E
Zamia furfuracea	22505	G	C->T	72	0	11	0	83	-	0.86747	CDS;gene	rpoC1_CDS-N2;rpoC1_gene-N1	rpoC1:CAT->TAT	rpoC1:H634Y
Zamia furfuracea	22915	G	C->T	60	0	5	0	65	-	0.923077	CDS;gene	rpoC1_CDS-N2;rpoC1_gene-N1	rpoC1:TCC->TTC	rpoC1:S497F
Zamia furfuracea	23032	G	C->T	76	0	14	0	90	-	0.844444	CDS;gene	rpoC1_CDS-N2;rpoC1_gene-N1	rpoC1:CCG->CTG	rpoC1:P458L
Zamia furfuracea	23284	G	C->T	49	0	10	0	59	-	0.830508	CDS;gene	rpoC1_CDS-N2;rpoC1_gene-N1	rpoC1:TCT->TTT	rpoC1:S374F
Zamia furfuracea	23500	G	C->T	76	0	8	0	84	-	0.904762	CDS;gene	rpoC1_CDS-N2;rpoC1_gene-N1	rpoC1:CCT->CTT	rpoC1:P302L
Zamia furfuracea	23509	G	C->T	22	0	65	0	87	-	0.252874	CDS;gene	rpoC1_CDS-N2;rpoC1_gene-N1	rpoC1:CCA->CTA	rpoC1:P299L
Zamia furfuracea	23653	G	C->T	90	0	0	0	90	-	1	CDS;gene	rpoC1_CDS-N2;rpoC1_gene-N1	rpoC1:TCG->TTG	rpoC1:S251L
Zamia furfuracea	23914	G	C->T	59	0	20	0	79	-	0.746835	CDS;gene	rpoC1_CDS-N2;rpoC1_gene-N1	rpoC1:TCA->TTA	rpoC1:S164L
Zamia furfuracea	24206	G	C->T	8	0	58	0	66	-	0.121212	gene;intron	rpoC1_gene-N1;rpoC1_intron-N1	-	-
Zamia furfuracea	24482	G	C->T	38	0	3	0	41	-	0.926829	gene;intron	rpoC1_gene-N1;rpoC1_intron-N1	-	-
Zamia furfuracea	24671	G	C->T	45	0	10	0	55	-	0.818182	CDS;gene	rpoC1_CDS-N1;rpoC1_gene-N1	rpoC1:TCA->TTA	rpoC1:S144L
Zamia furfuracea	24913	G	C->T	5	0	76	0	81	-	0.0617284	CDS;gene	rpoC1_CDS-N1;rpoC1_gene-N1	rpoC1:TTC->TTT	rpoC1:F63F
Zamia furfuracea	24917	G	C->T	75	0	6	0	81	-	0.925926	CDS;gene	rpoC1_CDS-N1;rpoC1_gene-N1	rpoC1:TCG->TTG	rpoC1:S62L
Zamia furfuracea	25079	G	C->T	45	0	25	0	70	-	0.642857	CDS;gene	rpoC1_CDS-N1;rpoC1_gene-N1	rpoC1:ACG->ATG	rpoC1:T8M
Zamia furfuracea	25513	G	C->T	25	0	0	0	25	-	1	CDS;gene	rpoB_CDS-N1;rpoB_gene-N1	rpoB:TCT->TTT	rpoB:S938F
Zamia furfuracea	25616	G	C->T	36	0	1	0	37	-	0.972973	CDS;gene	rpoB_CDS-N1;rpoB_gene-N1	rpoB:CCT->TCT	rpoB:P904S
Zamia furfuracea	25707	G	C->T	29	0	10	0	39	-	0.74359	CDS;gene	rpoB_CDS-N1;rpoB_gene-N1	rpoB:CCC->CTT	rpoB:P873L
Zamia furfuracea	25708	G	C->T	37	0	1	0	38	-	0.973684	CDS;gene	rpoB_CDS-N1;rpoB_gene-N1	rpoB:CCC->CTT	rpoB:P873L
Zamia furfuracea	26345	G	C->T	62	0	4	0	66	-	0.939394	CDS;gene	rpoB_CDS-N1;rpoB_gene-N1	rpoB:CAT->TAT	rpoB:H661Y
Zamia furfuracea	26587	G	C->T	16	0	18	0	34	-	0.470588	CDS;gene	rpoB_CDS-N1;rpoB_gene-N1	rpoB:GCA->GTA	rpoB:A580V
Zamia furfuracea	26602	G	C->T	37	0	3	0	40	-	0.925	CDS;gene	rpoB_CDS-N1;rpoB_gene-N1	rpoB:CCA->CTA	rpoB:P575L
Zamia furfuracea	27442	G	C->T	31	0	3	0	34	-	0.911765	CDS;gene	rpoB_CDS-N1;rpoB_gene-N1	rpoB:TCG->TTG	rpoB:S295L
Zamia furfuracea	27478	G	C->T	38	0	9	0	47	-	0.808511	CDS;gene	rpoB_CDS-N1;rpoB_gene-N1	rpoB:TCA->TTA	rpoB:S283L
Zamia furfuracea	27523	G	C->T	26	0	3	0	29	-	0.896552	CDS;gene	rpoB_CDS-N1;rpoB_gene-N1	rpoB:CCG->CTG	rpoB:P268L
Zamia furfuracea	27649	G	C->T	27	0	4	0	31	-	0.870968	CDS;gene	rpoB_CDS-N1;rpoB_gene-N1	rpoB:TCG->TTG	rpoB:S226L
Zamia furfuracea	27760	G	C->T	22	0	4	0	26	-	0.846154	CDS;gene	rpoB_CDS-N1;rpoB_gene-N1	rpoB:TCA->TTA	rpoB:S189L
Zamia furfuracea	27853	G	C->T	16	0	5	0	21	-	0.761905	CDS;gene	rpoB_CDS-N1;rpoB_gene-N1	rpoB:TCA->TTA	rpoB:S158L
Zamia furfuracea	28297	G	C->T	24	0	4	0	28	-	0.857143	CDS;gene	rpoB_CDS-N1;rpoB_gene-N1	rpoB:TCT->TTT	rpoB:S10F
Zamia furfuracea	29175	G	C->T	4	0	69	0	73	-	0.0547945	-	-	-	-
Zamia furfuracea	29526	G	C->T	34	0	44	0	78	-	0.435897	-	-	-	-
Zamia furfuracea	30516	G	C->T	31	0	311	0	342	-	0.0906433	-	-	-	-
Zamia furfuracea	30572	G	C->T	182	0	117	0	299	-	0.608696	-	-	-	-
Zamia furfuracea	30869	G	C->T	8	0	61	0	69	-	0.115942	-	-	-	-
Zamia furfuracea	32516	C	C->T	0	26	0	6	32	+	0.1875	-	-	-	-
Zamia furfuracea	32867	C	C->T	0	23	0	14	37	+	0.378378	-	-	-	-
Zamia furfuracea	33495	C	C->T	0	11	0	5	16	+	0.3125	-	-	-	-
Zamia furfuracea	38158	C	C->T	0	40	0	244	284	+	0.859155	CDS;gene	psbZ_CDS-N1;psbZ_gene-N1	psbZ:CAA->TAA	psbZ:Q63U
Zamia furfuracea	39027	G	C->T	439	0	14	0	453	-	0.969095	CDS;gene	rps14_CDS-N1;rps14_gene-N1	rps14:TCG->TTG	rps14:S50L
Zamia furfuracea	39660	G	C->T	328	0	1	0	329	-	0.99696	CDS;gene	psaB_CDS-N1;psaB_gene-N1	psaB:TCA->TTA	psaB:S620L
Zamia furfuracea	44247	G	C->T	20	0	104	0	124	-	0.16129	-	-	-	-
Zamia furfuracea	44491	G	C->T	94	0	13	0	107	-	0.878505	CDS;gene	ycf3_CDS-N3;ycf3_gene-N1	ycf3:TCC->TTC	ycf3:S136F
Zamia furfuracea	44690	G	C->T	5	0	87	0	92	-	0.0543478	gene;intron	ycf3_gene-N1;ycf3_intron-N2	-	-
Zamia furfuracea	45340	G	C->T	60	0	9	0	69	-	0.869565	CDS;gene	ycf3_CDS-N2;ycf3_gene-N1	ycf3:CAT->TAT	ycf3:H95Y
Zamia furfuracea	46317	G	C->T	79	0	1	0	80	-	0.9875	CDS;gene	ycf3_CDS-N1;ycf3_gene-N1	ycf3:ACT->ATT	ycf3:T11I
Zamia furfuracea	47894	G	C->T	55	0	4	0	59	-	0.932203	CDS;gene	rps4_CDS-N1;rps4_gene-N1	rps4:TCG->TTG	rps4:S91L
Zamia furfuracea	50207	G	C->T	7	0	105	0	112	-	0.0625	-	-	-	-
Zamia furfuracea	50225	G	C->T	22	0	103	0	125	-	0.176	-	-	-	-
Zamia furfuracea	50238	G	C->T	12	0	129	0	141	-	0.0851064	-	-	-	-
Zamia furfuracea	50408	G	C->T	9	0	141	0	150	-	0.06	-	-	-	-
Zamia furfuracea	50415	G	C->T	101	0	35	0	136	-	0.742647	-	-	-	-
Zamia furfuracea	50519	G	C->T	19	0	86	0	105	-	0.180952	-	-	-	-
Zamia furfuracea	51054	G	C->T	108	0	12	0	120	-	0.9	CDS;gene	ndhJ_CDS-N1;ndhJ_gene-N1	ndhJ:CGG->TGG	ndhJ:R51W
Zamia furfuracea	51220	G	C->T	9	0	147	0	156	-	0.0576923	-	-	-	-
Zamia furfuracea	51372	G	C->T	15	0	176	0	191	-	0.078534	CDS;gene	ndhK_CDS-N1;ndhK_gene-N1	ndhK:TCT->TTT	ndhK:S263F
Zamia furfuracea	51461	G	C->T	67	0	91	0	158	-	0.424051	CDS;gene	ndhK_CDS-N1;ndhK_gene-N1	ndhK:TTC->TTT	ndhK:F233F
Zamia furfuracea	51696	G	C->T	13	0	108	0	121	-	0.107438	CDS;gene	ndhK_CDS-N1;ndhK_gene-N1	ndhK:CCC->CTC	ndhK:P155L
Zamia furfuracea	51969	G	C->T	17	0	154	0	171	-	0.0994152	CDS;gene	ndhK_CDS-N1;ndhK_gene-N1	ndhK:TCA->TTA	ndhK:S64L
Zamia furfuracea	52079	G	C->T	133	0	19	0	152	-	0.875	CDS;gene	ndhC_CDS-N1;ndhC_gene-N1	ndhC:TCA->TTA	ndhC:S108L
Zamia furfuracea	52079	G	C->T	133	0	19	0	152	-	0.875	CDS;gene	ndhK_CDS-N1;ndhK_gene-N1	ndhK:TTC->TTT	ndhK:F27F
Zamia furfuracea	52091	G	C->T	134	0	18	0	152	-	0.881579	CDS;gene	ndhC_CDS-N1;ndhC_gene-N1	ndhC:CCA->CTA	ndhC:P104L
Zamia furfuracea	52091	G	C->T	134	0	18	0	152	-	0.881579	CDS;gene	ndhK_CDS-N1;ndhK_gene-N1	ndhK:CCC->CCT	ndhK:P23P
Zamia furfuracea	52427	G	C->T	9	0	163	0	172	-	0.0523256	-	-	-	-
Zamia furfuracea	52938	G	C->T	7	0	57	0	64	-	0.109375	-	-	-	-
Zamia furfuracea	57588	G	C->T	16	0	243	0	259	-	0.0617761	CDS;gene	atpB_CDS-N1;atpB_gene-N1	atpB:CCC->CCT	atpB:P468P
Zamia furfuracea	58407	G	C->T	4	0	13	0	17	+	0.235294	CDS;gene	atpB_CDS-N1;atpB_gene-N1	atpB:TCC->TCT	atpB:S195S
Zamia furfuracea	58546	G	C->T	9	0	140	0	149	-	0.0604027	CDS;gene	atpB_CDS-N1;atpB_gene-N1	atpB:ACA->ATA	atpB:T149I
Zamia furfuracea	59329	G	C->T	26	0	171	0	197	-	0.13198	-	-	-	-
Zamia furfuracea	61897	C	C->T	0	119	0	19	138	+	0.137681	-	-	-	-
Zamia furfuracea	62047	C	C->T	0	132	0	7	139	+	0.0503597	CDS;gene	accD_CDS-N1;accD_gene-N1	accD:GTC->GTT	accD:V49V
Zamia furfuracea	62060	C	C->T	0	3	0	123	126	+	0.97619	CDS;gene	accD_CDS-N1;accD_gene-N1	accD:CGT->TGT	accD:R54C
Zamia furfuracea	62155	C	C->T	0	104	0	52	156	+	0.333333	CDS;gene	accD_CDS-N1;accD_gene-N1	accD:ATC->ATT	accD:I85I
Zamia furfuracea	62163	C	C->T	0	3	0	154	157	+	0.980892	CDS;gene	accD_CDS-N1;accD_gene-N1	accD:TCA->TTA	accD:S88L
Zamia furfuracea	62180	C	C->T	0	1	0	167	168	+	0.994048	CDS;gene	accD_CDS-N1;accD_gene-N1	accD:CGG->TGG	accD:R94W
Zamia furfuracea	62211	C	C->T	0	3	0	158	161	+	0.981366	CDS;gene	accD_CDS-N1;accD_gene-N1	accD:CCA->CTA	accD:P104L
Zamia furfuracea	62319	C	C->T	0	4	0	132	136	+	0.970588	CDS;gene	accD_CDS-N1;accD_gene-N1	accD:CCA->CTA	accD:P140L
Zamia furfuracea	62688	C	C->T	0	8	0	215	223	+	0.964126	CDS;gene	accD_CDS-N1;accD_gene-N1	accD:TCA->TTA	accD:S263L
Zamia furfuracea	62745	C	C->T	0	3	0	199	202	+	0.985149	CDS;gene	accD_CDS-N1;accD_gene-N1	accD:TCA->TTA	accD:S282L
Zamia furfuracea	62910	C	C->T	0	186	0	16	202	+	0.0792079	CDS;gene	accD_CDS-N1;accD_gene-N1	accD:ACA->ATA	accD:T337I
Zamia furfuracea	62949	C	C->T	0	1	0	171	172	+	0.994186	-	-	-	-
Zamia furfuracea	63285	C	C->T	0	65	0	72	137	+	0.525547	-	-	-	-
Zamia furfuracea	63496	C	C->T	0	3	0	168	171	+	0.982456	CDS;gene	psaI_CDS-N1;psaI_gene-N1	psaI:GCG->GTG	psaI:A14V
Zamia furfuracea	63975	C	C->T	0	1	0	93	94	+	0.989362	CDS;gene	ycf4_CDS-N1;ycf4_gene-N1	ycf4:CGG->TGG	ycf4:R24W
Zamia furfuracea	64159	C	C->T	0	13	0	91	104	+	0.875	CDS;gene	ycf4_CDS-N1;ycf4_gene-N1	ycf4:TCG->TTG	ycf4:S85L
Zamia furfuracea	64656	C	C->T	0	101	0	8	109	+	0.0733945	-	-	-	-
Zamia furfuracea	65833	C	C->T	0	6	0	121	127	+	0.952756	CDS;gene	cemA_CDS-N1;cemA_gene-N1	cemA:CCA->CTA	cemA:P120L
Zamia furfuracea	65846	C	C->T	0	113	0	8	121	+	0.0661157	CDS;gene	cemA_CDS-N1;cemA_gene-N1	cemA:TTC->TTT	cemA:F124F
Zamia furfuracea	65908	C	C->T	0	38	0	70	108	+	0.648148	CDS;gene	cemA_CDS-N1;cemA_gene-N1	cemA:CCG->CTG	cemA:P145L
Zamia furfuracea	66026	C	C->T	0	101	0	6	107	+	0.0560748	CDS;gene	cemA_CDS-N1;cemA_gene-N1	cemA:TCC->TCT	cemA:S184S
Zamia furfuracea	66076	C	C->T	0	6	0	116	122	+	0.95082	CDS;gene	cemA_CDS-N1;cemA_gene-N1	cemA:CCA->CTA	cemA:P201L
Zamia furfuracea	66216	C	C->T	0	99	0	10	109	+	0.0917431	-	-	-	-
Zamia furfuracea	66514	C	C->T	0	158	0	9	167	+	0.0538922	CDS;gene	petA_CDS-N1;petA_gene-N1	petA:CCC->CCT	petA:P37P
Zamia furfuracea	66895	C	C->T	0	150	0	9	159	+	0.0566038	CDS;gene	petA_CDS-N1;petA_gene-N1	petA:CCC->CCT	petA:P164P
Zamia furfuracea	67126	C	C->T	0	58	0	221	279	+	0.792115	CDS;gene	petA_CDS-N1;petA_gene-N1	petA:ATC->ATT	petA:I241I
Zamia furfuracea	68070	G	C->T	5	0	6	0	11	-	0.454545	-	-	-	-
Zamia furfuracea	68131	C	C->T	0	34	0	7	41	+	0.170732	-	-	-	-
Zamia furfuracea	68488	G	C->T	74	0	253	0	327	-	0.2263	CDS;gene	psbL_CDS-N1;psbL_gene-N1	psbL:TTC->TTT	psbL:F37F
Zamia furfuracea	68492	G	C->T	323	0	8	0	331	-	0.975831	CDS;gene	psbL_CDS-N1;psbL_gene-N1	psbL:TCT->TTT	psbL:S36F
Zamia furfuracea	68788	G	C->T	292	0	16	0	308	-	0.948052	CDS;gene	psbE_CDS-N1;psbE_gene-N1	psbE:CCG->TCG	psbE:P72S
Zamia furfuracea	68792	G	C->T	16	0	302	0	318	-	0.0503145	CDS;gene	psbE_CDS-N1;psbE_gene-N1	psbE:TCC->TTT	psbE:S70F
Zamia furfuracea	68793	G	C->T	309	0	9	0	318	-	0.971698	CDS;gene	psbE_CDS-N1;psbE_gene-N1	psbE:TCC->TTT	psbE:S70F
Zamia furfuracea	69699	G	C->T	29	0	14	0	43	-	0.674419	-	-	-	-
Zamia furfuracea	69810	G	C->T	6	0	66	0	72	-	0.0833333	-	-	-	-
Zamia furfuracea	70297	C	C->T	0	142	0	46	188	+	0.244681	CDS;gene	petL_CDS-N1;petL_gene-N1	petL:ACG->ATG	petL:T1M
Zamia furfuracea	70319	C	C->T	0	185	0	11	196	+	0.0561224	CDS;gene	petL_CDS-N1;petL_gene-N1	petL:TTC->TTT	petL:F8F
Zamia furfuracea	70563	C	C->T	0	78	0	151	229	+	0.659389	CDS;gene	petG_CDS-N1;petG_gene-N1	petG:CCA->CTA	petG:P6L
Zamia furfuracea	70861	C	C->T	0	48	0	152	200	+	0.76	-	-	-	-
Zamia furfuracea	71373	C	C->T	0	169	0	27	196	+	0.137755	-	-	-	-
Zamia furfuracea	72013	C	C->T	0	12	0	171	183	+	0.934426	CDS;gene	rpl33_CDS-N1;rpl33_gene-N1	rpl33:CCG->CTG	rpl33:P46L
Zamia furfuracea	72381	C	C->T	0	6	0	300	306	+	0.980392	CDS;gene	rps18_CDS-N1;rps18_gene-N1	rps18:TCA->TTA	rps18:S28L
Zamia furfuracea	72498	C	C->T	0	18	0	373	391	+	0.953964	CDS;gene	rps18_CDS-N1;rps18_gene-N1	rps18:TCG->TTG	rps18:S67L
Zamia furfuracea	72501	C	C->T	0	16	0	357	373	+	0.957105	CDS;gene	rps18_CDS-N1;rps18_gene-N1	rps18:TCA->TTA	rps18:S68L
Zamia furfuracea	72819	G	C->T	123	0	5	0	128	-	0.960938	CDS;gene	rpl20_CDS-N1;rpl20_gene-N1	rpl20:TCA->TTA	rpl20:S90L
Zamia furfuracea	73875	G	C->T	298	0	152	0	450	-	0.662222	CDS;gene	rps12_CDS-N1;rps12_gene-N1	rps12:CTC->CTT	rps12:P7L
Zamia furfuracea	74042	G	C->T	258	0	209	0	467	-	0.552463	CDS;gene	clpP_CDS-N3;clpP_gene-N1	clpP:CTC->CTT	clpP:L194L
Zamia furfuracea	74899	G	C->T	177	0	103	0	280	-	0.632143	CDS;gene	clpP_CDS-N2;clpP_gene-N1	clpP:TCT->TTT	clpP:S98F
Zamia furfuracea	75109	G	C->T	329	0	41	0	370	-	0.889189	CDS;gene	clpP_CDS-N2;clpP_gene-N1	clpP:CCG->CTG	clpP:P28L
Zamia furfuracea	76384	C	C->T	0	180	0	12	192	+	0.0625	-	-	-	-
Zamia furfuracea	76429	C	C->T	0	283	0	26	309	+	0.0841424	-	-	-	-
Zamia furfuracea	77890	C	C->T	0	96	0	162	258	+	0.627907	CDS;gene	psbB_CDS-N1;psbB_gene-N1	psbB:TTC->TTT	psbB:F464F
Zamia furfuracea	78463	G	C->T	6	0	4	0	10	-	0.6	CDS;gene	psbN_CDS-N1;psbN_gene-N1	psbN:CGT->TGT	psbN:R13C
Zamia furfuracea	78755	C	C->T	0	5	0	208	213	+	0.976526	CDS;gene	psbH_CDS-N1;psbH_gene-N1	psbH:CCG->CTG	psbH:P58L
Zamia furfuracea	79108	C	C->T	0	129	0	11	140	+	0.0785714	gene;intron	petB_gene-N1;petB_intron-N1	-	-
Zamia furfuracea	79493	C	C->T	0	170	0	10	180	+	0.0555556	gene;intron	petB_gene-N1;petB_intron-N1	-	-
Zamia furfuracea	79494	C	C->T	0	171	0	14	185	+	0.0756757	gene;intron	petB_gene-N1;petB_intron-N1	-	-
Zamia furfuracea	80769	C	C->T	0	140	0	11	151	+	0.0728477	gene;intron	petD_gene-N1;petD_intron-N1	-	-
Zamia furfuracea	81414	C	C->T	0	3	0	168	171	+	0.982456	CDS;gene	petD_CDS-N2;petD_gene-N1	petD:TCT->TTT	petD:S40F
Zamia furfuracea	81776	C	C->T	0	10	0	184	194	+	0.948454	CDS;gene	petD_CDS-N2;petD_gene-N1	petD:CAA->TAA	petD:Q161U
Zamia furfuracea	81922	G	C->T	17	0	42	0	59	-	0.288136	-	-	-	-
Zamia furfuracea	81935	G	C->T	29	0	61	0	90	-	0.322222	-	-	-	-
Zamia furfuracea	81936	G	C->T	68	0	22	0	90	-	0.755556	-	-	-	-
Zamia furfuracea	82016	G	C->T	164	0	11	0	175	-	0.937143	CDS;gene	rpoA_CDS-N1;rpoA_gene-N1	rpoA:CAG->TAG	rpoA:Q339U
Zamia furfuracea	82221	G	C->T	8	0	112	0	120	-	0.0666667	CDS;gene	rpoA_CDS-N1;rpoA_gene-N1	rpoA:TTC->TTT	rpoA:F270F
Zamia furfuracea	82425	G	C->T	10	0	147	0	157	-	0.0636943	CDS;gene	rpoA_CDS-N1;rpoA_gene-N1	rpoA:CTC->CTT	rpoA:L202L
Zamia furfuracea	82575	G	C->T	8	0	102	0	110	-	0.0727273	CDS;gene	rpoA_CDS-N1;rpoA_gene-N1	rpoA:ATC->ATT	rpoA:I152I
Zamia furfuracea	82625	G	C->T	7	0	118	0	125	-	0.056	CDS;gene	rpoA_CDS-N1;rpoA_gene-N1	rpoA:CAT->TAT	rpoA:H136Y
Zamia furfuracea	82729	G	C->T	103	0	15	0	118	-	0.872881	CDS;gene	rpoA_CDS-N1;rpoA_gene-N1	rpoA:CCG->CTG	rpoA:P101L
Zamia furfuracea	82765	G	C->T	69	0	24	0	93	-	0.741935	CDS;gene	rpoA_CDS-N1;rpoA_gene-N1	rpoA:TCA->TTA	rpoA:S89L
Zamia furfuracea	83638	G	C->T	109	0	5	0	114	-	0.95614	CDS;gene	rpl36_CDS-N1;rpl36_gene-N1	rpl36:CGT->TGT	rpl36:R11C
Zamia furfuracea	83736	G	C->T	11	0	108	0	119	-	0.092437	-	-	-	-
Zamia furfuracea	83931	G	C->T	148	0	0	0	148	-	1	CDS;gene	infA_CDS-N1;infA_gene-N1	infA:CCA->CTA	infA:P33L
Zamia furfuracea	84136	G	C->T	14	0	197	0	211	-	0.0663507	-	-	-	-
Zamia furfuracea	84217	G	C->T	110	0	69	0	179	-	0.614525	CDS;gene	rps8_CDS-N1;rps8_gene-N1	rps8:ATC->ATT	rps8:I112I
Zamia furfuracea	84314	G	C->T	129	0	8	0	137	-	0.941606	CDS;gene	rps8_CDS-N1;rps8_gene-N1	rps8:ACT->ATT	rps8:T80I
Zamia furfuracea	84323	G	C->T	131	0	6	0	137	-	0.956204	CDS;gene	rps8_CDS-N1;rps8_gene-N1	rps8:TCA->TTA	rps8:S77L
Zamia furfuracea	84365	G	C->T	135	0	2	0	137	-	0.985401	CDS;gene	rps8_CDS-N1;rps8_gene-N1	rps8:TCA->TTA	rps8:S63L
Zamia furfuracea	84367	G	C->T	10	0	132	0	142	-	0.0704225	CDS;gene	rps8_CDS-N1;rps8_gene-N1	rps8:ACC->ACT	rps8:T62T
Zamia furfuracea	84508	G	C->T	16	0	107	0	123	-	0.130081	CDS;gene	rps8_CDS-N1;rps8_gene-N1	rps8:AAC->AAT	rps8:N15N
Zamia furfuracea	85489	G	C->T	8	0	129	0	137	-	0.0583942	CDS;gene	rpl16_CDS-N2;rpl16_gene-N1	rpl16:TTC->TTT	rpl16:F33F
Zamia furfuracea	85853	G	C->T	97	0	88	0	185	-	0.524324	gene;intron	rpl16_gene-N1;rpl16_intron-N1	-	-
Zamia furfuracea	86362	G	C->T	174	0	27	1	202	-	0.861386	gene;intron	rpl16_gene-N1;rpl16_intron-N1	-	-
Zamia furfuracea	87178	G	C->T	11	0	186	0	197	-	0.0558376	CDS;gene	rps3_CDS-N1;rps3_gene-N1	rps3:TCC->TCT	rps3:S30S
Zamia furfuracea	87497	G	C->T	146	0	3	0	149	-	0.979866	CDS;gene	rpl22_CDS-N1;rpl22_gene-N1	rpl22:CCT->TCT	rpl22:P59S
Zamia furfuracea	87946	G	C->T	112	0	56	0	168	-	0.666667	CDS;gene	rps19_CDS-N1;rps19_gene-N1	rps19:TCG->TTG	rps19:S16L
Zamia furfuracea	88361	G	C->T	87	0	42	0	129	-	0.674419	CDS;gene	rpl2_CDS-N2;rpl2_gene-N1	rpl2:TCG->TTG	rpl2:S172L
Zamia furfuracea	89195	G	C->T	39	0	14	0	53	-	0.735849	CDS;gene	rpl2_CDS-N1;rpl2_gene-N1	rpl2:CCA->CTA	rpl2:P131L
Zamia furfuracea	89305	G	C->T	95	0	9	0	104	-	0.913462	CDS;gene	rpl2_CDS-N1;rpl2_gene-N1	rpl2:CTC->CTT	rpl2:L94L
Zamia furfuracea	89406	G	C->T	12	0	91	0	103	-	0.116505	CDS;gene	rpl2_CDS-N1;rpl2_gene-N1	rpl2:CGT->TGT	rpl2:R61C
Zamia furfuracea	113059	G	G->A	3516	6	6215	10	9747	+	0.360726	gene;RNA	rrn23_gene-N1;rrn23_rna-N1	-	-
Zamia furfuracea	117050	G	C->T	24	0	6	0	30	-	0.8	CDS;gene	ndhF_CDS-N1;ndhF_gene-N1	ndhF:CCG->CTG	ndhF:P346L
Zamia furfuracea	117383	G	C->T	35	0	5	0	40	-	0.875	CDS;gene	ndhF_CDS-N1;ndhF_gene-N1	ndhF:TCA->TTA	ndhF:S235L
Zamia furfuracea	117452	G	C->T	27	0	3	0	30	-	0.9	CDS;gene	ndhF_CDS-N1;ndhF_gene-N1	ndhF:TCT->TTT	ndhF:S212F
Zamia furfuracea	117839	G	C->T	23	0	8	0	31	-	0.741935	CDS;gene	ndhF_CDS-N1;ndhF_gene-N1	ndhF:TCA->TTA	ndhF:S83L
Zamia furfuracea	117975	G	C->T	3	0	36	0	39	-	0.0769231	CDS;gene	ndhF_CDS-N1;ndhF_gene-N1	ndhF:CAT->TAT	ndhF:H38Y
Zamia furfuracea	118108	G	C->T	14	0	10	0	24	-	0.583333	-	-	-	-
Zamia furfuracea	119674	C	C->T	0	13	0	10	23	+	0.434783	-	-	-	-
Zamia furfuracea	121538	C	C->T	0	11	0	57	68	+	0.838235	CDS;gene	ccsA_CDS-N1;ccsA_gene-N1	ccsA:TCA->TTA	ccsA:S115L
Zamia furfuracea	121688	C	C->T	0	45	0	14	59	+	0.237288	CDS;gene	ccsA_CDS-N1;ccsA_gene-N1	ccsA:TCT->TTT	ccsA:S165F
Zamia furfuracea	121957	C	C->T	0	7	0	55	62	+	0.887097	CDS;gene	ccsA_CDS-N1;ccsA_gene-N1	ccsA:CAT->TAT	ccsA:H255Y
Zamia furfuracea	122084	C	C->T	0	10	0	87	97	+	0.896907	CDS;gene	ccsA_CDS-N1;ccsA_gene-N1	ccsA:TCC->TTT	ccsA:S297F
Zamia furfuracea	122085	C	C->T	0	68	0	27	95	+	0.284211	CDS;gene	ccsA_CDS-N1;ccsA_gene-N1	ccsA:TCC->TTT	ccsA:S297F
Zamia furfuracea	122545	G	C->T	17	0	0	0	17	-	1	CDS;gene	ndhD_CDS-N1;ndhD_gene-N1	ndhD:CCT->CTT	ndhD:P477L
Zamia furfuracea	122551	G	C->T	16	0	2	0	18	-	0.888889	CDS;gene	ndhD_CDS-N1;ndhD_gene-N1	ndhD:GCT->GTT	ndhD:A475V
Zamia furfuracea	122581	G	C->T	20	0	1	0	21	-	0.952381	CDS;gene	ndhD_CDS-N1;ndhD_gene-N1	ndhD:TCA->TTA	ndhD:S465L
Zamia furfuracea	122681	G	C->T	12	0	1	0	13	-	0.923077	CDS;gene	ndhD_CDS-N1;ndhD_gene-N1	ndhD:CAT->TAT	ndhD:H432Y
Zamia furfuracea	122782	G	C->T	18	0	2	0	20	-	0.9	CDS;gene	ndhD_CDS-N1;ndhD_gene-N1	ndhD:TCT->TTT	ndhD:S398F
Zamia furfuracea	122932	G	C->T	29	0	3	0	32	-	0.90625	CDS;gene	ndhD_CDS-N1;ndhD_gene-N1	ndhD:TCG->TTG	ndhD:S348L
Zamia furfuracea	122951	C	G->A	0	21	0	42	63	+	0.666667	CDS;gene	ndhD_CDS-N1;ndhD_gene-N1	ndhD:GGT->AGT	ndhD:G342S
Zamia furfuracea	123197	C	G->A	0	29	0	4	33	+	0.121212	CDS;gene	ndhD_CDS-N1;ndhD_gene-N2	ndhD:GGA->AGA	ndhD:G260R
Zamia furfuracea	123439	G	C->T	7	0	7	0	14	-	0.5	CDS;gene	ndhD_CDS-N1;ndhD_gene-N1	ndhD:TCA->TTA	ndhD:S179L
Zamia furfuracea	123580	C	G->A	0	20	0	4	24	+	0.166667	CDS;gene	ndhD_CDS-N1;ndhD_gene-N1	ndhD:CGA->CAA	ndhD:R132Q
Zamia furfuracea	124933	G	C->T	132	0	5	0	137	-	0.963504	CDS;gene	ndhE_CDS-N1;ndhE_gene-N1	ndhE:ACC->ATC	ndhE:T66I
Zamia furfuracea	125107	G	C->T	48	0	98	0	146	-	0.328767	CDS;gene	ndhE_CDS-N1;ndhE_gene-N1	ndhE:TCA->TTA	ndhE:S8L
Zamia furfuracea	125478	G	C->T	120	0	1	0	121	-	0.991736	CDS;gene	ndhG_CDS-N1;ndhG_gene-N1	ndhG:CCG->CTG	ndhG:P116L
Zamia furfuracea	125645	G	C->T	9	0	65	0	74	-	0.121622	CDS;gene	ndhG_CDS-N1;ndhG_gene-N1	ndhG:GCC->GCT	ndhG:A60A
Zamia furfuracea	125703	G	C->T	59	0	2	0	61	-	0.967213	CDS;gene	ndhG_CDS-N1;ndhG_gene-N1	ndhG:CCG->CTG	ndhG:P41L
Zamia furfuracea	126434	G	C->T	79	0	5	0	84	-	0.940476	CDS;gene	ndhI_CDS-N1;ndhI_gene-N1	ndhI:CAT->TAT	ndhI:H97Y
Zamia furfuracea	126524	G	C->T	82	0	5	0	87	-	0.942529	CDS;gene	ndhI_CDS-N1;ndhI_gene-N1	ndhI:CGT->TGT	ndhI:R67C
Zamia furfuracea	126945	G	C->T	91	0	4	0	95	-	0.957895	CDS;gene	ndhA_CDS-N2;ndhA_gene-N1	ndhA:CGG->TGG	ndhA:R346W
Zamia furfuracea	127409	G	C->T	68	0	8	0	76	-	0.894737	CDS;gene	ndhA_CDS-N2;ndhA_gene-N1	ndhA:TCA->TTA	ndhA:S191L
Zamia furfuracea	127583	G	C->T	10	0	75	0	85	-	0.117647	gene;intron	ndhA_gene-N1;ndhA_intron-N1	-	-
Zamia furfuracea	127606	G	C->T	20	0	51	0	71	-	0.28169	gene;intron	ndhA_gene-N1;ndhA_intron-N1	-	-
Zamia furfuracea	128497	G	C->T	72	0	1	0	73	-	0.986301	CDS;gene	ndhA_CDS-N1;ndhA_gene-N1	ndhA:TCA->TTA	ndhA:S161L
Zamia furfuracea	128641	G	C->T	57	0	8	0	65	-	0.876923	CDS;gene	ndhA_CDS-N1;ndhA_gene-N1	ndhA:TCG->TTG	ndhA:S113L
Zamia furfuracea	128962	G	C->T	115	0	19	0	134	-	0.858209	CDS;gene	ndhA_CDS-N1;ndhA_gene-N1	ndhA:ACG->ATG	ndhA:T6M
Zamia furfuracea	129199	G	C->T	31	0	0	0	31	-	1	CDS;gene	ndhH_CDS-N1;ndhH_gene-N1	ndhH:TCA->TTA	ndhH:S321L
Zamia furfuracea	129327	G	C->T	35	0	8	0	43	-	0.813953	CDS;gene	ndhH_CDS-N1;ndhH_gene-N1	ndhH:GCC->GCT	ndhH:A278A
Zamia furfuracea	129757	G	C->T	21	0	6	0	27	-	0.777778	CDS;gene	ndhH_CDS-N1;ndhH_gene-N1	ndhH:TCC->TTC	ndhH:S135F
Zamia furfuracea	129858	G	C->T	5	0	29	0	34	-	0.147059	CDS;gene	ndhH_CDS-N1;ndhH_gene-N1	ndhH:ATC->ATT	ndhH:I101I
Zamia furfuracea	130525	G	C->T	3	0	43	0	46	-	0.0652174	CDS;gene	rps15_CDS-N1;rps15_gene-N1	rps15:CCC->CCT	rps15:P6P
Zamia furfuracea	130632	G	C->T	3	0	51	0	54	-	0.0555556	-	-	-	-
Zamia furfuracea	130814	G	C->T	3	0	22	0	25	-	0.12	-	-	-	-
Zamia furfuracea	130943	G	C->T	3	0	46	0	49	-	0.0612245	-	-	-	-
Zamia furfuracea	131728	G	C->T	4	0	50	0	54	-	0.0740741	CDS;gene	ycf1_CDS-N1;ycf1_gene-N1	ycf1:TCG->TTG	ycf1:S1440L
Zamia furfuracea	132415	C	G->A	0	36	0	5	41	-	0.121951	CDS;gene	ycf1_CDS-N1;ycf1_gene-N1	ycf1:TGC->TAC	ycf1:C1211Y
Zamia furfuracea	132800	G	C->T	4	0	42	0	46	-	0.0869565	CDS;gene	ycf1_CDS-N1;ycf1_gene-N1	ycf1:CTC->TTC	ycf1:L1083F
Zamia furfuracea	133675	G	C->T	31	0	1	0	32	-	0.96875	CDS;gene	ycf1_CDS-N1;ycf1_gene-N1	ycf1:TCT->TTT	ycf1:S791F
Zamia furfuracea	135039	G	C->T	5	0	24	0	29	-	0.172414	CDS;gene	ycf1_CDS-N1;ycf1_gene-N1	ycf1:ACC->ACT	ycf1:T336T
Zamia furfuracea	135393	G	C->T	4	0	12	0	16	-	0.25	CDS;gene	ycf1_CDS-N1;ycf1_gene-N1	ycf1:TTC->TTT	ycf1:F218F
Zamia furfuracea	135509	G	C->T	8	0	13	0	21	-	0.380952	CDS;gene	ycf1_CDS-N1;ycf1_gene-N1	ycf1:CTA->TTA	ycf1:L180L
Zamia furfuracea	136459	G	C->T	121	0	12	0	133	-	0.909774	CDS;gene	chlN_CDS-N1;chlN_gene-N1	chlN:ACT->ATT	chlN:T419I
Zamia furfuracea	136862	G	C->T	113	0	13	0	126	-	0.896825	CDS;gene	chlN_CDS-N1;chlN_gene-N1	chlN:CCT->TCT	chlN:P285S
Zamia furfuracea	137080	G	C->T	103	0	31	0	134	-	0.768657	CDS;gene	chlN_CDS-N1;chlN_gene-N1	chlN:TCG->TTG	chlN:S212L
Zamia furfuracea	137287	G	C->T	93	0	38	0	131	-	0.709924	CDS;gene	chlN_CDS-N1;chlN_gene-N1	chlN:TCT->TTT	chlN:S143F
Zamia furfuracea	137421	G	C->T	69	0	55	0	124	-	0.556452	CDS;gene	chlN_CDS-N1;chlN_gene-N1	chlN:CCC->CCT	chlN:P98P
Zamia furfuracea	137483	G	C->T	6	0	105	0	111	-	0.0540541	CDS;gene	chlN_CDS-N1;chlN_gene-N1	chlN:CAA->TAA	chlN:Q78U
Zamia furfuracea	137488	G	C->T	10	0	104	0	114	-	0.0877193	CDS;gene	chlN_CDS-N1;chlN_gene-N1	chlN:TCG->TTG	chlN:S76L
Zamia furfuracea	137564	G	C->T	78	0	72	0	150	-	0.52	CDS;gene	chlN_CDS-N1;chlN_gene-N1	chlN:CTA->TTA	chlN:L51L
Zamia furfuracea	138729	G	C->T	4	0	35	0	39	-	0.102564	-	-	-	-
Zamia furfuracea	141851	C	G->A	22	7262	7	3365	10656	-	0.316646	gene;RNA	rrn23_gene-N2;rrn23_rna-N2	-	-

## Sheet: Ginkgo biloba
Species	Coordinate	Gbase	EditType	Ginkgo.RNA_baseCount A	C	G	T	total	Strand	frequency	TargetedGenomicFeature	TargetedFeatureID	CodonChange	AminoAcidChange
Ginkgo biloba	598	G	C->T	68	0	88	0	156	-	0.435897	CDS;gene	psbA_CDS-N1;psbA_gene-N1	psbA:TCC->TCT	psbA:S268S
Ginkgo biloba	607	G	C->T	34	0	150	0	184	-	0.184783	CDS;gene	psbA_CDS-N1;psbA_gene-N1	psbA:TTC->TTT	psbA:F265F
Ginkgo biloba	2231	G	C->T	29	0	17	0	46	-	0.630435	CDS;gene	matK_CDS-N1;matK_gene-N1	matK:TCA->TTA	matK:S486L
Ginkgo biloba	2231	G	C->T	29	0	17	0	46	-	0.630435	gene;intron	trnK-UUU_gene-N1;trnK-UUU_intron-N1	-	-
Ginkgo biloba	2391	G	C->T	20	0	16	0	36	-	0.555556	CDS;gene	matK_CDS-N1;matK_gene-N1	matK:CCA->TCA	matK:P433S
Ginkgo biloba	2391	G	C->T	20	0	16	0	36	-	0.555556	gene;intron	trnK-UUU_gene-N1;trnK-UUU_intron-N1	-	-
Ginkgo biloba	2420	G	C->T	13	0	20	0	33	-	0.393939	CDS;gene	matK_CDS-N1;matK_gene-N1	matK:TCA->TTA	matK:S423L
Ginkgo biloba	2420	G	C->T	13	0	20	0	33	-	0.393939	gene;intron	trnK-UUU_gene-N1;trnK-UUU_intron-N1	-	-
Ginkgo biloba	2711	G	C->T	6	0	29	0	35	-	0.171429	CDS;gene	matK_CDS-N1;matK_gene-N1	matK:TCT->TTT	matK:S326F
Ginkgo biloba	2711	G	C->T	6	0	29	0	35	-	0.171429	gene;intron	trnK-UUU_gene-N1;trnK-UUU_intron-N1	-	-
Ginkgo biloba	3015	G	C->T	3	0	24	0	27	-	0.111111	CDS;gene	matK_CDS-N1;matK_gene-N1	matK:CGG->TGG	matK:R225W
Ginkgo biloba	3015	G	C->T	3	0	24	0	27	-	0.111111	gene;intron	trnK-UUU_gene-N1;trnK-UUU_intron-N1	-	-
Ginkgo biloba	3158	G	C->T	9	0	8	0	17	-	0.529412	CDS;gene	matK_CDS-N1;matK_gene-N1	matK:TCA->TTA	matK:S177L
Ginkgo biloba	3158	G	C->T	9	0	8	0	17	-	0.529412	gene;intron	trnK-UUU_gene-N1;trnK-UUU_intron-N1	-	-
Ginkgo biloba	3248	G	C->T	19	0	20	0	39	-	0.487179	CDS;gene	matK_CDS-N1;matK_gene-N1	matK:TCG->TTG	matK:S147L
Ginkgo biloba	3248	G	C->T	19	0	20	0	39	-	0.487179	gene;intron	trnK-UUU_gene-N1;trnK-UUU_intron-N1	-	-
Ginkgo biloba	3261	G	C->T	15	0	24	0	39	-	0.384615	CDS;gene	matK_CDS-N1;matK_gene-N1	matK:CCC->TCC	matK:P143S
Ginkgo biloba	3261	G	C->T	15	0	24	0	39	-	0.384615	gene;intron	trnK-UUU_gene-N1;trnK-UUU_intron-N1	-	-
Ginkgo biloba	3386	G	C->T	12	0	10	0	22	-	0.545455	CDS;gene	matK_CDS-N1;matK_gene-N1	matK:CCG->CTG	matK:P101L
Ginkgo biloba	3386	G	C->T	12	0	10	0	22	-	0.545455	gene;intron	trnK-UUU_gene-N1;trnK-UUU_intron-N1	-	-
Ginkgo biloba	5152	G	C->T	8	0	5	0	13	-	0.615385	-	-	-	-
Ginkgo biloba	5172	G	C->T	16	0	3	0	19	-	0.842105	-	-	-	-
Ginkgo biloba	5215	G	C->T	4	0	20	0	24	-	0.166667	-	-	-	-
Ginkgo biloba	5244	G	C->T	22	0	2	0	24	-	0.916667	CDS;gene	rps16_CDS-N2;rps16_gene-N1	rps16:TCG->TTG	rps16:S70L
Ginkgo biloba	5757	G	C->T	25	0	0	0	25	-	1	gene;intron	rps16_gene-N1;rps16_intron-N1	-	-
Ginkgo biloba	5827	G	C->T	17	0	10	0	27	-	0.62963	gene;intron	rps16_gene-N1;rps16_intron-N1	-	-
Ginkgo biloba	6620	G	C->T	12	0	4	0	16	-	0.75	CDS;gene	chlB_CDS-N1;chlB_gene-N1	chlB:TCA->TTA	chlB:S456L
Ginkgo biloba	6710	G	C->T	12	0	0	0	12	-	1	CDS;gene	chlB_CDS-N1;chlB_gene-N1	chlB:CCA->CTA	chlB:P426L
Ginkgo biloba	6804	G	C->T	6	0	1	0	7	-	0.857143	CDS;gene	chlB_CDS-N1;chlB_gene-N1	chlB:CGT->TGT	chlB:R395C
Ginkgo biloba	7016	G	C->T	10	0	2	0	12	-	0.833333	CDS;gene	chlB_CDS-N1;chlB_gene-N1	chlB:CCT->CTT	chlB:P324L
Ginkgo biloba	7490	G	C->T	21	0	3	0	24	-	0.875	CDS;gene	chlB_CDS-N1;chlB_gene-N1	chlB:GCA->GTA	chlB:A166V
Ginkgo biloba	7919	G	C->T	9	0	1	0	10	-	0.9	CDS;gene	chlB_CDS-N1;chlB_gene-N1	chlB:TCC->TTC	chlB:S23F
Ginkgo biloba	7974	G	C->T	9	0	1	0	10	-	0.9	CDS;gene	chlB_CDS-N1;chlB_gene-N1	chlB:CAT->TAT	chlB:H5Y
Ginkgo biloba	8744	C	C->T	0	1	0	70	71	+	0.985915	CDS;gene	psbK_CDS-N1;psbK_gene-N1	psbK:TCC->TTC	psbK:S30F
Ginkgo biloba	9545	C	C->T	0	79	0	6	85	+	0.0705882	-	-	-	-
Ginkgo biloba	9653	C	C->T	0	2	0	63	65	+	0.969231	CDS;gene	psbI_CDS-N1;psbI_gene-N1	psbI:CAC->TAC	psbI:H9Y
Ginkgo biloba	9683	C	C->T	0	8	0	81	89	+	0.910112	CDS;gene	psbI_CDS-N1;psbI_gene-N1	psbI:CTT->TTT	psbI:L19F
Ginkgo biloba	10228	G	C->T	18	0	11	0	29	-	0.62069	-	-	-	-
Ginkgo biloba	10258	G	C->T	24	0	8	0	32	-	0.75	-	-	-	-
Ginkgo biloba	10314	C	C->T	0	32	0	8	40	+	0.2	-	-	-	-
Ginkgo biloba	11157	C	C->T	0	208	0	28	236	+	0.118644	gene;intron	trnG-GCC_gene-N1;trnG-GCC_intron-N1	-	-
Ginkgo biloba	12371	G	C->T	30	0	270	0	300	-	0.1	CDS;gene	atpA_CDS-N1;atpA_gene-N1	atpA:CGC->CGT	atpA:R462R
Ginkgo biloba	12411	G	C->T	191	0	18	0	209	-	0.913876	CDS;gene	atpA_CDS-N1;atpA_gene-N1	atpA:TCA->TTA	atpA:S449L
Ginkgo biloba	12494	G	C->T	12	0	210	0	222	-	0.0540541	CDS;gene	atpA_CDS-N1;atpA_gene-N1	atpA:CTC->CTT	atpA:L421L
Ginkgo biloba	12966	G	C->T	133	0	9	0	142	-	0.93662	CDS;gene	atpA_CDS-N1;atpA_gene-N1	atpA:CCC->CTC	atpA:P264L
Ginkgo biloba	12984	G	C->T	161	0	1	0	162	-	0.993827	CDS;gene	atpA_CDS-N1;atpA_gene-N1	atpA:CCA->CTA	atpA:P258L
Ginkgo biloba	13119	G	C->T	122	0	2	0	124	-	0.983871	CDS;gene	atpA_CDS-N1;atpA_gene-N1	atpA:TCC->TTC	atpA:S213F
Ginkgo biloba	13563	G	C->T	129	0	4	0	133	-	0.969925	CDS;gene	atpA_CDS-N1;atpA_gene-N1	atpA:CCA->CTA	atpA:P65L
Ginkgo biloba	13985	G	C->T	186	0	3	0	189	-	0.984127	CDS;gene	atpF_CDS-N2;atpF_gene-N1	atpF:CCT->TCT	atpF:P129S
Ginkgo biloba	14022	G	C->T	13	0	154	0	167	-	0.0778443	CDS;gene	atpF_CDS-N2;atpF_gene-N1	atpF:ATC->ATT	atpF:I116I
Ginkgo biloba	15139	G	C->T	68	0	55	0	123	-	0.552846	-	-	-	-
Ginkgo biloba	16889	G	C->T	27	0	2	0	29	-	0.931034	CDS;gene	atpI_CDS-N1;atpI_gene-N1	atpI:GCT->GTT	atpI:A139V
Ginkgo biloba	16986	G	C->T	37	0	1	0	38	-	0.973684	CDS;gene	atpI_CDS-N1;atpI_gene-N1	atpI:CTT->TTT	atpI:L107F
Ginkgo biloba	17156	G	C->T	30	0	0	0	30	-	1	CDS;gene	atpI_CDS-N1;atpI_gene-N1	atpI:TCA->TTA	atpI:S50L
Ginkgo biloba	17507	G	C->T	3	0	9	0	12	-	0.25	-	-	-	-
Ginkgo biloba	17818	G	C->T	9	0	0	0	9	-	1	CDS;gene	rps2_CDS-N1;rps2_gene-N1	rps2:CCA->CTA	rps2:P152L
Ginkgo biloba	17875	G	C->T	14	0	0	0	14	-	1	CDS;gene	rps2_CDS-N1;rps2_gene-N1	rps2:CCT->CTT	rps2:P133L
Ginkgo biloba	17929	G	C->T	17	0	0	0	17	-	1	CDS;gene	rps2_CDS-N1;rps2_gene-N1	rps2:CCT->CTT	rps2:P115L
Ginkgo biloba	18058	G	C->T	11	0	1	0	12	-	0.916667	CDS;gene	rps2_CDS-N1;rps2_gene-N1	rps2:CCA->CTA	rps2:P72L
Ginkgo biloba	18166	G	C->T	6	0	0	0	6	-	1	CDS;gene	rps2_CDS-N1;rps2_gene-N1	rps2:TCT->TTT	rps2:S36F
Ginkgo biloba	18889	G	C->T	11	0	0	0	11	-	1	CDS;gene	rpoC2_CDS-N1;rpoC2_gene-N1	rpoC2:TCA->TTA	rpoC2:S1224L
Ginkgo biloba	19162	G	C->T	8	0	0	0	8	-	1	CDS;gene	rpoC2_CDS-N1;rpoC2_gene-N1	rpoC2:TCA->TTA	rpoC2:S1133L
Ginkgo biloba	19195	G	C->T	9	0	0	0	9	-	1	CDS;gene	rpoC2_CDS-N1;rpoC2_gene-N1	rpoC2:ACA->ATA	rpoC2:T1122I
Ginkgo biloba	19203	G	C->T	7	0	4	0	11	-	0.636364	CDS;gene	rpoC2_CDS-N1;rpoC2_gene-N1	rpoC2:TCC->TCT	rpoC2:S1119S
Ginkgo biloba	19210	G	C->T	10	0	0	0	10	-	1	CDS;gene	rpoC2_CDS-N1;rpoC2_gene-N1	rpoC2:TCC->TTC	rpoC2:S1117F
Ginkgo biloba	20068	G	C->T	7	0	1	0	8	-	0.875	CDS;gene	rpoC2_CDS-N1;rpoC2_gene-N1	rpoC2:TCG->TTG	rpoC2:S831L
Ginkgo biloba	20251	G	C->T	6	0	0	0	6	-	1	CDS;gene	rpoC2_CDS-N1;rpoC2_gene-N1	rpoC2:CCG->CTG	rpoC2:P770L
Ginkgo biloba	20779	G	C->T	8	0	3	0	11	-	0.727273	CDS;gene	rpoC2_CDS-N1;rpoC2_gene-N1	rpoC2:TCT->TTT	rpoC2:S594F
Ginkgo biloba	21418	G	C->T	9	0	3	0	12	-	0.75	CDS;gene	rpoC2_CDS-N1;rpoC2_gene-N1	rpoC2:TCT->TTT	rpoC2:S381F
Ginkgo biloba	21688	G	C->T	3	0	0	0	3	-	1	CDS;gene	rpoC2_CDS-N1;rpoC2_gene-N1	rpoC2:CCT->CTT	rpoC2:P291L
Ginkgo biloba	22261	G	C->T	4	0	0	0	4	-	1	CDS;gene	rpoC2_CDS-N1;rpoC2_gene-N1	rpoC2:TCG->TTG	rpoC2:S100L
Ginkgo biloba	22844	G	C->T	10	0	3	0	13	-	0.769231	CDS;gene	rpoC1_CDS-N2;rpoC1_gene-N1	rpoC1:CAT->TAT	rpoC1:H630Y
Ginkgo biloba	23254	G	C->T	10	0	0	0	10	-	1	CDS;gene	rpoC1_CDS-N2;rpoC1_gene-N1	rpoC1:TCC->TTC	rpoC1:S493F
Ginkgo biloba	23281	G	C->T	7	0	1	0	8	-	0.875	CDS;gene	rpoC1_CDS-N2;rpoC1_gene-N1	rpoC1:TCG->TTG	rpoC1:S484L
Ginkgo biloba	23350	G	C->T	3	0	3	0	6	-	0.5	CDS;gene	rpoC1_CDS-N2;rpoC1_gene-N1	rpoC1:TCA->TTA	rpoC1:S461L
Ginkgo biloba	23371	G	C->T	9	0	3	0	12	-	0.75	CDS;gene	rpoC1_CDS-N2;rpoC1_gene-N1	rpoC1:TCG->TTG	rpoC1:S454L
Ginkgo biloba	23482	G	C->T	11	0	0	0	11	-	1	CDS;gene	rpoC1_CDS-N2;rpoC1_gene-N1	rpoC1:CCG->CTG	rpoC1:P417L
Ginkgo biloba	23623	G	C->T	11	0	1	0	12	-	0.916667	CDS;gene	rpoC1_CDS-N2;rpoC1_gene-N1	rpoC1:TCT->TTT	rpoC1:S370F
Ginkgo biloba	23794	G	C->T	7	0	3	0	10	-	0.7	CDS;gene	rpoC1_CDS-N2;rpoC1_gene-N1	rpoC1:TCA->TTA	rpoC1:S313L
Ginkgo biloba	23822	G	C->T	8	0	0	0	8	-	1	CDS;gene	rpoC1_CDS-N2;rpoC1_gene-N1	rpoC1:CAT->TAT	rpoC1:H304Y
Ginkgo biloba	23896	G	C->T	7	0	1	0	8	-	0.875	CDS;gene	rpoC1_CDS-N2;rpoC1_gene-N1	rpoC1:CCG->CTG	rpoC1:P279L
Ginkgo biloba	23992	G	C->T	7	0	4	0	11	-	0.636364	CDS;gene	rpoC1_CDS-N2;rpoC1_gene-N1	rpoC1:TCA->TTA	rpoC1:S247L
Ginkgo biloba	24040	G	C->T	11	0	2	0	13	-	0.846154	CDS;gene	rpoC1_CDS-N2;rpoC1_gene-N1	rpoC1:ACT->ATT	rpoC1:T231I
Ginkgo biloba	24106	G	C->T	8	0	0	0	8	-	1	CDS;gene	rpoC1_CDS-N2;rpoC1_gene-N1	rpoC1:CCG->CTG	rpoC1:P209L
Ginkgo biloba	24244	G	C->T	8	0	0	0	8	-	1	CDS;gene	rpoC1_CDS-N2;rpoC1_gene-N1	rpoC1:TCA->TTA	rpoC1:S163L
Ginkgo biloba	24253	G	C->T	9	0	0	0	9	-	1	CDS;gene	rpoC1_CDS-N2;rpoC1_gene-N1	rpoC1:TCA->TTA	rpoC1:S160L
Ginkgo biloba	25075	G	C->T	7	0	2	0	9	-	0.777778	CDS;gene	rpoC1_CDS-N1;rpoC1_gene-N1	rpoC1:TCA->TTA	rpoC1:S118L
Ginkgo biloba	25303	G	C->T	6	0	0	0	6	-	1	CDS;gene	rpoC1_CDS-N1;rpoC1_gene-N1	rpoC1:TCA->TTA	rpoC1:S42L
Ginkgo biloba	25429	G	C->T	5	0	4	0	9	-	0.555556	-	-	-	-
Ginkgo biloba	25518	G	C->T	7	0	1	0	8	-	0.875	CDS;gene	rpoB_CDS-N1;rpoB_gene-N1	rpoB:CCA->CTA	rpoB:P1053L
Ginkgo biloba	25665	G	C->T	8	0	1	0	9	-	0.888889	CDS;gene	rpoB_CDS-N1;rpoB_gene-N1	rpoB:TCG->TTG	rpoB:S1004L
Ginkgo biloba	25683	G	C->T	6	0	1	0	7	-	0.857143	CDS;gene	rpoB_CDS-N1;rpoB_gene-N1	rpoB:TCT->TTT	rpoB:S998F
Ginkgo biloba	25827	G	C->T	5	0	0	0	5	-	1	CDS;gene	rpoB_CDS-N1;rpoB_gene-N1	rpoB:CCG->CTG	rpoB:P950L
Ginkgo biloba	25966	G	C->T	3	0	0	0	3	-	1	CDS;gene	rpoB_CDS-N1;rpoB_gene-N1	rpoB:CCT->TCT	rpoB:P904S
Ginkgo biloba	26145	G	C->T	3	0	0	0	3	-	1	CDS;gene	rpoB_CDS-N1;rpoB_gene-N1	rpoB:TCG->TTG	rpoB:S844L
Ginkgo biloba	26718	G	C->T	5	0	0	0	5	-	1	CDS;gene	rpoB_CDS-N1;rpoB_gene-N1	rpoB:CCG->CTG	rpoB:P653L
Ginkgo biloba	27264	G	C->T	3	0	0	0	3	-	1	CDS;gene	rpoB_CDS-N1;rpoB_gene-N1	rpoB:CCA->CTA	rpoB:P471L
Ginkgo biloba	27828	G	C->T	5	0	0	0	5	-	1	CDS;gene	rpoB_CDS-N1;rpoB_gene-N1	rpoB:TCA->TTA	rpoB:S283L
Ginkgo biloba	27873	G	C->T	4	0	1	0	5	-	0.8	CDS;gene	rpoB_CDS-N1;rpoB_gene-N1	rpoB:CCG->CTG	rpoB:P268L
Ginkgo biloba	28134	G	C->T	3	0	0	0	3	-	1	CDS;gene	rpoB_CDS-N1;rpoB_gene-N1	rpoB:CCA->CTA	rpoB:P181L
Ginkgo biloba	28203	G	C->T	3	0	1	0	4	-	0.75	CDS;gene	rpoB_CDS-N1;rpoB_gene-N1	rpoB:CCA->CTA	rpoB:P158L
Ginkgo biloba	28527	G	C->T	3	0	2	0	5	-	0.6	CDS;gene	rpoB_CDS-N1;rpoB_gene-N1	rpoB:TCT->TTT	rpoB:S50F
Ginkgo biloba	31849	G	C->T	4	0	10	0	14	-	0.285714	CDS;gene	psbM_CDS-N1;psbM_gene-N1	psbM:TCA->TTA	psbM:S16L
Ginkgo biloba	31994	G	C->T	3	0	10	0	13	-	0.230769	-	-	-	-
Ginkgo biloba	32909	G	C->T	3	0	16	0	19	-	0.157895	-	-	-	-
Ginkgo biloba	33099	G	C->T	5	0	18	0	23	-	0.217391	-	-	-	-
Ginkgo biloba	37270	C	G->A	0	0	0	4	4	-	1	-	-	-	-
Ginkgo biloba	37342	G	C->T	3	0	0	0	3	-	1	-	-	-	-
Ginkgo biloba	38335	C	C->T	0	1	0	13	14	+	0.928571	CDS;gene	psbD_CDS-N1;psbD_gene-N1	psbD:GAC->GAT	psbD:D280D
Ginkgo biloba	39326	C	C->T	0	15	0	4	19	+	0.210526	CDS;gene	psbC_CDS-N1;psbC_gene-N1	psbC:TTC->TTT	psbC:F292F
Ginkgo biloba	40183	C	C->T	0	4	0	7	11	+	0.636364	-	-	-	-
Ginkgo biloba	40564	C	C->T	0	8	0	10	18	+	0.555556	CDS;gene	psbZ_CDS-N1;psbZ_gene-N1	psbZ:TCG->TTG	psbZ:S7L
Ginkgo biloba	40693	C	C->T	0	4	0	10	14	+	0.714286	CDS;gene	psbZ_CDS-N1;psbZ_gene-N1	psbZ:TCA->TTA	psbZ:S50L
Ginkgo biloba	40698	C	C->T	0	5	0	11	16	+	0.6875	CDS;gene	psbZ_CDS-N1;psbZ_gene-N1	psbZ:CTT->TTT	psbZ:L52F
Ginkgo biloba	40741	C	C->T	0	3	0	11	14	+	0.785714	-	-	-	-
Ginkgo biloba	41478	G	C->T	23	0	6	0	29	-	0.793103	CDS;gene	rps14_CDS-N1;rps14_gene-N1	rps14:CCA->TTA	rps14:P65L
Ginkgo biloba	41479	G	C->T	23	0	9	0	32	-	0.71875	CDS;gene	rps14_CDS-N1;rps14_gene-N1	rps14:CCA->TTA	rps14:P65L
Ginkgo biloba	41523	G	C->T	45	0	6	0	51	-	0.882353	CDS;gene	rps14_CDS-N1;rps14_gene-N1	rps14:CCA->CTA	rps14:P50L
Ginkgo biloba	41592	G	C->T	52	0	1	0	53	-	0.981132	CDS;gene	rps14_CDS-N1;rps14_gene-N1	rps14:CCG->CTG	rps14:P27L
Ginkgo biloba	42149	G	C->T	44	0	0	0	44	-	1	CDS;gene	psaB_CDS-N1;psaB_gene-N1	psaB:TCA->TTA	psaB:S620L
Ginkgo biloba	43123	G	C->T	3	0	25	0	28	-	0.107143	CDS;gene	psaB_CDS-N1;psaB_gene-N1	psaB:TTC->TTT	psaB:F295F
Ginkgo biloba	43370	G	C->T	17	0	0	0	17	-	1	CDS;gene	psaB_CDS-N1;psaB_gene-N1	psaB:TCA->TTA	psaB:S213L
Ginkgo biloba	45561	G	C->T	19	0	0	0	19	-	1	CDS;gene	psaA_CDS-N1;psaA_gene-N1	psaA:TCA->TTA	psaA:S242L
Ginkgo biloba	46789	G	C->T	5	0	25	0	30	-	0.166667	-	-	-	-
Ginkgo biloba	46912	G	C->T	26	0	3	0	29	-	0.896552	CDS;gene	ycf3_CDS-N3;ycf3_gene-N1	ycf3:CGG->TGG	ycf3:R161W
Ginkgo biloba	46982	G	C->T	9	0	17	0	26	-	0.346154	CDS;gene	ycf3_CDS-N3;ycf3_gene-N1	ycf3:TCC->TTT	ycf3:S137F
Ginkgo biloba	46983	G	C->T	16	0	10	0	26	-	0.615385	CDS;gene	ycf3_CDS-N3;ycf3_gene-N1	ycf3:TCC->TTT	ycf3:S137F
Ginkgo biloba	47209	G	C->T	25	0	2	0	27	-	0.925926	gene;intron	ycf3_gene-N1;ycf3_intron-N2	-	-
Ginkgo biloba	47214	G	C->T	26	0	1	0	27	-	0.962963	gene;intron	ycf3_gene-N1;ycf3_intron-N2	-	-
Ginkgo biloba	47380	G	C->T	14	0	12	0	26	-	0.538462	gene;intron	ycf3_gene-N1;ycf3_intron-N2	-	-
Ginkgo biloba	47467	G	C->T	52	0	2	0	54	-	0.962963	gene;intron	ycf3_gene-N1;ycf3_intron-N2	-	-
Ginkgo biloba	47586	G	C->T	31	0	2	0	33	-	0.939394	gene;intron	ycf3_gene-N1;ycf3_intron-N2	-	-
Ginkgo biloba	47893	G	C->T	15	0	6	0	21	-	0.714286	CDS;gene	ycf3_CDS-N2;ycf3_gene-N1	ycf3:CCC->CTC	ycf3:P76L
Ginkgo biloba	47926	G	C->T	18	0	4	0	22	-	0.818182	CDS;gene	ycf3_CDS-N2;ycf3_gene-N1	ycf3:CCG->CTG	ycf3:P65L
Ginkgo biloba	48432	G	C->T	25	0	1	0	26	-	0.961538	gene;intron	ycf3_gene-N1;ycf3_intron-N1	-	-
Ginkgo biloba	48794	G	C->T	18	0	4	0	22	-	0.818182	CDS;gene	ycf3_CDS-N1;ycf3_gene-N1	ycf3:TTC->TTT	ycf3:F10F
Ginkgo biloba	50008	G	C->T	9	0	3	0	12	-	0.75	CDS;gene	rps4_CDS-N1;rps4_gene-N1	rps4:CGA->TGA	rps4:R202U
Ginkgo biloba	50319	G	C->T	6	0	0	0	6	-	1	CDS;gene	rps4_CDS-N1;rps4_gene-N1	rps4:TCG->TTG	rps4:S98L
Ginkgo biloba	50340	G	C->T	8	0	0	0	8	-	1	CDS;gene	rps4_CDS-N1;rps4_gene-N1	rps4:TCG->TTG	rps4:S91L
Ginkgo biloba	50569	G	C->T	5	0	7	0	12	-	0.416667	CDS;gene	rps4_CDS-N1;rps4_gene-N1	rps4:CTG->TTG	rps4:L15L
Ginkgo biloba	51759	C	C->T	0	42	0	4	46	+	0.0869565	gene;intron	trnL-UAA_gene-N1;trnL-UAA_intron-N1	-	-
Ginkgo biloba	52645	G	C->T	4	0	11	0	15	-	0.266667	-	-	-	-
Ginkgo biloba	53116	G	C->T	7	0	4	0	11	-	0.636364	CDS;gene	ndhJ_CDS-N1;ndhJ_gene-N1	ndhJ:CAT->TAT	ndhJ:H122Y
Ginkgo biloba	53209	G	C->T	6	0	2	0	8	-	0.75	CDS;gene	ndhJ_CDS-N1;ndhJ_gene-N1	ndhJ:CCG->TCG	ndhJ:P91S
Ginkgo biloba	53541	G	C->T	9	0	1	0	10	-	0.9	CDS;gene	ndhK_CDS-N1;ndhK_gene-N1	ndhK:CAA->TAA	ndhK:Q303U
Ginkgo biloba	53822	G	C->T	9	0	1	0	10	-	0.9	CDS;gene	ndhK_CDS-N1;ndhK_gene-N1	ndhK:ACA->ATA	ndhK:T209I
Ginkgo biloba	54140	G	C->T	9	0	7	0	16	-	0.5625	CDS;gene	ndhK_CDS-N1;ndhK_gene-N1	ndhK:TCC->TTC	ndhK:S103F
Ginkgo biloba	54209	G	C->T	23	0	1	0	24	-	0.958333	CDS;gene	ndhK_CDS-N1;ndhK_gene-N1	ndhK:CCG->CTG	ndhK:P80L
Ginkgo biloba	54218	G	C->T	13	0	9	0	22	-	0.590909	CDS;gene	ndhK_CDS-N1;ndhK_gene-N1	ndhK:TCA->TTA	ndhK:S77L
Ginkgo biloba	54329	G	C->T	4	0	7	0	11	-	0.363636	CDS;gene	ndhC_CDS-N1;ndhC_gene-N1	ndhC:CAG->TAG	ndhC:Q121U
Ginkgo biloba	54329	G	C->T	4	0	7	0	11	-	0.363636	CDS;gene	ndhK_CDS-N1;ndhK_gene-N1	ndhK:TCA->TTA	ndhK:S40L
Ginkgo biloba	54367	G	C->T	4	0	10	0	14	-	0.285714	CDS;gene	ndhC_CDS-N1;ndhC_gene-N1	ndhC:CCA->CTA	ndhC:P108L
Ginkgo biloba	54367	G	C->T	4	0	10	0	14	-	0.285714	CDS;gene	ndhK_CDS-N1;ndhK_gene-N1	ndhK:TCC->TCT	ndhK:S27S
Ginkgo biloba	54379	G	C->T	7	0	6	0	13	-	0.538462	CDS;gene	ndhC_CDS-N1;ndhC_gene-N1	ndhC:TCA->TTA	ndhC:S104L
Ginkgo biloba	54379	G	C->T	7	0	6	0	13	-	0.538462	CDS;gene	ndhK_CDS-N1;ndhK_gene-N1	ndhK:CTC->CTT	ndhK:L23L
Ginkgo biloba	54392	G	C->T	5	0	7	0	12	-	0.416667	CDS;gene	ndhC_CDS-N1;ndhC_gene-N1	ndhC:CTC->TTC	ndhC:L100F
Ginkgo biloba	54392	G	C->T	5	0	7	0	12	-	0.416667	CDS;gene	ndhK_CDS-N1;ndhK_gene-N1	ndhK:TCT->TTT	ndhK:S19F
Ginkgo biloba	57595	G	C->T	10	0	2	0	12	-	0.833333	CDS;gene	atpE_CDS-N1;atpE_gene-N1	atpE:TCA->TTA	atpE:S24L
Ginkgo biloba	57975	G	C->T	7	0	0	0	7	-	1	CDS;gene	atpB_CDS-N1;atpB_gene-N1	atpB:TCA->TTA	atpB:S388L
Ginkgo biloba	58380	G	C->T	7	0	0	0	7	-	1	CDS;gene	atpB_CDS-N1;atpB_gene-N1	atpB:TCC->TTC	atpB:S253F
Ginkgo biloba	61842	C	C->T	0	4	0	7	11	+	0.636364	-	-	-	-
Ginkgo biloba	62128	C	C->T	0	0	0	9	9	+	1	CDS;gene	accD_CDS-N1;accD_gene-N1	accD:CGT->TGT	accD:R54C
Ginkgo biloba	62248	C	C->T	0	1	0	10	11	+	0.909091	CDS;gene	accD_CDS-N1;accD_gene-N1	accD:CGG->TGG	accD:R94W
Ginkgo biloba	62314	C	C->T	0	0	0	7	7	+	1	CDS;gene	accD_CDS-N1;accD_gene-N1	accD:CAT->TAT	accD:H116Y
Ginkgo biloba	62477	C	C->T	0	0	0	7	7	+	1	CDS;gene	accD_CDS-N1;accD_gene-N1	accD:CCG->CTG	accD:P170L
Ginkgo biloba	63472	C	C->T	0	43	0	4	47	+	0.0851064	CDS;gene	psaI_CDS-N1;psaI_gene-N1	psaI:CCC->TCC	psaI:P4S
Ginkgo biloba	63503	C	C->T	0	2	0	62	64	+	0.96875	CDS;gene	psaI_CDS-N1;psaI_gene-N1	psaI:GCG->GTG	psaI:A14V
Ginkgo biloba	64135	C	C->T	0	3	0	35	38	+	0.921053	CDS;gene	ycf4_CDS-N1;ycf4_gene-N1	ycf4:TCC->TCT	ycf4:S5S
Ginkgo biloba	64196	C	C->T	0	2	0	23	25	+	0.92	CDS;gene	ycf4_CDS-N1;ycf4_gene-N1	ycf4:CGT->TGT	ycf4:R26C
Ginkgo biloba	64341	C	C->T	0	2	0	31	33	+	0.939394	CDS;gene	ycf4_CDS-N1;ycf4_gene-N1	ycf4:CCG->CTG	ycf4:P74L
Ginkgo biloba	64374	C	C->T	0	0	0	25	25	+	1	CDS;gene	ycf4_CDS-N1;ycf4_gene-N1	ycf4:TCG->TTG	ycf4:S85L
Ginkgo biloba	64534	C	C->T	0	40	0	6	46	+	0.130435	CDS;gene	ycf4_CDS-N1;ycf4_gene-N1	ycf4:CCC->CCT	ycf4:P138P
Ginkgo biloba	65979	C	C->T	0	3	0	9	12	+	0.75	CDS;gene	cemA_CDS-N1;cemA_gene-N1	cemA:TCA->TTA	cemA:S125L
Ginkgo biloba	66153	C	C->T	0	4	0	6	10	+	0.6	CDS;gene	cemA_CDS-N1;cemA_gene-N1	cemA:TCT->TTT	cemA:S183F
Ginkgo biloba	66203	C	C->T	0	1	0	8	9	+	0.888889	CDS;gene	cemA_CDS-N1;cemA_gene-N1	cemA:CCA->TCA	cemA:P200S
Ginkgo biloba	66222	C	C->T	0	1	0	7	8	+	0.875	CDS;gene	cemA_CDS-N1;cemA_gene-N1	cemA:TCA->TTA	cemA:S206L
Ginkgo biloba	66880	C	C->T	0	0	0	7	7	+	1	CDS;gene	petA_CDS-N1;petA_gene-N1	petA:CCA->CTA	petA:P110L
Ginkgo biloba	67166	C	C->T	0	8	0	3	11	+	0.272727	CDS;gene	petA_CDS-N1;petA_gene-N1	petA:GTC->GTT	petA:V205V
Ginkgo biloba	68803	G	C->T	16	0	3	0	19	-	0.842105	-	-	-	-
Ginkgo biloba	68895	G	C->T	12	0	0	0	12	-	1	CDS;gene	psbL_CDS-N1;psbL_gene-N1	psbL:TCT->TTT	psbL:S36F
Ginkgo biloba	68906	G	C->T	3	0	13	0	16	-	0.1875	CDS;gene	psbL_CDS-N1;psbL_gene-N1	psbL:TTC->TTT	psbL:F32F
Ginkgo biloba	69067	G	C->T	14	0	1	0	15	-	0.933333	CDS;gene	psbF_CDS-N1;psbF_gene-N1	psbF:TCT->TTT	psbF:S26F
Ginkgo biloba	69191	G	C->T	16	0	0	0	16	-	1	CDS;gene	psbE_CDS-N1;psbE_gene-N1	psbE:CCG->TCG	psbE:P72S
Ginkgo biloba	71219	C	C->T	0	4	0	4	8	+	0.5	CDS;gene	petL_CDS-N1;petL_gene-N1	petL:ACG->ATG	petL:T1M
Ginkgo biloba	71222	C	C->T	0	4	0	5	9	+	0.555556	CDS;gene	petL_CDS-N1;petL_gene-N1	petL:CCT->CTT	petL:P2L
Ginkgo biloba	71267	C	C->T	0	2	0	6	8	+	0.75	CDS;gene	petL_CDS-N1;petL_gene-N1	petL:TCA->TTA	petL:S17L
Ginkgo biloba	71311	C	C->T	0	1	0	5	6	+	0.833333	CDS;gene	petL_CDS-N1;petL_gene-N1	petL:CAA->TAA	petL:Q32U
Ginkgo biloba	71462	C	C->T	0	5	0	5	10	+	0.5	-	-	-	-
Ginkgo biloba	71490	C	C->T	0	0	0	21	21	+	1	CDS;gene	petG_CDS-N1;petG_gene-N1	petG:CCA->CTA	petG:P6L
Ginkgo biloba	72308	C	C->T	0	3	0	4	7	+	0.571429	-	-	-	-
Ginkgo biloba	72852	C	C->T	0	0	0	10	10	+	1	CDS;gene	rpl33_CDS-N1;rpl33_gene-N1	rpl33:TCG->TTG	rpl33:S13L
Ginkgo biloba	72951	C	C->T	0	11	0	15	26	+	0.576923	CDS;gene	rpl33_CDS-N1;rpl33_gene-N1	rpl33:TCG->TTG	rpl33:S46L
Ginkgo biloba	73029	C	C->T	0	42	0	6	48	+	0.125	-	-	-	-
Ginkgo biloba	73218	C	C->T	0	26	0	19	45	+	0.422222	CDS;gene	rps18_CDS-N1;rps18_gene-N1	rps18:CAT->TAT	rps18:H27Y
Ginkgo biloba	73351	C	C->T	0	6	0	34	40	+	0.85	CDS;gene	rps18_CDS-N1;rps18_gene-N1	rps18:TCG->TTG	rps18:S71L
Ginkgo biloba	73377	C	C->T	0	2	0	28	30	+	0.933333	CDS;gene	rps18_CDS-N1;rps18_gene-N1	rps18:CAA->TAA	rps18:Q80U
Ginkgo biloba	73618	G	C->T	28	0	7	0	35	-	0.8	CDS;gene	rpl20_CDS-N1;rpl20_gene-N1	rpl20:TCC->TCT	rpl20:S107S
Ginkgo biloba	73656	G	C->T	4	0	36	0	40	-	0.1	CDS;gene	rpl20_CDS-N1;rpl20_gene-N1	rpl20:CTT->TTT	rpl20:L95F
Ginkgo biloba	73670	G	C->T	36	0	12	0	48	-	0.75	CDS;gene	rpl20_CDS-N1;rpl20_gene-N1	rpl20:CCG->CTG	rpl20:P90L
Ginkgo biloba	74547	G	C->T	37	0	0	0	37	-	1	-	-	-	-
Ginkgo biloba	75760	G	C->T	77	0	14	0	91	-	0.846154	CDS;gene	clpP_CDS-N2;clpP_gene-N1	clpP:TCA->TTA	clpP:S106L
Ginkgo biloba	75766	G	C->T	113	0	11	0	124	-	0.91129	CDS;gene	clpP_CDS-N2;clpP_gene-N1	clpP:TCT->TTT	clpP:S104F
Ginkgo biloba	75886	G	C->T	63	0	25	0	88	-	0.715909	CDS;gene	clpP_CDS-N2;clpP_gene-N1	clpP:ACA->ATA	clpP:T64I
Ginkgo biloba	75919	G	C->T	72	0	14	0	86	-	0.837209	CDS;gene	clpP_CDS-N2;clpP_gene-N1	clpP:CCG->CTG	clpP:P53L
Ginkgo biloba	75998	G	C->T	193	0	7	0	200	-	0.965	CDS;gene	clpP_CDS-N2;clpP_gene-N1	clpP:CAT->TAT	clpP:H27Y
Ginkgo biloba	76310	G	C->T	147	0	38	0	185	-	0.794595	gene;intron	clpP_gene-N1;clpP_intron-N1	-	-
Ginkgo biloba	76554	G	C->T	10	0	104	0	114	-	0.0877193	gene;intron	clpP_gene-N1;clpP_intron-N1	-	-
Ginkgo biloba	77028	G	C->T	4	0	16	0	20	-	0.2	-	-	-	-
Ginkgo biloba	77218	C	C->T	0	9	0	10	19	+	0.526316	-	-	-	-
Ginkgo biloba	77729	C	C->T	0	2	0	13	15	+	0.866667	CDS;gene	psbB_CDS-N1;psbB_gene-N1	psbB:CCA->CTA	psbB:P133L
Ginkgo biloba	77972	C	C->T	0	1	0	14	15	+	0.933333	CDS;gene	psbB_CDS-N1;psbB_gene-N1	psbB:CCA->CTA	psbB:P214L
Ginkgo biloba	78349	C	C->T	0	0	0	23	23	+	1	CDS;gene	psbB_CDS-N1;psbB_gene-N1	psbB:CGG->TGG	psbB:R340W
Ginkgo biloba	78722	C	C->T	0	0	0	18	18	+	1	CDS;gene	psbB_CDS-N1;psbB_gene-N1	psbB:TCC->TTT	psbB:S464F
Ginkgo biloba	78723	C	C->T	0	10	0	8	18	+	0.444444	CDS;gene	psbB_CDS-N1;psbB_gene-N1	psbB:TCC->TTT	psbB:S464F
Ginkgo biloba	78777	C	C->T	0	13	0	3	16	+	0.1875	CDS;gene	psbB_CDS-N1;psbB_gene-N1	psbB:ATC->ATT	psbB:I482I
Ginkgo biloba	78991	C	C->T	0	25	0	11	36	+	0.305556	-	-	-	-
Ginkgo biloba	79585	C	C->T	0	3	0	13	16	+	0.8125	CDS;gene	psbH_CDS-N1;psbH_gene-N1	psbH:CCG->CTG	psbH:P58L
Ginkgo biloba	81185	C	C->T	0	5	0	24	29	+	0.827586	CDS;gene	petB_CDS-N1;petB_gene-N1	petB:CCA->TCA	petB:P215S
Ginkgo biloba	81800	C	C->T	0	2	0	12	14	+	0.857143	-	-	-	-
Ginkgo biloba	82117	C	C->T	0	2	0	9	11	+	0.818182	-	-	-	-
Ginkgo biloba	82246	C	C->T	0	0	0	13	13	+	1	CDS;gene	petD_CDS-N1;petD_gene-N1	petD:TCA->TTA	petD:S24L
Ginkgo biloba	82330	C	C->T	0	1	0	20	21	+	0.952381	CDS;gene	petD_CDS-N1;petD_gene-N1	petD:TCG->TTG	petD:S52L
Ginkgo biloba	82339	C	C->T	0	0	0	26	26	+	1	CDS;gene	petD_CDS-N1;petD_gene-N1	petD:TCG->TTG	petD:S55L
Ginkgo biloba	82453	C	C->T	0	0	0	25	25	+	1	CDS;gene	petD_CDS-N1;petD_gene-N1	petD:TCG->TTG	petD:S93L
Ginkgo biloba	82593	C	C->T	0	2	0	16	18	+	0.888889	CDS;gene	petD_CDS-N1;petD_gene-N1	petD:CAA->TAA	petD:Q140U
Ginkgo biloba	82928	G	C->T	16	0	2	0	18	-	0.888889	CDS;gene	rpoA_CDS-N1;rpoA_gene-N1	rpoA:CCA->CTA	rpoA:P306L
Ginkgo biloba	83015	G	C->T	17	0	1	0	18	-	0.944444	CDS;gene	rpoA_CDS-N1;rpoA_gene-N1	rpoA:TCA->TTA	rpoA:S277L
Ginkgo biloba	83243	G	C->T	17	0	0	0	17	-	1	CDS;gene	rpoA_CDS-N1;rpoA_gene-N1	rpoA:TCC->TTC	rpoA:S201F
Ginkgo biloba	83318	G	C->T	16	0	1	0	17	-	0.941176	CDS;gene	rpoA_CDS-N1;rpoA_gene-N1	rpoA:TCT->TTT	rpoA:S176F
Ginkgo biloba	83399	G	C->T	16	0	4	0	20	-	0.8	CDS;gene	rpoA_CDS-N1;rpoA_gene-N1	rpoA:TCA->TTA	rpoA:S149L
Ginkgo biloba	83411	G	C->T	15	0	4	0	19	-	0.789474	CDS;gene	rpoA_CDS-N1;rpoA_gene-N1	rpoA:TCA->TTA	rpoA:S145L
Ginkgo biloba	83546	G	C->T	7	0	9	0	16	-	0.4375	CDS;gene	rpoA_CDS-N1;rpoA_gene-N1	rpoA:CCG->CTG	rpoA:P100L
Ginkgo biloba	83582	G	C->T	14	0	8	0	22	-	0.636364	CDS;gene	rpoA_CDS-N1;rpoA_gene-N1	rpoA:TCA->TTA	rpoA:S88L
Ginkgo biloba	83745	G	C->T	21	0	3	0	24	-	0.875	CDS;gene	rpoA_CDS-N1;rpoA_gene-N1	rpoA:CTA->TTA	rpoA:L34L
Ginkgo biloba	84486	G	C->T	34	0	2	0	36	-	0.944444	CDS;gene	rpl36_CDS-N1;rpl36_gene-N1	rpl36:CGT->TGT	rpl36:R11C
Ginkgo biloba	84785	G	C->T	37	0	3	0	40	-	0.925	CDS;gene	infA_CDS-N1;infA_gene-N1	infA:TCA->TTA	infA:S26L
Ginkgo biloba	84999	G	C->T	25	0	2	0	27	-	0.925926	CDS;gene	rps8_CDS-N1;rps8_gene-N1	rps8:CGC->TGC	rps8:R135C
Ginkgo biloba	85154	G	C->T	29	0	1	0	30	-	0.966667	CDS;gene	rps8_CDS-N1;rps8_gene-N1	rps8:TCG->TTG	rps8:S83L
Ginkgo biloba	85212	G	C->T	44	0	2	0	46	-	0.956522	CDS;gene	rps8_CDS-N1;rps8_gene-N1	rps8:CTT->TTT	rps8:L64F
Ginkgo biloba	85382	G	C->T	19	0	4	0	23	-	0.826087	CDS;gene	rps8_CDS-N1;rps8_gene-N1	rps8:ACG->ATG	rps8:T7M
Ginkgo biloba	85535	G	C->T	28	0	1	0	29	-	0.965517	CDS;gene	rpl14_CDS-N1;rpl14_gene-N1	rpl14:CCA->TCA	rpl14:P116S
Ginkgo biloba	85701	G	C->T	5	0	36	0	41	-	0.121951	CDS;gene	rpl14_CDS-N1;rpl14_gene-N1	rpl14:GCC->GCT	rpl14:A60A
Ginkgo biloba	85785	G	C->T	3	0	39	0	42	-	0.0714286	CDS;gene	rpl14_CDS-N1;rpl14_gene-N1	rpl14:TAC->TAT	rpl14:Y32Y
Ginkgo biloba	86001	G	C->T	6	0	43	0	49	-	0.122449	CDS;gene	rpl16_CDS-N1;rpl16_gene-N1	rpl16:TCG->TTG	rpl16:S136L
Ginkgo biloba	86735	G	C->T	29	0	13	0	42	-	0.690476	-	-	-	-
Ginkgo biloba	87494	G	C->T	116	0	2	0	118	-	0.983051	CDS;gene	rps3_CDS-N1;rps3_gene-N1	rps3:CAT->TAT	rps3:H195Y
Ginkgo biloba	87768	G	C->T	8	0	101	0	109	-	0.0733945	CDS;gene	rps3_CDS-N1;rps3_gene-N1	rps3:CTC->CTT	rps3:L103L
Ginkgo biloba	88208	G	C->T	5	0	77	0	82	-	0.0609756	CDS;gene	rpl22_CDS-N1;rpl22_gene-N1	rpl22:CAA->TAA	rpl22:Q97U
Ginkgo biloba	88749	G	C->T	7	0	64	0	71	-	0.0985915	CDS;gene	rps19_CDS-N1;rps19_gene-N1	rps19:CTC->CTT	rps19:L22L
Ginkgo biloba	88768	G	C->T	69	0	19	0	88	-	0.784091	CDS;gene	rps19_CDS-N1;rps19_gene-N1	rps19:TCG->TTG	rps19:S16L
Ginkgo biloba	88771	G	C->T	77	0	8	0	85	-	0.905882	CDS;gene	rps19_CDS-N1;rps19_gene-N1	rps19:TCA->TTA	rps19:S15L
Ginkgo biloba	88787	G	C->T	57	0	17	0	74	-	0.77027	CDS;gene	rps19_CDS-N1;rps19_gene-N1	rps19:CTT->TTT	rps19:L10F
Ginkgo biloba	88891	G	C->T	29	0	42	0	71	-	0.408451	CDS;gene	rpl2_CDS-N2;rpl2_gene-N1	rpl2:TCA->TTA	rpl2:S269L
Ginkgo biloba	88957	G	C->T	45	0	13	0	58	-	0.775862	CDS;gene	rpl2_CDS-N2;rpl2_gene-N1	rpl2:GCG->GTG	rpl2:A247V
Ginkgo biloba	89185	G	C->T	109	0	20	0	129	-	0.844961	CDS;gene	rpl2_CDS-N2;rpl2_gene-N1	rpl2:TCG->TTG	rpl2:S171L
Ginkgo biloba	89362	G	C->T	8	0	117	0	125	-	0.064	gene;intron	rpl2_gene-N1;rpl2_intron-N1	-	-
Ginkgo biloba	89995	G	C->T	74	0	26	0	100	-	0.74	gene;intron	rpl2_gene-N1;rpl2_intron-N1	-	-
Ginkgo biloba	90025	G	C->T	67	0	37	0	104	-	0.644231	CDS;gene	rpl2_CDS-N1;rpl2_gene-N1	rpl2:CCA->CTA	rpl2:P131L
Ginkgo biloba	90135	G	C->T	97	0	17	0	114	-	0.850877	CDS;gene	rpl2_CDS-N1;rpl2_gene-N1	rpl2:CTC->CTT	rpl2:L94L
Ginkgo biloba	92856	C	C->T	0	9	0	4	13	+	0.307692	CDS;gene	ycf2_CDS-N1;ycf2_gene-N1	ycf2:TCC->TCT	ycf2:S343S
Ginkgo biloba	96524	C	C->T	0	0	0	5	5	+	1	CDS;gene	ycf2_CDS-N1;ycf2_gene-N1	ycf2:CCT->CTT	ycf2:P1566L
Ginkgo biloba	97295	C	C->T	0	0	0	8	8	+	1	CDS;gene	ycf2_CDS-N1;ycf2_gene-N1	ycf2:TCA->TTA	ycf2:S1823L
Ginkgo biloba	97421	C	C->T	0	3	0	4	7	+	0.571429	CDS;gene	ycf2_CDS-N1;ycf2_gene-N1	ycf2:CCT->CTT	ycf2:P1865L
Ginkgo biloba	98521	C	C->T	0	1	0	6	7	+	0.857143	CDS;gene	ycf2_CDS-N1;ycf2_gene-N1	ycf2:CGG->TGG	ycf2:R2232W
Ginkgo biloba	113813	G	G->A	283	0	241	0	524	+	0.540076	gene;rRNA	rrn23_gene-N1;rrn23_rRNA-N1	-	-
Ginkgo biloba	117046	C	C->T	0	0	0	8	8	+	1	CDS;gene	chlL_CDS-N1;chlL_gene-N1	chlL:ATC->ATT	chlL:I38I
Ginkgo biloba	118009	C	C->T	0	0	0	5	5	+	1	CDS;gene	chlN_CDS-N1;chlN_gene-N1	chlN:TCT->TTT	chlN:S36F
Ginkgo biloba	118749	C	C->T	0	2	0	8	10	+	0.8	CDS;gene	chlN_CDS-N1;chlN_gene-N1	chlN:CCT->TCT	chlN:P283S
Ginkgo biloba	118822	C	C->T	0	3	0	6	9	+	0.666667	CDS;gene	chlN_CDS-N1;chlN_gene-N1	chlN:CCT->CTT	chlN:P307L
Ginkgo biloba	119155	C	C->T	0	0	0	6	6	+	1	CDS;gene	chlN_CDS-N1;chlN_gene-N1	chlN:TCT->TTT	chlN:S418F
Ginkgo biloba	119614	C	C->T	0	0	0	4	4	+	1	-	-	-	-
Ginkgo biloba	119781	C	C->T	0	0	0	4	4	+	1	-	-	-	-
Ginkgo biloba	121654	C	C->T	0	0	0	4	4	+	1	-	-	-	-
Ginkgo biloba	122242	C	C->T	0	0	0	12	12	+	1	-	-	-	-
Ginkgo biloba	123490	C	C->T	0	2	0	7	9	+	0.777778	-	-	-	-
Ginkgo biloba	126628	C	C->T	0	0	0	8	8	+	1	CDS;gene	ndhH_CDS-N1;ndhH_gene-N1	ndhH:CCT->CTT	ndhH:P363L
Ginkgo biloba	126740	C	C->T	0	0	0	3	3	+	1	-	-	-	-
Ginkgo biloba	126854	C	C->T	0	1	0	4	5	+	0.8	-	-	-	-
Ginkgo biloba	127022	C	C->T	0	1	0	4	5	+	0.8	-	-	-	-
Ginkgo biloba	127055	C	C->T	0	1	0	3	4	+	0.75	-	-	-	-
Ginkgo biloba	127121	C	C->T	0	1	0	5	6	+	0.833333	-	-	-	-
Ginkgo biloba	127151	C	C->T	0	1	0	5	6	+	0.833333	-	-	-	-
Ginkgo biloba	129452	C	C->T	0	1	0	3	4	+	0.75	CDS;gene	ndhI_CDS-N1;ndhI_gene-N1	ndhI:TCT->TTT	ndhI:S160F
Ginkgo biloba	129918	C	C->T	0	0	0	3	3	+	1	CDS;gene	ndhG_CDS-N1;ndhG_gene-N1	ndhG:TCG->TTG	ndhG:S41L
Ginkgo biloba	130444	C	C->T	0	0	0	9	9	+	1	-	-	-	-
Ginkgo biloba	130445	C	C->T	0	5	0	4	9	+	0.444444	-	-	-	-
Ginkgo biloba	130503	C	C->T	0	0	0	4	4	+	1	CDS;gene	ndhE_CDS-N1;ndhE_gene-N1	ndhE:TCA->TTA	ndhE:S8L
Ginkgo biloba	130515	C	C->T	0	0	0	3	3	+	1	CDS;gene	ndhE_CDS-N1;ndhE_gene-N1	ndhE:TCG->TTG	ndhE:S12L
Ginkgo biloba	130722	C	C->T	0	0	0	5	5	+	1	CDS;gene	ndhE_CDS-N1;ndhE_gene-N1	ndhE:CCA->CTA	ndhE:P81L
Ginkgo biloba	132467	C	C->T	0	0	0	4	4	+	1	CDS;gene	ndhD_CDS-N1;ndhD_gene-N1	ndhD:TCG->TTG	ndhD:S281L
Ginkgo biloba	132530	C	C->T	0	0	0	3	3	+	1	CDS;gene	ndhD_CDS-N1;ndhD_gene-N1	ndhD:TCG->TTG	ndhD:S302L
Ginkgo biloba	132665	C	C->T	0	0	0	5	5	+	1	CDS;gene	ndhD_CDS-N1;ndhD_gene-N1	ndhD:TCC->TTC	ndhD:S347F
Ginkgo biloba	132671	C	C->T	0	1	0	4	5	+	0.8	CDS;gene	ndhD_CDS-N1;ndhD_gene-N1	ndhD:TCG->TTG	ndhD:S349L
Ginkgo biloba	133429	G	C->T	6	0	1	0	7	-	0.857143	CDS;gene	ccsA_CDS-N1;ccsA_gene-N1	ccsA:CAG->TAG	ccsA:Q322U
Ginkgo biloba	133627	G	C->T	6	0	1	0	7	-	0.857143	CDS;gene	ccsA_CDS-N1;ccsA_gene-N1	ccsA:CGG->TGG	ccsA:R256W
Ginkgo biloba	133666	G	C->T	5	0	1	0	6	-	0.833333	CDS;gene	ccsA_CDS-N1;ccsA_gene-N1	ccsA:CCT->TCT	ccsA:P243S
Ginkgo biloba	134364	G	C->T	3	0	0	0	3	-	1	CDS;gene	ccsA_CDS-N1;ccsA_gene-N1	ccsA:TCA->TTA	ccsA:S10L
Ginkgo biloba	134903	G	C->T	7	0	0	0	7	-	1	-	-	-	-
Ginkgo biloba	137192	C	C->T	0	1	0	3	4	+	0.75	CDS;gene	ndhF_CDS-N1;ndhF_gene-N1	ndhF:CCG->CTG	ndhF:P47L
Ginkgo biloba	137219	C	C->T	0	0	0	5	5	+	1	CDS;gene	ndhF_CDS-N1;ndhF_gene-N1	ndhF:TCC->TTC	ndhF:S56F
Ginkgo biloba	137348	C	C->T	0	0	0	3	3	+	1	CDS;gene	ndhF_CDS-N1;ndhF_gene-N1	ndhF:TCA->TTA	ndhF:S99L
Ginkgo biloba	138013	C	C->T	0	2	0	4	6	+	0.666667	CDS;gene	ndhF_CDS-N1;ndhF_gene-N1	ndhF:CAT->TAT	ndhF:H321Y
Ginkgo biloba	138289	C	C->T	0	2	0	5	7	+	0.714286	CDS;gene	ndhF_CDS-N1;ndhF_gene-N1	ndhF:CGT->TGT	ndhF:R413C
Ginkgo biloba	138704	C	C->T	0	2	0	4	6	+	0.666667	CDS;gene	ndhF_CDS-N1;ndhF_gene-N1	ndhF:CCA->CTA	ndhF:P551L
Ginkgo biloba	138806	C	C->T	0	3	0	4	7	+	0.571429	CDS;gene	ndhF_CDS-N1;ndhF_gene-N1	ndhF:GCA->GTA	ndhF:A585V
Ginkgo biloba	138907	C	C->T	0	1	0	6	7	+	0.857143	CDS;gene	ndhF_CDS-N1;ndhF_gene-N1	ndhF:CTT->TTT	ndhF:L619F
Ginkgo biloba	142546	C	G->A	0	312	1	297	610	-	0.486885	gene;rRNA	rrn23_gene-N2;rrn23_rRNA-N2	-	-

## Sheet: Cedrus deodara
Species	Coordinate	Gbase	EditType	Cedrus.RNA_baseCount[A	C	G	T	total	Strand	frequency	TargetedGenomicFeature	TargetedFeatureID	CodonChange	AminoAcidChange
Cedrus deodara	4448	C	C->T	0	20	0	32	52	+	0.615385	gene;intron	petB_gene-N1;petB_intron-N1	-	-
Cedrus deodara	4965	C	C->T	0	1	0	38	39	+	0.974359	CDS;gene	petB_CDS-N2;petB_gene-N1	petB:CGG->TGG	petB:R9W
Cedrus deodara	5545	C	C->T	0	1	0	30	31	+	0.967742	CDS;gene	petB_CDS-N2;petB_gene-N1	petB:CCA->CTA	petB:P202L
Cedrus deodara	6829	C	C->T	0	12	0	23	35	+	0.657143	CDS;gene	petD_CDS-N2;petD_gene-N1	petD:TCA->TTA	petD:S109L
Cedrus deodara	6904	C	C->T	0	5	0	12	17	+	0.705882	CDS;gene	petD_CDS-N2;petD_gene-N1	petD:TCC->TTC	petD:S134F
Cedrus deodara	6987	C	C->T	0	8	0	20	28	+	0.714286	CDS;gene	petD_CDS-N2;petD_gene-N1	petD:CAA->TAA	petD:Q162U
Cedrus deodara	7809	G	C->T	31	0	2	0	33	-	0.939394	CDS;gene	rpoA_CDS-N1;rpoA_gene-N1	rpoA:TCT->TTT	rpoA:S145F
Cedrus deodara	9509	G	C->T	56	0	3	0	59	-	0.949153	CDS;gene	rps8_CDS-N1;rps8_gene-N1	rps8:TCG->TTG	rps8:S85L
Cedrus deodara	9533	G	C->T	49	0	23	0	72	-	0.680556	CDS;gene	rps8_CDS-N1;rps8_gene-N1	rps8:TCA->TTA	rps8:S77L
Cedrus deodara	9575	G	C->T	21	0	70	0	91	-	0.230769	CDS;gene	rps8_CDS-N1;rps8_gene-N1	rps8:TCA->TTA	rps8:S63L
Cedrus deodara	13113	G	C->T	471	0	72	0	543	-	0.867403	CDS;gene	rps19_CDS-N1;rps19_gene-N1	rps19:TCA->TTA	rps19:S15L
Cedrus deodara	14959	G	C->T	303	0	361	0	664	-	0.456325	CDS;gene	rpl23_CDS-N1;rpl23_gene-N1	rpl23:CAA->TAA	rpl23:Q21U
Cedrus deodara	18756	C	C->T	0	0	0	29	29	+	1	CDS;gene	rps4_CDS-N1;rps4_gene-N1	rps4:CCA->CTA	rps4:P48L
Cedrus deodara	21308	C	C->T	0	14	0	9	23	+	0.391304	CDS;gene	ycf3_CDS-N2;ycf3_gene-N1	ycf3:CCG->CTG	ycf3:P65L
Cedrus deodara	21768	C	C->T	0	6	0	21	27	+	0.777778	gene;intron	ycf3_gene-N1;ycf3_intron-N2	-	-
Cedrus deodara	24330	C	C->T	0	0	0	29	29	+	1	CDS;gene	psaA_CDS-N1;psaA_gene-N1	psaA:CCA->CTA	psaA:P462L
Cedrus deodara	26077	C	C->T	0	0	0	50	50	+	1	CDS;gene	psaB_CDS-N1;psaB_gene-N1	psaB:TCA->TTA	psaB:S285L
Cedrus deodara	27726	C	C->T	0	22	0	73	95	+	0.768421	CDS;gene	rps14_CDS-N1;rps14_gene-N1	rps14:TCA->TTA	rps14:S49L
Cedrus deodara	28602	G	C->T	14	0	35	0	49	-	0.285714	CDS;gene	psbZ_CDS-N1;psbZ_gene-N1	psbZ:TCA->TTA	psbZ:S50L
Cedrus deodara	28731	G	C->T	22	0	13	0	35	-	0.628571	CDS;gene	psbZ_CDS-N1;psbZ_gene-N1	psbZ:TCG->TTG	psbZ:S7L
Cedrus deodara	39991	G	G->A	1619	0	938	2	2559	+	0.632669	gene;rRNA	rrn23_gene-N1;rrn23_rRNA-N1	-	-
Cedrus deodara	44153	C	C->T	0	1	0	13	14	+	0.928571	CDS;gene	chlN_CDS-N1;chlN_gene-N1	chlN:CCT->TCT	chlN:P286S
Cedrus deodara	44302	C	C->T	0	17	0	8	25	+	0.32	CDS;gene	chlN_CDS-N1;chlN_gene-N1	chlN:ATC->ATT	chlN:I335I
Cedrus deodara	45603	C	C->T	0	0	0	5	5	+	1	CDS;gene	ycf1_CDS-N1;ycf1_gene-N1	ycf1:TCA->TTA	ycf1:S219L
Cedrus deodara	53719	G	C->T	32	0	5	0	37	-	0.864865	CDS;gene	ccsA_CDS-N1;ccsA_gene-N1	ccsA:CGT->TGT	ccsA:R301C
Cedrus deodara	53904	G	C->T	15	0	14	0	29	-	0.517241	CDS;gene	ccsA_CDS-N1;ccsA_gene-N1	ccsA:ACT->ATT	ccsA:T239I
Cedrus deodara	53916	G	C->T	29	0	2	0	31	-	0.935484	CDS;gene	ccsA_CDS-N1;ccsA_gene-N1	ccsA:TCA->TTA	ccsA:S235L
Cedrus deodara	53931	G	C->T	19	0	7	0	26	-	0.730769	CDS;gene	ccsA_CDS-N1;ccsA_gene-N1	ccsA:CCC->CTC	ccsA:P230L
Cedrus deodara	54213	G	C->T	18	0	3	0	21	-	0.857143	CDS;gene	ccsA_CDS-N1;ccsA_gene-N1	ccsA:TCA->TTA	ccsA:S136L
Cedrus deodara	56355	G	C->T	13	0	0	0	13	-	1	CDS;gene	rpl32_CDS-N1;rpl32_gene-N1	rpl32:CGG->TGG	rpl32:R20W
Cedrus deodara	58571	C	C->T	0	9	0	56	65	+	0.861538	-	-	-	-
Cedrus deodara	59091	C	C->T	0	7	0	52	59	+	0.881356	gene;intron	rps12_gene-N2;rps12_intron-N1	-	-
Cedrus deodara	62626	G	C->T	5	0	8	0	13	-	0.384615	CDS;gene	ycf2_CDS-N1;ycf2_gene-N1	ycf2:ATC->ATT	ycf2:I2108I
Cedrus deodara	63986	G	C->T	9	0	0	0	9	-	1	CDS;gene	ycf2_CDS-N1;ycf2_gene-N1	ycf2:TCA->TTA	ycf2:S1655L
Cedrus deodara	64269	G	C->T	7	0	0	0	7	-	1	CDS;gene	ycf2_CDS-N1;ycf2_gene-N1	ycf2:CCG->TCG	ycf2:P1561S
Cedrus deodara	65039	G	C->T	5	0	3	0	8	-	0.625	CDS;gene	ycf2_CDS-N1;ycf2_gene-N1	ycf2:CCT->CTT	ycf2:P1304L
Cedrus deodara	68381	G	C->T	9	0	6	0	15	-	0.6	CDS;gene	ycf2_CDS-N1;ycf2_gene-N1	ycf2:TCG->TTG	ycf2:S190L
Cedrus deodara	71607	G	C->T	44	0	28	0	72	-	0.611111	CDS;gene	matK_CDS-N1;matK_gene-N1;	matK:TCA->TTA	matK:S489L
Cedrus deodara	71607	G	C->T	44	0	28	0	72	-	0.611111	gene;intron	trnK_gene-N1;trnK_intron-N1	-	-
Cedrus deodara	72087	G	C->T	16	0	29	0	45	-	0.355556	CDS;gene	matK_CDS-N1;matK_gene-N1;	matK:CCA->CTA	matK:P329L
Cedrus deodara	72087	G	C->T	16	0	29	0	45	-	0.355556	gene;intron	trnK_gene-N1;trnK_intron-N1	-	-
Cedrus deodara	72166	G	C->T	18	0	29	0	47	-	0.382979	CDS;gene	matK_CDS-N1;matK_gene-N1;	matK:CGG->TGG	matK:R303W
Cedrus deodara	72166	G	C->T	18	0	29	0	47	-	0.382979	gene;intron	trnK_gene-N1;trnK_intron-N1	-	-
Cedrus deodara	72174	G	C->T	25	0	23	0	48	-	0.520833	CDS;gene	matK_CDS-N1;matK_gene-N1;	matK:CCA->CTA	matK:P300L
Cedrus deodara	72174	G	C->T	25	0	23	0	48	-	0.520833	gene;intron	trnK_gene-N1;trnK_intron-N1	-	-
Cedrus deodara	72546	G	C->T	40	0	5	0	45	-	0.888889	CDS;gene	matK_CDS-N1;matK_gene-N1;	matK:CCA->CTA	matK:P176L
Cedrus deodara	72546	G	C->T	40	0	5	0	45	-	0.888889	gene;intron	trnK_gene-N1;trnK_intron-N1	-	-
Cedrus deodara	74960	G	C->T	13	0	3	0	16	-	0.8125	CDS;gene	chlB_CDS-N1;chlB_gene-N1	chlB:CCA->CTA	chlB:P427L
Cedrus deodara	76227	G	C->T	7	0	5	0	12	-	0.583333	CDS;gene	chlB_CDS-N1;chlB_gene-N1	chlB:CAT->TAT	chlB:H5Y
Cedrus deodara	76228	G	C->T	6	0	6	0	12	-	0.5	CDS;gene	chlB_CDS-N1;chlB_gene-N1	chlB:GCC->GCT	chlB:A4A
Cedrus deodara	80479	G	C->T	47	0	9	0	56	-	0.839286	CDS;gene	atpA_CDS-N1;atpA_gene-N1	atpA:GCA->GTA	atpA:A335V
Cedrus deodara	80710	G	C->T	61	0	1	0	62	-	0.983871	CDS;gene	atpA_CDS-N1;atpA_gene-N1	atpA:TCA->TTA	atpA:S258L
Cedrus deodara	81711	G	C->T	114	0	5	0	119	-	0.957983	CDS;gene	atpF_CDS-N2;atpF_gene-N1	atpF:CCC->TCC	atpF:P124S
Cedrus deodara	82754	G	C->T	64	0	6	0	70	-	0.914286	CDS;gene	atpF_CDS-N1;atpF_gene-N1	atpF:CCA->CTA	atpF:P34L
Cedrus deodara	82790	G	C->T	71	0	10	0	81	-	0.876543	CDS;gene	atpF_CDS-N1;atpF_gene-N1	atpF:TCA->TTA	atpF:S22L
Cedrus deodara	84068	G	C->T	50	0	1	0	51	-	0.980392	CDS;gene	atpI_CDS-N1;atpI_gene-N1	atpI:CCT->CTT	atpI:P205L
Cedrus deodara	84254	G	C->T	63	0	3	0	66	-	0.954545	CDS;gene	atpI_CDS-N1;atpI_gene-N1	atpI:TCG->TTG	atpI:S143L
Cedrus deodara	85016	G	C->T	41	0	10	0	51	-	0.803922	CDS;gene	rps2_CDS-N1;rps2_gene-N1	rps2:TCA->TTA	rps2:S221L
Cedrus deodara	85334	G	C->T	46	0	17	0	63	-	0.730159	CDS;gene	rps2_CDS-N1;rps2_gene-N1	rps2:CCT->CTT	rps2:P115L
Cedrus deodara	85517	G	C->T	31	0	11	0	42	-	0.738095	CDS;gene	rps2_CDS-N1;rps2_gene-N1	rps2:TCA->TTA	rps2:S54L
Cedrus deodara	86127	G	C->T	13	0	2	0	15	-	0.866667	CDS;gene	rpoC2_CDS-N1;rpoC2_gene-N1	rpoC2:CGG->TGG	rpoC2:R1143W
Cedrus deodara	86318	G	C->T	17	0	1	0	18	-	0.944444	CDS;gene	rpoC2_CDS-N1;rpoC2_gene-N1	rpoC2:TCA->TTA	rpoC2:S1079L
Cedrus deodara	86591	G	C->T	25	0	3	0	28	-	0.892857	CDS;gene	rpoC2_CDS-N1;rpoC2_gene-N1	rpoC2:TCA->TTA	rpoC2:S988L
Cedrus deodara	86843	G	C->T	14	0	3	0	17	-	0.823529	CDS;gene	rpoC2_CDS-N1;rpoC2_gene-N1	rpoC2:CCT->CTT	rpoC2:P904L
Cedrus deodara	88617	G	C->T	6	0	2	0	8	-	0.75	CDS;gene	rpoC2_CDS-N1;rpoC2_gene-N1	rpoC2:CGG->TGG	rpoC2:R313W
Cedrus deodara	90251	G	C->T	12	0	5	0	17	-	0.705882	CDS;gene	rpoC1_CDS-N2;rpoC1_gene-N1	rpoC1:TCG->TTG	rpoC1:S496L
Cedrus deodara	90260	G	C->T	15	0	3	0	18	-	0.833333	CDS;gene	rpoC1_CDS-N2;rpoC1_gene-N1	rpoC1:TCA->TTA	rpoC1:S493L
Cedrus deodara	90863	G	C->T	13	0	10	0	23	-	0.565217	CDS;gene	rpoC1_CDS-N2;rpoC1_gene-N1	rpoC1:CCG->CTG	rpoC1:P292L
Cedrus deodara	91259	G	C->T	17	0	2	0	19	-	0.894737	CDS;gene	rpoC1_CDS-N2;rpoC1_gene-N1	rpoC1:TCA->TTA	rpoC1:S160L
Cedrus deodara	91806	G	C->T	8	0	5	0	13	-	0.615385	gene;intron	rpoC1_gene-N1;rpoC1_intron-N1	-	-
Cedrus deodara	91986	G	C->T	14	0	4	0	18	-	0.777778	CDS;gene	rpoC1_CDS-N1;rpoC1_gene-N1	rpoC1:CCA->CTA	rpoC1:P140L
Cedrus deodara	92241	G	C->T	18	0	4	0	22	-	0.818182	CDS;gene	rpoC1_CDS-N1;rpoC1_gene-N1	rpoC1:TCG->TTG	rpoC1:S55L
Cedrus deodara	92797	G	C->T	16	0	2	0	18	-	0.888889	CDS;gene	rpoB_CDS-N1;rpoB_gene-N1	rpoB:TCG->TTG	rpoB:S954L
Cedrus deodara	92936	G	C->T	5	0	4	0	9	-	0.555556	CDS;gene	rpoB_CDS-N1;rpoB_gene-N1	rpoB:CCT->TCT	rpoB:P908S
Cedrus deodara	93028	G	C->T	6	0	2	0	8	-	0.75	CDS;gene	rpoB_CDS-N1;rpoB_gene-N1	rpoB:CCC->CTC	rpoB:P877L
Cedrus deodara	93214	G	C->T	7	0	10	0	17	-	0.411765	CDS;gene	rpoB_CDS-N1;rpoB_gene-N1	rpoB:TCA->TTA	rpoB:S815L
Cedrus deodara	93817	G	C->T	6	0	4	0	10	-	0.6	CDS;gene	rpoB_CDS-N1;rpoB_gene-N1	rpoB:TCG->TTG	rpoB:S614L
Cedrus deodara	94798	G	C->T	5	0	2	0	7	-	0.714286	CDS;gene	rpoB_CDS-N1;rpoB_gene-N1	rpoB:TCA->TTA	rpoB:S287L
Cedrus deodara	94843	G	C->T	11	0	1	0	12	-	0.916667	CDS;gene	rpoB_CDS-N1;rpoB_gene-N1	rpoB:CCG->CTG	rpoB:P272L
Cedrus deodara	95113	G	C->T	9	0	1	0	10	-	0.9	CDS;gene	rpoB_CDS-N1;rpoB_gene-N1	rpoB:CCA->CTA	rpoB:P182L
Cedrus deodara	95182	G	C->T	6	0	1	0	7	-	0.857143	CDS;gene	rpoB_CDS-N1;rpoB_gene-N1	rpoB:TCG->TTG	rpoB:S159L
Cedrus deodara	95261	G	C->T	4	0	1	0	5	-	0.8	CDS;gene	rpoB_CDS-N1;rpoB_gene-N1	rpoB:CAT->TAT	rpoB:H133Y
Cedrus deodara	95401	G	C->T	4	0	4	0	8	-	0.5	CDS;gene	rpoB_CDS-N1;rpoB_gene-N1	rpoB:TCG->TTG	rpoB:S86L
Cedrus deodara	97440	G	C->T	15	0	6	0	21	-	0.714286	CDS;gene	psbM_CDS-N1;psbM_gene-N1	psbM:CCT->CTT	psbM:P25L
Cedrus deodara	103097	G	C->T	30	0	2	0	32	-	0.9375	CDS;gene	atpB_CDS-N1;atpB_gene-N1	atpB:CCT->CTT	atpB:P406L
Cedrus deodara	103283	G	C->T	20	0	0	0	20	-	1	CDS;gene	atpB_CDS-N1;atpB_gene-N1	atpB:TCA->TTA	atpB:S344L
Cedrus deodara	109562	C	C->T	0	14	0	40	54	+	0.740741	CDS;gene	ycf4_CDS-N1;ycf4_gene-N1	ycf4:ACG->ATG	ycf4:T130M
Cedrus deodara	109691	C	C->T	0	8	0	23	31	+	0.741935	CDS;gene	ycf4_CDS-N1;ycf4_gene-N1	ycf4:TCA->TTA	ycf4:S173L
Cedrus deodara	112319	C	C->T	0	1	0	38	39	+	0.974359	CDS;gene	petA_CDS-N1;petA_gene-N1	petA:CTT->TTT	petA:L319F
Cedrus deodara	113121	G	C->T	45	0	2	0	47	-	0.957447	CDS;gene	psbL_CDS-N1;psbL_gene-N1	psbL:CCA->CTA	psbL:P31L
Cedrus deodara	114874	C	C->T	0	4	0	20	24	+	0.833333	CDS;gene	petL_CDS-N1;petL_gene-N1	petL:ACG->ATG	petL:T14M
Cedrus deodara	114952	C	C->T	0	2	0	17	19	+	0.894737	CDS;gene	petL_CDS-N1;petL_gene-N1	petL:TCG->TTG	petL:S40L
Cedrus deodara	115143	C	C->T	0	12	0	58	70	+	0.828571	CDS;gene	petG_CDS-N1;petG_gene-N1	petG:CCA->CTA	petG:P6L
Cedrus deodara	115206	C	C->T	0	40	0	59	99	+	0.59596	CDS;gene	petG_CDS-N1;petG_gene-N1	petG:TCA->TTA	petG:S27L
Cedrus deodara	117360	G	C->T	8	0	20	0	28	-	0.285714	CDS;gene	rpl20_CDS-N1;rpl20_gene-N1	rpl20:CCA->CTA	rpl20:P90L
Cedrus deodara	119016	G	C->T	34	0	5	0	39	-	0.871795	CDS;gene	clpP_CDS-N1;clpP_gene-N1	clpP:TCA->TTA	clpP:S65L

## Sheet: Abies firma
Species	Coordinate	Gbase	EditType	Abies.RNA_baseCount A	C	G	T	total	Strand	frequency	TargetedGenomicFeature	TargetedFeatureID	CodonChange	AminoAcidChange
Abies firma	251	G	C->T	131	0	1	0	132	-	0.992424	CDS;gene	psbA_CDS-N1;psbA_gene-N1	psbA:TCA->TTA	psbA:S271L
Abies firma	791	G	C->T	126	0	13	0	139	-	0.906475	CDS;gene	psbA_CDS-N1;psbA_gene-N1	psbA:TCG->TTG	psbA:S91L
Abies firma	1906	G	C->T	7	0	9	0	16	-	0.4375	CDS;gene	matK_CDS-N1;matK_gene-N1	matK:CCC->CTC	matK:P492L
Abies firma	1906	G	C->T	7	0	9	0	16	-	0.4375	gene;intron	trnK-UUU_gene-N1;trnK-UUU_intron-N1	-	-
Abies firma	1915	G	C->T	6	0	10	0	16	-	0.375	CDS;gene	matK_CDS-N1;matK_gene-N1	matK:TCA->TTA	matK:S489L
Abies firma	1915	G	C->T	6	0	10	0	16	-	0.375	gene;intron	trnK-UUU_gene-N1;trnK-UUU_intron-N1	-	-
Abies firma	2398	G	C->T	4	0	4	0	8	-	0.5	CDS;gene	matK_CDS-N1;matK_gene-N1	matK:TCC->TTC	matK:S328F
Abies firma	2398	G	C->T	4	0	4	0	8	-	0.5	gene;intron	trnK-UUU_gene-N1;trnK-UUU_intron-N1	-	-
Abies firma	2474	G	C->T	4	0	2	0	6	-	0.666667	CDS;gene	matK_CDS-N1;matK_gene-N1	matK:CGG->TGG	matK:R303W
Abies firma	2474	G	C->T	4	0	2	0	6	-	0.666667	gene;intron	trnK-UUU_gene-N1;trnK-UUU_intron-N1	-	-
Abies firma	2482	G	C->T	5	0	0	0	5	-	1	CDS;gene	matK_CDS-N1;matK_gene-N1	matK:CCA->CTA	matK:P300L
Abies firma	2482	G	C->T	5	0	0	0	5	-	1	gene;intron	trnK-UUU_gene-N1;trnK-UUU_intron-N1	-	-
Abies firma	2854	G	C->T	11	0	0	0	11	-	1	CDS;gene	matK_CDS-N1;matK_gene-N1	matK:CCA->CTA	matK:P176L
Abies firma	2854	G	C->T	11	0	0	0	11	-	1	gene;intron	trnK-UUU_gene-N1;trnK-UUU_intron-N1	-	-
Abies firma	7117	C	C->T	0	1	0	52	53	+	0.981132	CDS;gene	psbK_CDS-N1;psbK_gene-N1	psbK:TCC->TTT	psbK:S31F
Abies firma	7118	C	C->T	0	45	0	6	51	+	0.117647	CDS;gene	psbK_CDS-N1;psbK_gene-N1	psbK:TCC->TTT	psbK:S31F
Abies firma	7159	C	C->T	0	3	0	37	40	+	0.925	CDS;gene	psbK_CDS-N1;psbK_gene-N1	psbK:TCT->TTT	psbK:S45F
Abies firma	9295	C	C->T	0	0	0	8	8	+	1	CDS;gene	clpP_CDS-N1;clpP_gene-N1	clpP:TCA->TTA	clpP:S65L
Abies firma	10695	C	C->T	0	54	0	3	57	+	0.0526316	CDS;gene	rpl20_CDS-N1;rpl20_gene-N1	rpl20:ACC->ACT	rpl20:T2T
Abies firma	10958	C	C->T	0	11	0	35	46	+	0.76087	CDS;gene	rpl20_CDS-N1;rpl20_gene-N1	rpl20:CCA->CTA	rpl20:P90L
Abies firma	11010	C	C->T	0	4	0	48	52	+	0.923077	CDS;gene	rpl20_CDS-N1;rpl20_gene-N1	rpl20:TCC->TCT	rpl20:S107S
Abies firma	12236	C	G->A	0	9	0	3	12	-	0.25	-	-	-	-
Abies firma	13180	G	C->T	25	0	2	0	27	-	0.925926	CDS;gene	petG_CDS-N1;petG_gene-N1	petG:TCA->TTA	petG:S27L
Abies firma	13243	G	C->T	16	0	1	0	17	-	0.941176	CDS;gene	petG_CDS-N1;petG_gene-N1	petG:CCA->CTA	petG:P6L
Abies firma	13434	G	C->T	5	0	3	0	8	-	0.625	CDS;gene	petL_CDS-N1;petL_gene-N1	petL:TCG->TTG	petL:S38L
Abies firma	13506	G	C->T	10	0	2	0	12	-	0.833333	CDS;gene	petL_CDS-N1;petL_gene-N1	petL:ACG->ATG	petL:T14M
Abies firma	15021	C	C->T	0	0	0	5	5	+	1	CDS;gene	psbE_CDS-N1;psbE_gene-N1	psbE:CCG->TCG	psbE:P72S
Abies firma	25754	C	C->T	0	1	0	7	8	+	0.875	CDS;gene	atpB_CDS-N1;atpB_gene-N1	atpB:CCT->CTT	atpB:P406L
Abies firma	44979	C	C->T	0	1	0	6	7	+	0.857143	CDS;gene	rps2_CDS-N1;rps2_gene-N1	rps2:CCT->CTT	rps2:P115L
Abies firma	45033	C	C->T	0	0	0	5	5	+	1	CDS;gene	rps2_CDS-N1;rps2_gene-N1	rps2:CCT->CTT	rps2:P133L
Abies firma	45297	C	C->T	0	1	0	5	6	+	0.833333	CDS;gene	rps2_CDS-N1;rps2_gene-N1	rps2:TCA->TTA	rps2:S221L
Abies firma	46071	C	C->T	0	0	0	7	7	+	1	CDS;gene	atpI_CDS-N1;atpI_gene-N1	atpI:TCG->TTG	atpI:S143L
Abies firma	46257	C	C->T	0	0	0	7	7	+	1	CDS;gene	atpI_CDS-N1;atpI_gene-N1	atpI:CCT->CTT	atpI:P205L
Abies firma	46266	C	C->T	0	0	0	6	6	+	1	CDS;gene	atpI_CDS-N1;atpI_gene-N1	atpI:CCG->CTG	atpI:P208L
Abies firma	46412	C	C->T	0	12	0	3	15	+	0.2	-	-	-	-
Abies firma	47660	C	C->T	0	6	0	11	17	+	0.647059	CDS;gene	atpF_CDS-N1;atpF_gene-N1	atpF:TCA->TTA	atpF:S22L
Abies firma	47696	C	C->T	0	1	0	11	12	+	0.916667	CDS;gene	atpF_CDS-N1;atpF_gene-N1	atpF:CCA->CTA	atpF:P34L
Abies firma	48747	C	C->T	0	3	0	21	24	+	0.875	CDS;gene	atpF_CDS-N2;atpF_gene-N1	atpF:CCC->TCC	atpF:P124S
Abies firma	48770	C	C->T	0	17	0	5	22	+	0.227273	CDS;gene	atpF_CDS-N2;atpF_gene-N1	atpF:TCC->TCT	atpF:S131S
Abies firma	49529	C	C->T	0	2	0	10	12	+	0.833333	CDS;gene	atpA_CDS-N1;atpA_gene-N1	atpA:CCT->CTT	atpA:P185L
Abies firma	49979	C	C->T	0	0	0	10	10	+	1	CDS;gene	atpA_CDS-N1;atpA_gene-N1	atpA:GCA->GTA	atpA:A335V
Abies firma	54543	C	C->T	0	1	0	37	38	+	0.973684	CDS;gene	psbB_CDS-N1;psbB_gene-N1	psbB:TCT->TTT	psbB:S464F
Abies firma	56912	C	C->T	0	1	0	34	35	+	0.971429	CDS;gene	petB_CDS-N2;petB_gene-N1	petB:CCA->CTA	petB:P149L
Abies firma	56947	C	C->T	0	0	0	35	35	+	1	CDS;gene	petB_CDS-N2;petB_gene-N1	petB:CCA->TCA	petB:P161S
Abies firma	58199	C	C->T	0	0	0	14	14	+	1	CDS;gene	petD_CDS-N2;petD_gene-N1	petD:TCA->TTA	petD:S103L
Abies firma	58274	C	C->T	0	1	0	26	27	+	0.962963	CDS;gene	petD_CDS-N2;petD_gene-N1	petD:TCC->TTC	petD:S128F
Abies firma	58357	C	C->T	0	0	0	10	10	+	1	CDS;gene	petD_CDS-N2;petD_gene-N1	petD:CAA->TAA	petD:Q156U
Abies firma	59519	G	C->T	5	0	2	0	7	-	0.714286	CDS;gene	rpoA_CDS-N1;rpoA_gene-N1	rpoA:CTA->TTA	rpoA:L34L
Abies firma	60894	G	C->T	8	0	7	0	15	-	0.533333	CDS;gene	rps8_CDS-N1;rps8_gene-N1	rps8:TCG->TTG	rps8:S85L
Abies firma	60918	G	C->T	11	0	5	0	16	-	0.6875	CDS;gene	rps8_CDS-N1;rps8_gene-N1	rps8:TCA->TTA	rps8:S77L
Abies firma	60960	G	C->T	7	0	11	0	18	-	0.388889	CDS;gene	rps8_CDS-N1;rps8_gene-N1	rps8:TCA->TTA	rps8:S63L
Abies firma	60966	G	C->T	5	0	12	0	17	-	0.294118	CDS;gene	rps8_CDS-N1;rps8_gene-N1	rps8:TCG->TTG	rps8:S61L
Abies firma	61566	G	C->T	5	0	19	0	24	-	0.208333	CDS;gene	rpl14_CDS-N1;rpl14_gene-N1	rpl14:TCC->TCT	rpl14:S32S
Abies firma	62825	C	G->A	0	48	0	6	54	-	0.111111	gene;intron	rpl16_gene-N1;rpl16_intron-N1	-	-
Abies firma	64490	G	C->T	136	0	70	0	206	-	0.660194	CDS;gene	rps19_CDS-N1;rps19_gene-N1	rps19:TCA->TTA	rps19:S15L
Abies firma	64904	G	C->T	100	0	11	0	111	-	0.900901	CDS;gene	rpl2_CDS-N2;rpl2_gene-N1	rpl2:TCG->TTG	rpl2:S172L
Abies firma	65885	G	C->T	186	0	100	1	287	-	0.65035	CDS;gene	rpl2_CDS-N1;rpl2_gene-N1	rpl2:TCT->TTT	rpl2:S68F
Abies firma	66323	G	C->T	366	0	320	1	687	-	0.533528	CDS;gene	rpl23_CDS-N1;rpl23_gene-N1	rpl23:CAA->TAA	rpl23:Q21U
Abies firma	72088	C	C->T	0	1	0	10	11	+	0.909091	CDS;gene	ycf3_CDS-N2;ycf3_gene-N1	ycf3:CCG->CTG	ycf3:P65L
Abies firma	72549	C	C->T	0	1	0	6	7	+	0.857143	gene;intron	ycf3_gene-N1;ycf3_intron-N2	-	-
Abies firma	75109	C	C->T	0	0	0	6	6	+	1	CDS;gene	psaA_CDS-N1;psaA_gene-N1	psaA:CCA->CTA	psaA:P462L
Abies firma	76856	C	C->T	0	0	0	7	7	+	1	CDS;gene	psaB_CDS-N1;psaB_gene-N1	psaB:TCA->TTA	psaB:S285L
Abies firma	78502	C	C->T	0	8	0	29	37	+	0.783784	CDS;gene	rps14_CDS-N1;rps14_gene-N1	rps14:TCA->TTA	rps14:S49L
Abies firma	79339	G	C->T	53	0	1	0	54	-	0.981481	CDS;gene	psbZ_CDS-N1;psbZ_gene-N1	psbZ:CAG->TAG	psbZ:Q63U
Abies firma	79377	G	C->T	44	0	27	0	71	-	0.619718	CDS;gene	psbZ_CDS-N1;psbZ_gene-N1	psbZ:TCA->TTA	psbZ:S50L
Abies firma	79470	G	C->T	48	0	19	0	67	-	0.716418	CDS;gene	psbZ_CDS-N1;psbZ_gene-N1	psbZ:CCA->CTA	psbZ:P19L
Abies firma	79506	G	C->T	29	0	25	0	54	-	0.537037	CDS;gene	psbZ_CDS-N1;psbZ_gene-N1	psbZ:TCA->TTA	psbZ:S7L
Abies firma	80265	G	C->T	33	0	0	0	33	-	1	CDS;gene	psbC_CDS-N1;psbC_gene-N1	psbC:TCA->TTA	psbC:S404L
Abies firma	81550	G	C->T	39	0	0	0	39	-	1	CDS;gene	psbD_CDS-N1;psbD_gene-N1	psbD:TCT->TTT	psbD:S312F
Abies firma	90541	C	C->T	0	28	0	3	31	-	0.0967742	gene;rRNA	rrn23_gene-N1;rrn23_rRNA-N1	-	-
Abies firma	90673	G	G->A	477	0	733	1	1211	+	0.394215	gene;rRNA	rrn23_gene-N1;rrn23_rRNA-N1	-	-
Abies firma	93608	G	G->A	35	0	0	0	35	-	1	CDS;gene	chlL_CDS-N1;chlL_gene-N1	chlL:AAG->AAA	chlL:K215K
Abies firma	105484	G	C->T	7	0	3	0	10	-	0.7	CDS;gene	ccsA_CDS-N1;ccsA_gene-N1	ccsA:CGT->TGT	ccsA:R301C
Abies firma	105498	G	C->T	8	0	2	0	10	-	0.8	CDS;gene	ccsA_CDS-N1;ccsA_gene-N1	ccsA:TCT->TTT	ccsA:S296F
Abies firma	105669	G	C->T	6	0	3	0	9	-	0.666667	CDS;gene	ccsA_CDS-N1;ccsA_gene-N1	ccsA:ACT->ATT	ccsA:T239I
Abies firma	105681	G	C->T	5	0	4	0	9	-	0.555556	CDS;gene	ccsA_CDS-N1;ccsA_gene-N1	ccsA:TCA->TTA	ccsA:S235L
Abies firma	105696	G	C->T	5	0	2	0	7	-	0.714286	CDS;gene	ccsA_CDS-N1;ccsA_gene-N1	ccsA:CCC->CTC	ccsA:P230L
Abies firma	105978	G	C->T	4	0	1	0	5	-	0.8	CDS;gene	ccsA_CDS-N1;ccsA_gene-N1	ccsA:TCA->TTA	ccsA:S136L
Abies firma	107975	G	C->T	20	0	2	0	22	-	0.909091	CDS;gene	rpl32_CDS-N1;rpl32_gene-N1	rpl32:CGG->TGG	rpl32:R20W
Abies firma	110399	C	C->T	0	1	0	5	6	+	0.833333	-	-	-	-
Abies firma	110895	C	C->T	0	2	0	6	8	+	0.75	gene;intron	rps12_gene-N2;rps12_intron-N1	-	-

## Sheet: Picea smithiana
Species	Coordinate	Gbase	EditType	Picea.RNA_baseCount A	C	G	T	total	Strand	Frequency	TargetedGenomicFeature	TargetedFeatureID	CodonChange	AminoAcidChange
Picea smithiana	954	C	C->T	0	125	0	169	294	+	0.57483	CDS;gene	psbA_CDS-N1;psbA_gene-N1	psbA:GCC->GCT	psbA:A318A
Picea smithiana	2410	C	C->T	0	8	0	6	14	+	0.428571	CDS;gene	ycf2_gene-N1;ycf2_CDS-N1	ycf2:TCG->TTG	ycf2:S190L
Picea smithiana	5704	C	C->T	0	3	0	4	7	+	0.571429	CDS;gene	ycf2_gene-N1;ycf2_CDS-N1	ycf2:CCT->CTT	ycf2:P1288L
Picea smithiana	6474	C	C->T	0	1	0	11	12	+	0.916667	CDS;gene	ycf2_gene-N1;ycf2_CDS-N1	ycf2:CCG->TCG	ycf2:P1545S
Picea smithiana	6757	C	C->T	0	1	0	4	5	+	0.8	CDS;gene	ycf2_gene-N1;ycf2_CDS-N1	ycf2:TCA->TTA	ycf2:S1639L
Picea smithiana	11341	G	C->T	6	0	81	0	87	-	0.0689655	gene;intron	rps12_gene-N2;rps12_intron-N1	-	-
Picea smithiana	11400	G	C->T	64	0	22	0	86	-	0.744186	gene;intron	rps12_gene-N2;rps12_intron-N1	-	-
Picea smithiana	11407	G	C->T	72	0	5	0	77	-	0.935065	gene;intron	rps12_gene-N2;rps12_intron-N1	-	-
Picea smithiana	11923	G	C->T	6	0	48	0	54	-	0.111111	-	-	-	-
Picea smithiana	12897	G	C->T	3	0	35	0	38	-	0.0789474	-	-	-	-
Picea smithiana	16753	C	C->T	0	1	0	7	8	+	0.875	CDS;gene	ccsA_CDS-N1;ccsA_gene-N1	ccsA:TCA->TTA	ccsA:S136L
Picea smithiana	17035	C	C->T	0	0	0	4	4	+	1	CDS;gene	ccsA_CDS-N1;ccsA_gene-N1	ccsA:CCC->CTC	ccsA:P230L
Picea smithiana	19337	G	C->T	51	0	3	0	54	-	0.944444	CDS;gene	psaC_CDS-N1;psaC_gene-N1	psaC:GCA->GTA	psaC:A49V
Picea smithiana	20101	G	C->T	5	0	24	0	29	-	0.172414	-	-	-	-
Picea smithiana	21294	G	C->T	10	0	113	0	123	-	0.0813008	-	-	-	-
Picea smithiana	21910	G	C->T	76	0	253	0	329	-	0.231003	CDS;gene	ycf1_CDS-N1;ycf1_gene-N1	ycf1:CCC->CCT	ycf1:P1603P
Picea smithiana	22901	G	C->T	10	0	147	0	157	-	0.0636943	CDS;gene	ycf1_CDS-N1;ycf1_gene-N1	ycf1:CCA->CTA	ycf1:P1273L
Picea smithiana	23091	G	C->T	7	0	112	0	119	-	0.0588235	CDS;gene	ycf1_CDS-N1;ycf1_gene-N1	ycf1:CTC->TTC	ycf1:L1210F
Picea smithiana	23188	G	C->T	46	0	50	0	96	-	0.479167	CDS;gene	ycf1_CDS-N1;ycf1_gene-N1	ycf1:CTC->CTT	ycf1:L1177L
Picea smithiana	26801	G	C->T	6	0	1	0	7	-	0.857143	-	-	-	-
Picea smithiana	32389	C	G->A	0	43	0	15	58	-	0.258621	gene;rRNA	rrn23_gene-N1;rrn23_rRNA-N1	-	-
Picea smithiana	32874	G	C->T	9	0	156	0	165	-	0.0545455	gene;rRNA	rrn23_gene-N1;rrn23_rRNA-N1	-	-
Picea smithiana	37233	G	C->T	16	0	263	0	279	-	0.0573477	-	-	-	-
Picea smithiana	39702	C	C->T	0	3234	0	225	3459	+	0.0650477	-	-	-	-
Picea smithiana	39983	G	C->T	5	0	70	0	75	-	0.0666667	-	-	-	-
Picea smithiana	40272	C	C->T	0	1551	0	394	1945	+	0.202571	-	-	-	-
Picea smithiana	41038	C	C->T	0	6	0	639	645	+	0.990698	CDS;gene	psbD_CDS-N1;psbD_gene-N1	psbD:CCT->TCT	psbD:P156S
Picea smithiana	41385	C	C->T	0	536	0	34	570	+	0.0596491	CDS;gene	psbD_CDS-N1;psbD_gene-N1	psbD:TTC->TTT	psbD:F271F
Picea smithiana	41411	C	C->T	0	4	0	545	549	+	0.992714	CDS;gene	psbD_CDS-N1;psbD_gene-N1	psbD:TCA->TTA	psbD:S280L
Picea smithiana	41507	C	C->T	0	1	0	554	555	+	0.998198	CDS;gene	psbD_CDS-N1;psbD_gene-N1	psbD:TCT->TTT	psbD:S312F
Picea smithiana	42105	C	C->T	0	25	0	398	423	+	0.940898	CDS;gene	psbC_CDS-N1;psbC_gene-N1	psbC:CCA->CTA	psbC:P175L
Picea smithiana	42792	C	C->T	0	9	0	380	389	+	0.976864	CDS;gene	psbC_CDS-N1;psbC_gene-N1	psbC:TCA->TTA	psbC:S404L
Picea smithiana	42879	C	C->T	0	8	0	288	296	+	0.972973	CDS;gene	psbC_CDS-N1;psbC_gene-N1	psbC:CCA->CTA	psbC:P433L
Picea smithiana	43595	C	C->T	0	99	0	220	319	+	0.689655	CDS;gene	psbZ_CDS-N1;psbZ_gene-N1	psbZ:TCG->TTG	psbZ:S7L
Picea smithiana	43724	C	C->T	0	435	0	99	534	+	0.185393	CDS;gene	psbZ_CDS-N1;psbZ_gene-N1	psbZ:TCA->TTA	psbZ:S50L
Picea smithiana	43762	C	C->T	0	5	0	403	408	+	0.987745	CDS;gene	psbZ_CDS-N1;psbZ_gene-N1	psbZ:CAG->TAG	psbZ:Q63U
Picea smithiana	43927	G	C->T	5	0	36	0	41	-	0.121951	-	-	-	-
Picea smithiana	44586	G	C->T	197	0	22	0	219	-	0.899543	CDS;gene	rps14_CDS-N1;rps14_gene-N1	rps14:TCA->TTA	rps14:S49L
Picea smithiana	44780	G	C->T	22	0	121	0	143	-	0.153846	-	-	-	-
Picea smithiana	46232	G	C->T	20	0	1	0	21	-	0.952381	CDS;gene	psaB_CDS-N1;psaB_gene-N1	psaB:TCA->TTA	psaB:S285L
Picea smithiana	47979	G	C->T	34	0	4	0	38	-	0.894737	CDS;gene	psaA_CDS-N1;psaA_gene-N1	psaA:CCA->CTA	psaA:P462L
Picea smithiana	48159	G	C->T	3	0	37	0	40	-	0.075	CDS;gene	psaA_CDS-N1;psaA_gene-N1	psaA:GCT->GTT	psaA:A402V
Picea smithiana	49076	G	C->T	13	0	75	0	88	-	0.147727	CDS;gene	psaA_CDS-N1;psaA_gene-N1	psaA:TCC->TCT	psaA:S96S
Picea smithiana	50557	G	C->T	17	0	4	0	21	-	0.809524	gene;intron	ycf3_gene-N1;ycf3_intron-N2	-	-
Picea smithiana	57685	C	C->T	0	395	0	455	850	+	0.535294	CDS;gene	rpl23_CDS-N1;rpl23_gene-N1	rpl23:CAA->TAA	rpl23:Q21U
Picea smithiana	59013	C	C->T	0	458	0	40	498	+	0.0803213	CDS;gene	rpl2_CDS-N2;rpl2_gene-N1	rpl2:CCC->TCC	rpl2:P137S
Picea smithiana	59119	C	C->T	0	42	0	389	431	+	0.902552	CDS;gene	rpl2_CDS-N2;rpl2_gene-N1	rpl2:TCG->TTG	rpl2:S172L
Picea smithiana	59531	C	C->T	0	224	0	652	876	+	0.744292	CDS;gene	rps19_CDS-N1;rps19_gene-N1	rps19:TCA->TTA	rps19:S15L
Picea smithiana	62257	C	C->T	0	15	0	7	22	+	0.318182	-	-	-	-
Picea smithiana	62357	C	C->T	0	25	0	5	30	+	0.166667	CDS;gene	rpl14_CDS-N1;rpl14_gene-N1	rpl14:CAG->TAG	rpl14:Q3U
Picea smithiana	63044	C	C->T	0	13	0	3	16	+	0.1875	CDS;gene	rps8_CDS-N1;rps8_gene-N1	rps8:ATC->ATT	rps8:I60I
Picea smithiana	63046	C	C->T	0	5	0	11	16	+	0.6875	CDS;gene	rps8_CDS-N1;rps8_gene-N1	rps8:TCG->TTG	rps8:S61L
Picea smithiana	63094	C	C->T	0	0	0	13	13	+	1	CDS;gene	rps8_CDS-N1;rps8_gene-N1	rps8:TCA->TTA	rps8:S77L
Picea smithiana	64821	C	C->T	0	0	0	10	10	+	1	CDS;gene	rpoA_CDS-N1;rpoA_gene-N1	rpoA:TCT->TTT	rpoA:S145F
Picea smithiana	65385	C	C->T	0	5	0	9	14	+	0.642857	CDS;gene	rpoA_CDS-N1;rpoA_gene-N1	rpoA:CCA->CTA	rpoA:P333L
Picea smithiana	65563	G	C->T	34	0	2	0	36	-	0.944444	CDS;gene	petD_CDS-N2;petD_gene-N1	petD:CAA->TAA	petD:Q161U
Picea smithiana	65646	G	C->T	40	0	2	0	42	-	0.952381	CDS;gene	petD_CDS-N2;petD_gene-N1	petD:TCC->TTC	petD:S133F
Picea smithiana	65721	G	C->T	21	0	6	0	27	-	0.777778	CDS;gene	petD_CDS-N2;petD_gene-N1	petD:TCA->TTA	petD:S108L
Picea smithiana	65934	G	C->T	34	0	2	0	36	-	0.944444	CDS;gene	petD_CDS-N2;petD_gene-N1	petD:TCA->TTA	petD:S37L
Picea smithiana	66970	G	C->T	35	0	0	0	35	-	1	CDS;gene	petB_CDS-N2;petB_gene-N1	petB:CCA->TCA	petB:P212S
Picea smithiana	66994	G	C->T	5	0	33	0	38	-	0.131579	CDS;gene	petB_CDS-N2;petB_gene-N1	petB:CTA->TTA	petB:L204L
Picea smithiana	67005	G	C->T	37	0	2	0	39	-	0.948718	CDS;gene	petB_CDS-N2;petB_gene-N1	petB:CCA->CTA	petB:P200L
Picea smithiana	67449	G	C->T	24	0	0	0	24	-	1	CDS;gene	petB_CDS-N2;petB_gene-N1	petB:TCT->TTT	petB:S52F
Picea smithiana	67585	G	C->T	34	0	0	0	34	-	1	CDS;gene	petB_CDS-N2;petB_gene-N1	petB:CGG->TGG	petB:R7W
Picea smithiana	68098	G	C->T	14	0	10	0	24	-	0.583333	gene;intron	petB_gene-N1;petB_intron-N1	-	-
Picea smithiana	68719	C	G->A	0	3	0	8	11	-	0.727273	CDS;gene	psbH_CDS-N1;psbH_gene-N1	psbH:GGA->AGA	psbH:G20R
Picea smithiana	68726	G	C->T	9	0	3	0	12	-	0.75	CDS;gene	psbH_CDS-N1;psbH_gene-N1	psbH:ACC->ACT	psbH:T17T
Picea smithiana	68738	C	G->A	0	3	0	8	11	-	0.727273	CDS;gene	psbH_CDS-N1;psbH_gene-N1	psbH:ACG->ACA	psbH:T13T
Picea smithiana	69387	G	C->T	47	0	1	0	48	-	0.979167	CDS;gene	psbB_CDS-N1;psbB_gene-N1	psbB:TCT->TTT	psbB:S464F
Picea smithiana	69469	G	C->T	24	0	47	0	71	-	0.338028	CDS;gene	psbB_CDS-N1;psbB_gene-N1	psbB:CTA->TTA	psbB:L437L
Picea smithiana	72194	C	C->T	0	7	0	48	55	+	0.872727	CDS;gene	clpP_CDS-N1;clpP_gene-N1	clpP:TCA->TTA	clpP:S65L
Picea smithiana	73857	C	C->T	0	4	0	5	9	+	0.555556	CDS;gene	rpl20_CDS-N1;rpl20_gene-N1	rpl20:CCA->CTA	rpl20:P90L
Picea smithiana	73909	C	C->T	0	6	0	6	12	+	0.5	CDS;gene	rpl20_CDS-N1;rpl20_gene-N1	rpl20:TCC->TCT	rpl20:S107S
Picea smithiana	74242	G	C->T	15	0	2	0	17	-	0.882353	CDS;gene	rps18_CDS-N1;rps18_gene-N1	rps18:CCA->CTA	rps18:P83L
Picea smithiana	74677	G	C->T	21	0	0	0	21	-	1	CDS;gene	rpl33_CDS-N1;rpl33_gene-N1	rpl33:TCA->TTA	rpl33:S48L
Picea smithiana	75215	G	C->T	17	0	13	0	30	-	0.566667	CDS;gene	psaJ_CDS-N1;psaJ_gene-N1	psaJ:TCA->TTA	psaJ:S17L
Picea smithiana	75366	G	C->T	17	0	3	0	20	-	0.85	-	-	-	-
Picea smithiana	76033	G	C->T	13	0	3	0	16	-	0.8125	CDS;gene	petG_CDS-N1;petG_gene-N1	petG:TCA->TTA	petG:S27L
Picea smithiana	76048	G	C->T	17	0	0	0	17	-	1	CDS;gene	petG_CDS-N1;petG_gene-N1	petG:TCC->TTC	petG:S22F
Picea smithiana	76096	G	C->T	14	0	3	0	17	-	0.823529	CDS;gene	petG_CDS-N1;petG_gene-N1	petG:CCA->CTA	petG:P6L
Picea smithiana	77595	C	C->T	0	5	0	28	33	+	0.848485	-	-	-	-
Picea smithiana	78011	C	C->T	0	1	0	24	25	+	0.96	CDS;gene	psbF_CDS-N1;psbF_gene-N1	psbF:TCG->TTG	psbF:S28L
Picea smithiana	78423	C	C->T	0	1	0	86	87	+	0.988506	CDS;gene	psbJ_CDS-N1;psbJ_gene-N1	psbJ:TCA->TTA	psbJ:S36L
Picea smithiana	79486	G	C->T	19	0	2	0	21	-	0.904762	CDS;gene	petA_CDS-N1;petA_gene-N1	petA:CAG->TAG	petA:Q320U
Picea smithiana	79489	G	C->T	19	0	0	0	19	-	1	CDS;gene	petA_CDS-N1;petA_gene-N1	petA:CTT->TTT	petA:L319F
Picea smithiana	80902	G	C->T	8	0	16	0	24	-	0.333333	CDS;gene	cemA_CDS-N1;cemA_gene-N1	cemA:CTC->TTC	cemA:L185F
Picea smithiana	81339	G	C->T	5	0	30	0	35	-	0.142857	CDS;gene	cemA_CDS-N1;cemA_gene-N1	cemA:TCA->TTA	cemA:S39L
Picea smithiana	82327	G	C->T	7	0	1	0	8	-	0.875	CDS;gene	ycf4_CDS-N1;ycf4_gene-N1	ycf4:TCA->TTA	ycf4:S173L
Picea smithiana	83452	G	C->T	12	0	0	0	12	-	1	CDS;gene	psaI_CDS-N1;psaI_gene-N1	psaI:CAT->TAT	psaI:H27Y
Picea smithiana	83674	C	C->T	0	34	0	12	46	+	0.26087	-	-	-	-
Picea smithiana	84767	G	C->T	24	0	4	0	28	-	0.857143	CDS;gene	accD_CDS-N1;accD_gene-N1	accD:CGG->TGG	accD:R94W
Picea smithiana	84784	G	C->T	26	0	3	0	29	-	0.896552	CDS;gene	accD_CDS-N1;accD_gene-N1	accD:CCA->CTA	accD:P88L
Picea smithiana	89033	C	C->T	0	0	0	15	15	+	1	CDS;gene	atpB_CDS-N1;atpB_gene-N1	atpB:CCT->CTT	atpB:P406L
Picea smithiana	89659	C	C->T	0	1	0	6	7	+	0.857143	CDS;gene	atpE_CDS-N1;atpE_gene-N1	atpE:CCG->CTG	atpE:P119L
Picea smithiana	92335	G	C->T	3	0	19	0	22	-	0.136364	-	-	-	-
Picea smithiana	92388	G	C->T	3	0	21	0	24	-	0.125	-	-	-	-
Picea smithiana	94899	C	C->T	0	1930	0	307	2237	+	0.137237	CDS;gene	psaM_CDS-N1;psaM_gene-N1	psaM:CAA->TAA	psaM:Q6U
Picea smithiana	94930	C	C->T	0	1958	0	133	2091	+	0.0636059	CDS;gene	psaM_CDS-N1;psaM_gene-N1	psaM:GCA->GTA	psaM:A16V
Picea smithiana	96649	G	C->T	9	0	5	0	14	-	0.642857	-	-	-	-
Picea smithiana	96771	G	C->T	6	0	4	0	10	-	0.6	-	-	-	-
Picea smithiana	97295	C	C->T	0	0	0	25	25	+	1	CDS;gene	psbM_CDS-N1;psbM_gene-N1	psbM:CCT->CTT	psbM:P25L
Picea smithiana	99272	C	C->T	0	0	0	3	3	+	1	CDS;gene	rpoB_CDS-N1;rpoB_gene-N1	rpoB:TCC->TTC	rpoB:S50F
Picea smithiana	99599	C	C->T	0	1	0	4	5	+	0.8	CDS;gene	rpoB_CDS-N1;rpoB_gene-N1	rpoB:TCG->TTG	rpoB:S159L
Picea smithiana	99938	C	C->T	0	1	0	3	4	+	0.75	CDS;gene	rpoB_CDS-N1;rpoB_gene-N1	rpoB:CCG->CTG	rpoB:P272L
Picea smithiana	101753	C	C->T	0	0	0	9	9	+	1	CDS;gene	rpoB_CDS-N1;rpoB_gene-N1	rpoB:CCC->CTT	rpoB:P877L
Picea smithiana	101754	C	C->T	0	0	0	9	9	+	1	CDS;gene	rpoB_CDS-N1;rpoB_gene-N1	rpoB:CCC->CTT	rpoB:P877L
Picea smithiana	101845	C	C->T	0	0	0	7	7	+	1	CDS;gene	rpoB_CDS-N1;rpoB_gene-N1	rpoB:CCT->TCT	rpoB:P908S
Picea smithiana	101984	C	C->T	0	0	0	3	3	+	1	CDS;gene	rpoB_CDS-N1;rpoB_gene-N1	rpoB:TCG->TTG	rpoB:S954L
Picea smithiana	102540	C	C->T	0	0	0	7	7	+	1	CDS;gene	rpoC1_CDS-N1;rpoC1_gene-N1	rpoC1:TCG->TTG	rpoC1:S55L
Picea smithiana	102795	C	C->T	0	4	0	14	18	+	0.777778	CDS;gene	rpoC1_CDS-N1;rpoC1_gene-N1	rpoC1:CCA->CTA	rpoC1:P140L
Picea smithiana	102975	C	C->T	0	1	0	7	8	+	0.875	gene;intron	rpoC1_gene-N1;rpoc1_intron-N1	-	-
Picea smithiana	103532	C	C->T	0	3	0	7	10	+	0.7	CDS;gene	rpoC1_CDS-N2;rpoC1_gene-N1	rpoC1:TCA->TTA	rpoC1:S160L
Picea smithiana	103928	C	C->T	0	7	0	10	17	+	0.588235	CDS;gene	rpoC1_CDS-N2;rpoC1_gene-N1	rpoC1:CCG->CTG	rpoC1:P292L
Picea smithiana	104198	C	C->T	0	0	0	6	6	+	1	CDS;gene	rpoC1_CDS-N2;rpoC1_gene-N1	rpoC1:TCT->TTT	rpoC1:S382F
Picea smithiana	104531	C	C->T	0	3	0	3	6	+	0.5	CDS;gene	rpoC1_CDS-N2;rpoC1_gene-N1	rpoC1:TCA->TTA	rpoC1:S493L
Picea smithiana	104540	C	C->T	0	4	0	3	7	+	0.428571	CDS;gene	rpoC1_CDS-N2;rpoC1_gene-N1	rpoC1:TCG->TTG	rpoC1:S496L
Picea smithiana	107844	G	G->A	11	0	0	0	11	-	1	CDS;gene	rpoC2_CDS-N1;rpoC2_gene-N1	rpoC2:ACG->ACA	rpoC2:T869T
Picea smithiana	107859	C	C->T	0	0	0	11	11	-	1	CDS;gene	rpoC2_CDS-N1;rpoC2_gene-N1	rpoC2:TTC->TTT	rpoC2:F874F
Picea smithiana	107954	C	C->T	0	0	0	3	3	+	1	CDS;gene	rpoC2_CDS-N1;rpoC2_gene-N1	rpoC2:CCT->CTT	rpoC2:P906L
Picea smithiana	108206	C	C->T	0	9	0	20	29	+	0.689655	CDS;gene	rpoC2_CDS-N1;rpoC2_gene-N1	rpoC2:TCA->TTA	rpoC2:S990L
Picea smithiana	108479	C	C->T	0	1	0	14	15	+	0.933333	CDS;gene	rpoC2_CDS-N1;rpoC2_gene-N1	rpoC2:TCA->TTA	rpoC2:S1081L
Picea smithiana	109440	C	C->T	0	3	0	19	22	+	0.863636	CDS;gene	rps2_CDS-N1;rps2_gene-N1	rps2:CCT->CTT	rps2:P115L
Picea smithiana	109494	C	C->T	0	1	0	29	30	+	0.966667	CDS;gene	rps2_CDS-N1;rps2_gene-N1	rps2:CCT->CTT	rps2:P133L
Picea smithiana	109758	C	C->T	0	0	0	26	26	+	1	CDS;gene	rps2_CDS-N1;rps2_gene-N1	rps2:TCA->TTA	rps2:S221L
Picea smithiana	109890	C	C->T	0	31	0	15	46	+	0.326087	-	-	-	-
Picea smithiana	110668	C	C->T	0	0	0	10	10	+	1	CDS;gene	atpI_CDS-N1;atpI_gene-N1	atpI:TCT->TTT	atpI:S192F
Picea smithiana	110707	C	C->T	0	0	0	8	8	+	1	CDS;gene	atpI_CDS-N1;atpI_gene-N1	atpI:CCT->CTT	atpI:P205L
Picea smithiana	110716	C	C->T	0	1	0	5	6	+	0.833333	CDS;gene	atpI_CDS-N1;atpI_gene-N1	atpI:CCG->CTG	atpI:P208L
Picea smithiana	110725	C	C->T	0	0	0	5	5	+	1	CDS;gene	atpI_CDS-N1;atpI_gene-N1	atpI:TCA->TTA	atpI:S211L
Picea smithiana	110917	C	C->T	0	15	0	3	18	+	0.166667	-	-	-	-
Picea smithiana	112169	C	C->T	0	2	0	10	12	+	0.833333	CDS;gene	atpF_CDS-N1;atpF_gene-N1	atpF:TCA->TTA	atpF:S22L
Picea smithiana	112205	C	C->T	0	0	0	8	8	+	1	CDS;gene	atpF_CDS-N1;atpF_gene-N1	atpF:CCA->CTA	atpF:P34L
Picea smithiana	113249	C	C->T	0	5	0	44	49	+	0.897959	CDS;gene	atpF_CDS-N2;atpF_gene-N1	atpF:CCC->TCC	atpF:P124S
Picea smithiana	114031	C	C->T	0	2	0	16	18	+	0.888889	CDS;gene	atpA_CDS-N1;atpA_gene-N1	atpA:CCT->CTT	atpA:P185L
Picea smithiana	114250	C	C->T	0	3	0	16	19	+	0.842105	CDS;gene	atpA_CDS-N1;atpA_gene-N1	atpA:TCA->TTA	atpA:S258L
Picea smithiana	114481	C	C->T	0	1	0	22	23	+	0.956522	CDS;gene	atpA_CDS-N1;atpA_gene-N1	atpA:GCA->GTA	atpA:A335V
Picea smithiana	114511	C	C->T	0	1	0	20	21	+	0.952381	CDS;gene	atpA_CDS-N1;atpA_gene-N1	atpA:TCA->TTA	atpA:S345L
Picea smithiana	116817	G	C->T	28	0	203	0	231	-	0.121212	-	-	-	-
Picea smithiana	117395	G	C->T	5	0	89	0	94	-	0.0531915	-	-	-	-
Picea smithiana	117479	G	C->T	12	0	79	0	91	-	0.131868	-	-	-	-
Picea smithiana	117506	G	C->T	41	0	59	0	100	-	0.41	-	-	-	-
Picea smithiana	117529	G	C->T	43	0	63	0	106	-	0.40566	-	-	-	-
Picea smithiana	117775	G	C->T	97	0	3	0	100	-	0.97	CDS;gene	psbK_CDS-N1;psbK_gene-N1	psbK:TCT->TTT	psbK:S45F
Picea smithiana	117816	G	C->T	5	0	59	0	64	-	0.078125	CDS;gene	psbK_CDS-N1;psbK_gene-N1	psbK:TCC->TTT	psbK:S31F
Picea smithiana	117817	G	C->T	61	0	1	0	62	-	0.983871	CDS;gene	psbK_CDS-N1;psbK_gene-N1	psbK:TCC->TTT	psbK:S31F
Picea smithiana	118553	C	C->T	0	3	0	3	6	+	0.5	CDS;gene	chlB_CDS-N1;chlB_gene-N1	chlB:CAT->TAT	chlB:H5Y
Picea smithiana	118828	C	C->T	0	18	0	19	37	+	0.513514	CDS;gene	chlB_CDS-N1;chlB_gene-N1	chlB:ACC->ACT	chlB:T96T
Picea smithiana	119186	C	C->T	0	5	0	15	20	+	0.75	CDS;gene	chlB_CDS-N1;chlB_gene-N1	chlB:CGG->TGG	chlB:R216W
Picea smithiana	120112	C	C->T	0	27	0	7	34	+	0.205882	-	-	-	-
Picea smithiana	122129	C	C->T	0	26	0	13	39	+	0.333333	CDS;gene	matK_CDS-N1;matK_gene-N1	matK:TCA->TTA	matK:S147L
Picea smithiana	122129	C	C->T	0	26	0	13	39	+	0.333333	gene;intron	trnK_gene-N1;trnK_intron-N1	-	-
Picea smithiana	122216	C	C->T	0	5	0	16	21	+	0.761905	CDS;gene	matK_CDS-N1;matK_gene-N1	matK:CCA->CTA	matK:P176L
Picea smithiana	122216	C	C->T	0	5	0	16	21	+	0.761905	gene;intron	trnK_gene-N1;trnK_intron-N1	-	-
Picea smithiana	122588	C	C->T	0	5	0	20	25	+	0.8	CDS;gene	matK_CDS-N1;matK_gene-N1	matK:CCA->CTA	matK:P300L
Picea smithiana	122588	C	C->T	0	5	0	20	25	+	0.8	gene;intron	trnK_gene-N1;trnK_intron-N1	-	-
Picea smithiana	122596	C	C->T	0	1	0	21	22	+	0.954545	CDS;gene	matK_CDS-N1;matK_gene-N1	matK:CGG->TGG	matK:R303W
Picea smithiana	122596	C	C->T	0	1	0	21	22	+	0.954545	gene;intron	trnK_gene-N1;trnK_intron-N1	-	-
Picea smithiana	122672	C	C->T	0	12	0	3	15	+	0.2	CDS;gene	matK_CDS-N1;matK_gene-N1	matK:TCT->TTT	matK:S328F
Picea smithiana	122672	C	C->T	0	12	0	3	15	+	0.2	gene;intron	trnK_gene-N1;trnK_intron-N1	-	-
Picea smithiana	123053	C	C->T	0	57	0	16	73	+	0.219178	CDS;gene	matK_CDS-N1;matK_gene-N1	matK:CCA->CTA	matK:P455L
Picea smithiana	123053	C	C->T	0	57	0	16	73	+	0.219178	gene;intron	trnK_gene-N1;trnK_intron-N1	-	-
Picea smithiana	123155	C	C->T	0	12	0	51	63	+	0.809524	CDS;gene	matK_CDS-N1;matK_gene-N1	matK:TCA->TTA	matK:S489L
Picea smithiana	123155	C	C->T	0	12	0	51	63	+	0.809524	gene;intron	trnK_gene-N1;trnK_intron-N1	-	-
Picea smithiana	123164	C	C->T	0	36	0	26	62	+	0.419355	CDS;gene	matK_CDS-N1;matK_gene-N1	matK:CCC->CTC	matK:P492L
Picea smithiana	123164	C	C->T	0	36	0	26	62	+	0.419355	gene;intron	trnK_gene-N1;trnK_intron-N1	-	-

## Sheet: Pinus armandii
Species	Coordinate	Gbase	EditType	Pinus.RNA_baseCount A	C	G	T	total	Strand	frequency	TargetedGenomicFeature	TargetedFeatureID	CodonChange	AminoAcidChange
Pinus armandii	11726	G	C->T	11	0	1	0	12	-	0.916667	CDS;gene	atpF_CDS-N2;atpF_gene-N1	atpF:CCC->TCC	atpF:P129S
Pinus armandii	12750	G	C->T	5	0	4	0	9	-	0.555556	CDS;gene	atpF_CDS-N1;atpF_gene-N1	atpF:CCA->CTA	atpF:P34L
Pinus armandii	12786	G	C->T	13	0	3	0	16	-	0.8125	CDS;gene	atpF_CDS-N1;atpF_gene-N1	atpF:TCA->TTA	atpF:S22L
Pinus armandii	13146	G	C->T	13	0	31	0	44	-	0.295455	-	-	-	-
Pinus armandii	14240	G	C->T	10	0	0	0	10	-	1	CDS;gene	atpI_CDS-N1;atpI_gene-N1	atpI:CCG->CTG	atpI:P208L
Pinus armandii	14891	G	C->T	3	0	3	0	6	-	0.5	-	-	-	-
Pinus armandii	15852	G	C->T	4	0	16	0	20	-	0.2	CDS;gene	rps2_CDS-N1;rps2_gene-N1	rps2:AAC->AAT	rps2:N22N
Pinus armandii	16487	G	C->T	5	0	1	0	6	-	0.833333	CDS;gene	rpoC2_CDS-N1;rpoC2_gene-N1	rpoC2:TCA->TTA	rpoC2:S1070L
Pinus armandii	16760	G	C->T	3	0	0	0	3	-	1	CDS;gene	rpoC2_CDS-N1;rpoC2_gene-N1	rpoC2:TCA->TTA	rpoC2:S979L
Pinus armandii	30083	C	C->T	0	0	0	13	13	+	1	CDS;gene	clpP_CDS-N1;clpP_gene-N1	clpP:TCA->TTA	clpP:S65L
Pinus armandii	31443	C	G->A	0	2	0	10	12	-	0.833333	-	-	-	-
Pinus armandii	32539	G	C->T	4	0	1	0	5	-	0.8	CDS;gene	rpl33_CDS-N1;rpl33_gene-N1	rpl33:TCA->TTA	rpl33:S48L
Pinus armandii	35984	C	C->T	0	0	0	3	3	-	1	CDS;gene	psbL_CDS-N1;psbL_gene-N1	psbL:CCA->CTA	psbL:P34L
Pinus armandii	37285	G	C->T	3	0	0	0	3	-	1	CDS;gene	petA_CDS-N1;petA_gene-N1	petA:CTT->TTT	petA:L319F
Pinus armandii	40003	G	C->T	9	0	2	0	11	+	0.818182	CDS;gene	ycf4_CDS-N1;ycf4_gene-N1	ycf4:TCA->TTA	ycf4:S173L
Pinus armandii	40132	G	C->T	10	0	3	0	13	+	0.769231	CDS;gene	ycf4_CDS-N1;ycf4_gene-N1	ycf4:ACG->ATG	ycf4:T130M
Pinus armandii	40168	G	C->T	4	0	7	0	11	-	0.363636	CDS;gene	ycf4_CDS-N1;ycf4_gene-N1	ycf4:TCA->TTA	ycf4:S118L
Pinus armandii	42034	G	C->T	4	0	0	0	4	-	1	CDS;gene	accD_CDS-N1;accD_gene-N1	accD:CCA->CTA	accD:P88L
Pinus armandii	46249	C	C->T	0	11	0	3	14	-	0.214286	CDS;gene	atpB_CDS-N1;atpB_gene-N1	atpB:CCT->CTT	atpB:P406L
Pinus armandii	52153	C	C->T	0	66	0	4	70	+	0.0571429	CDS;gene	psbB_CDS-N1;psbB_gene-N1	psbB:TCC->TCT	psbB:S439S
Pinus armandii	53413	C	C->T	0	75	0	5	80	+	0.0625	gene;intron	petB_gene-N1;petB_intron-N1	-	-
Pinus armandii	53520	C	C->T	0	51	0	6	57	+	0.105263	gene;intron	petB_gene-N1;petB_intron-N1	-	-
Pinus armandii	54030	C	C->T	0	4	0	67	71	-	0.943662	CDS;gene	petB_CDS-N2;petB_gene-N1	petB:CGG->TGG	petB:R9W
Pinus armandii	54395	C	C->T	0	7	0	74	81	+	0.91358	CDS;gene	petB_CDS-N2;petB_gene-N1	petB:ACC->ACT	petB:T130T
Pinus armandii	54610	C	C->T	0	4	0	63	67	+	0.940299	CDS;gene	petB_CDS-N2;petB_gene-N1	petB:CCA->CTA	petB:P202L
Pinus armandii	54853	C	G->A	0	1	0	27	28	-	0.964286	-	-	-	-
Pinus armandii	55807	C	C->T	0	2	0	12	14	+	0.857143	CDS;gene	petD_CDS-N2;petD_gene-N1	petD:CTT->TTT	petD:L81F
Pinus armandii	55889	C	C->T	0	1	0	11	12	-	0.916667	CDS;gene	petD_CDS-N2;petD_gene-N1	petD:TCA->TTA	petD:S108L
Pinus armandii	55964	C	C->T	0	1	0	10	11	-	0.909091	CDS;gene	petD_CDS-N2;petD_gene-N1	petD:TCC->TTC	petD:S133F
Pinus armandii	56047	C	C->T	0	1	0	4	5	+	0.8	CDS;gene	petD_CDS-N2;petD_gene-N1	petD:CAA->TAA	petD:Q161U
Pinus armandii	57213	G	C->T	4	0	0	0	4	-	1	CDS;gene	rpoA_CDS-N1;rpoA_gene-N1	rpoA:CTA->TTA	rpoA:L34L
Pinus armandii	58581	G	C->T	7	0	0	0	7	-	1	CDS;gene	rps8_CDS-N1;rps8_gene-N1	rps8:TCA->TTA	rps8:S77L
Pinus armandii	58623	G	C->T	8	0	3	0	11	-	0.727273	CDS;gene	rps8_CDS-N1;rps8_gene-N1	rps8:TCA->TTA	rps8:S63L
Pinus armandii	58629	G	C->T	7	0	3	0	10	-	0.7	CDS;gene	rps8_CDS-N1;rps8_gene-N1	rps8:TCG->TTG	rps8:S61L
Pinus armandii	59234	G	C->T	5	0	16	0	21	+	0.238095	CDS;gene	rpl14_CDS-N1;rpl14_gene-N1	rpl14:TGC->TGT	rpl14:C32C
Pinus armandii	61507	G	C->T	363	0	19	0	382	+	0.950262	CDS;gene	rpl22_CDS-N1;rpl22_gene-N1	rpl22:TCG->TTG	rpl22:S117L
Pinus armandii	62535	G	C->T	321	0	46	0	367	+	0.874659	CDS;gene	rpl2_CDS-N2;rpl2_gene-N1	rpl2:TCG->TTG	rpl2:S173L
Pinus armandii	64053	C	C->T	0	184	0	14	198	+	0.0707071	-	-	-	-
Pinus armandii	76079	C	C->T	0	0	0	8	8	-	1	CDS;gene	psaB_CDS-N1;psaB_gene-N1	psaB:ACT->ATT	psaB:T620I
Pinus armandii	76722	C	C->T	0	4	0	4	8	-	0.5	CDS;gene	rps14_CDS-N1;rps14_gene-N1	rps14:TCA->TTA	rps14:S49L
Pinus armandii	77557	G	C->T	37	0	60	0	97	-	0.381443	CDS;gene	psbZ_CDS-N1;psbZ_gene-N1	psbZ:TCA->TTA	psbZ:S50L
Pinus armandii	77686	G	C->T	122	0	2	0	124	+	0.983871	CDS;gene	psbZ_CDS-N1;psbZ_gene-N1	psbZ:TCG->TTG	psbZ:S7L
Pinus armandii	77854	G	C->T	14	0	111	0	125	-	0.112	-	-	-	-
Pinus armandii	77859	G	C->T	10	0	97	0	107	-	0.0934579	-	-	-	-
Pinus armandii	77874	C	G->A	0	48	0	3	51	-	0.0588235	-	-	-	-
Pinus armandii	79186	G	C->T	10	0	0	0	10	+	1	CDS;gene	psbC_CDS-N1;psbC_gene-N1	psbC:CCA->CTA	psbC:P175L
Pinus armandii	79784	G	C->T	7	0	0	0	7	-	1	CDS;gene	psbD_CDS-N1;psbD_gene-N1	psbD:TCT->TTT	psbD:S312F
Pinus armandii	79880	G	C->T	5	0	0	0	5	+	1	CDS;gene	psbD_CDS-N1;psbD_gene-N1	psbD:TCA->TTA	psbD:S280L
Pinus armandii	103979	G	C->T	3	0	1	0	4	+	0.75	CDS;gene	rpl32_CDS-N1;rpl32_gene-N1	rpl32:CGG->TGG	rpl32:R20W
Pinus armandii	106576	C	G->A	0	107	0	7	114	+	0.0614035	-	-	-	-
Pinus armandii	107093	C	C->T	0	1	0	45	46	-	0.978261	CDS;intron	rps12_intron-N1;rps12_gene-N2	-	-
Pinus armandii	107246	C	C->T	0	45	0	3	48	-	0.0625	CDS;intron	rps12_intron-N1;rps12_gene-N2	-	-
Pinus armandii	107627	G	G->A	8	0	121	0	129	+	0.0620155	CDS;gene	rps7_CDS-N1;rps7_gene-N1	rps7:GGA->GAA	rps7:G34E
Pinus armandii	107739	C	C->T	0	111	0	6	117	+	0.0512821	CDS;gene	rps7_CDS-N1;rps7_gene-N1	rps7:CCC->CCT	rps7:P71P

## Sheet: Ephedra przewalskii
Species	Coordinate	Gbase	EditType	Ephedra.RNA_baseCount A	C	G	T	total	Strand	frequency	TargetedGenomicFeature	TargetedFeatureID	CodonChange	AminoAcidChange
Ephedra przewalskii	21483	G	G->A	5	0	4	0	9	-	0.555556	CDS;gene	rpoC1_CDS-N1;rpoC1_gene-N1	rpoC1:AAG->AAA	rpoC1:K90K
Ephedra przewalskii	45930	C	G->A	0	54	0	3	57	-	0.0526316	-	-	-	-
Ephedra przewalskii	46014	G	C->T	314	0	4	0	318	-	0.987421	CDS;gene	rpl20_CDS-N1;rpl20_gene-N1	rpl20:TCA->TTA	rpl20:S90L

## Sheet: Welwitschia mirabilis
Species	Coordinate	Gbase	EditType	Welwitschia.RNA_baseCount A	C	G	T	total	Strand	frequency	TargetedGenomicFeature	TargetedFeatureID	CodonChange	AminoAcidChange
Welwitschia mirabilis	27378	G	G->A	965	0	556	3	1524	+	0.634451	gene;rRNA	rrn23_gene-N1;rrn23_rna-N1	-	-
Welwitschia mirabilis	43423	C	G->A	3	774	2	958	1737	-	0.553118	gene;rRNA	rrn23_gene-N2;rrn23_rna-N2	-	-
Welwitschia mirabilis	66008	G	G->A	14	0	196	0	210	+	0.0666667	CDS;gene	rps8_CDS-N1;rps8_gene-N1	rps8:AGG->AGA	rps8:R64R
Welwitschia mirabilis	67702	C	C->T	0	24	0	3	27	-	0.111111	CDS;gene	rpoA_CDS-N1;rpoA_gene-N1	rpoA:ATC->ATT	rpoA:I92I
Welwitschia mirabilis	108184	C	G->A	0	17	0	5	22	-	0.227273	CDS;gene	rpoB_CDS-N1;rpoB_gene-N1	rpoB:GAG->AAG	rpoB:E810K
Welwitschia mirabilis	108604	G	C->T	8	0	23	0	31	-	0.258065	CDS;gene	rpoB_CDS-N1;rpoB_gene-N1	rpoB:CCG->TCG	rpoB:P670S

## Sheet: Gnetum montanum
Species	Coordinate	Gbase	EditType	Gnetum.RNA_baseCount[A	C	G	T	total	Strand	frequency	TargetedGenomicFeature	TargetedFeatureID	CodonChange	AminoAcidChange
Gnetum montanum	21690	C	C->T	0	0	0	17	17	+	1	CDS;gene	rpoC1_CDS-N1;rpoC1_gene-N1	rpoC1:TCG->TTG	rpoC1:S56L
Gnetum montanum	27903	C	C->T	0	1	0	45	46	+	0.978261	CDS;gene	rpoC2_CDS-N1;rpoC2_gene-N1	rpoC2:TCA->TTA	rpoC2:S1178L
Gnetum montanum	31433	G	G->A	6	0	75	0	81	+	0.0740741	gene;intron	atpF_gene-N1;atpF_intron-N1	-	-
Gnetum montanum	53726	C	G->A	0	54	0	4	58	-	0.0689655	-	-	-	-
Gnetum montanum	83698	G	G->A	17740	0	13013	0	30753	+	0.576854	gene;rRNA	rrn23_gene-N1;rrn23_rna-N1	-	-
Gnetum montanum	90320	G	C->T	14	0	169	0	183	-	0.0765027	CDS;gene	ycf1_CDS-N1;ycf1_gene-N1	ycf1:GCT->GTT	ycf1:A1527V
Gnetum montanum	97822	C	G->A		18065		17955	36020	-	0.498473	gene;rRNA	rrn23_gene-N1;rrn23_rna-N1	-	-

[truncated: 9 more sheets: Podocarpus macrophyllus, Araucaria cunninghamii, Sciadopitys verticillata, Cephalotaxus sinensis, Taxus cuspidata, Cunninghamia lanceolata, Taiwania cryptomerioides, Metasequoia glyptostroboides, Platycladus orientalis]
